# Supplementary material for: A Rasch analysis of the Burnout Assessment Tool (BAT)
Source: PLOS journal article supplement (doi:10.1371/journal.pone.0242241), 2020-11-24
Supplement: S1 (10.1371/journal.pone.0242241.s001) [file journal.pone.0242241.s001]

## Work-related version of the BAT

### Instruction

The following statements are related to your work situation and how you experience this situation. Please state how often each statement applies to you.

### Scoring

| Never | Rarely | Sometimes | Often | Always |
|-------|--------|-----------|-------|--------|
| 1     | 2      | 3         | 4     | 5      |

### Questions

|                                                                                | Never                    | Rarely                   | Sometimes                | Often                    | Always                   |
|--------------------------------------------------------------------------------|--------------------------|--------------------------|--------------------------|--------------------------|--------------------------|
| <b>Exhaustion</b>                                                              |                          |                          |                          |                          |                          |
| At work, I feel mentally exhausted                                             | <input type="checkbox"/> | <input type="checkbox"/> | <input type="checkbox"/> | <input type="checkbox"/> | <input type="checkbox"/> |
| Everything I do at work requires a great deal of effort                        | <input type="checkbox"/> | <input type="checkbox"/> | <input type="checkbox"/> | <input type="checkbox"/> | <input type="checkbox"/> |
| After a day at work, I find it hard to recover my energy                       | <input type="checkbox"/> | <input type="checkbox"/> | <input type="checkbox"/> | <input type="checkbox"/> | <input type="checkbox"/> |
| At work, I feel physically exhausted                                           | <input type="checkbox"/> | <input type="checkbox"/> | <input type="checkbox"/> | <input type="checkbox"/> | <input type="checkbox"/> |
| When I get up in the morning, I lack the energy to start a new day at work     | <input type="checkbox"/> | <input type="checkbox"/> | <input type="checkbox"/> | <input type="checkbox"/> | <input type="checkbox"/> |
| I want to be active at work, but somehow I am unable to manage                 | <input type="checkbox"/> | <input type="checkbox"/> | <input type="checkbox"/> | <input type="checkbox"/> | <input type="checkbox"/> |
| When I exert myself at work, I quickly get tired                               | <input type="checkbox"/> | <input type="checkbox"/> | <input type="checkbox"/> | <input type="checkbox"/> | <input type="checkbox"/> |
| At the end of my working day, I feel mentally exhausted and drained            | <input type="checkbox"/> | <input type="checkbox"/> | <input type="checkbox"/> | <input type="checkbox"/> | <input type="checkbox"/> |
| <b>Mental distance</b>                                                         |                          |                          |                          |                          |                          |
| I struggle to find any enthusiasm for my work                                  | <input type="checkbox"/> | <input type="checkbox"/> | <input type="checkbox"/> | <input type="checkbox"/> | <input type="checkbox"/> |
| At work, I do not think much about what I am doing and I function on autopilot | <input type="checkbox"/> | <input type="checkbox"/> | <input type="checkbox"/> | <input type="checkbox"/> | <input type="checkbox"/> |
| I feel a strong aversion towards my job                                        | <input type="checkbox"/> | <input type="checkbox"/> | <input type="checkbox"/> | <input type="checkbox"/> | <input type="checkbox"/> |
| I feel indifferent about my job                                                | <input type="checkbox"/> | <input type="checkbox"/> | <input type="checkbox"/> | <input type="checkbox"/> | <input type="checkbox"/> |
| I'm cynical about what my work means to others                                 | <input type="checkbox"/> | <input type="checkbox"/> | <input type="checkbox"/> | <input type="checkbox"/> | <input type="checkbox"/> |
| <b>Cognitive impairment</b>                                                    |                          |                          |                          |                          |                          |
| At work, I have trouble staying focused                                        | <input type="checkbox"/> | <input type="checkbox"/> | <input type="checkbox"/> | <input type="checkbox"/> | <input type="checkbox"/> |
| At work I struggle to think clearly                                            | <input type="checkbox"/> | <input type="checkbox"/> | <input type="checkbox"/> | <input type="checkbox"/> | <input type="checkbox"/> |
| I'm forgetful and distracted at work                                           | <input type="checkbox"/> | <input type="checkbox"/> | <input type="checkbox"/> | <input type="checkbox"/> | <input type="checkbox"/> |
| When I'm working, I have trouble concentrating                                 | <input type="checkbox"/> | <input type="checkbox"/> | <input type="checkbox"/> | <input type="checkbox"/> | <input type="checkbox"/> |
| I make mistakes in my work because I have my mind on other things              | <input type="checkbox"/> | <input type="checkbox"/> | <input type="checkbox"/> | <input type="checkbox"/> | <input type="checkbox"/> |
| <b>Emotional impairment</b>                                                    |                          |                          |                          |                          |                          |
| At work, I feel unable to control my emotions                                  | <input type="checkbox"/> | <input type="checkbox"/> | <input type="checkbox"/> | <input type="checkbox"/> | <input type="checkbox"/> |
| I do not recognize myself in the way I react emotionally at work               | <input type="checkbox"/> | <input type="checkbox"/> | <input type="checkbox"/> | <input type="checkbox"/> | <input type="checkbox"/> |

Citation: Schaufeli, W.B., De Witte, H. & Desart, S. (2019). *Handleiding Burnout Assessment Tool (BAT)*. KU Leuven, België: Intern rapport. With the help of Russell Watts – Operations Director, Publishing and Ventures @ Penguin Random House UK

|                                                               |                          |                          |                          |                          |                          |
|---------------------------------------------------------------|--------------------------|--------------------------|--------------------------|--------------------------|--------------------------|
| During my work I become irritable when things don't go my way | <input type="checkbox"/> | <input type="checkbox"/> | <input type="checkbox"/> | <input type="checkbox"/> | <input type="checkbox"/> |
| I get upset or sad at work without knowing why                | <input type="checkbox"/> | <input type="checkbox"/> | <input type="checkbox"/> | <input type="checkbox"/> | <input type="checkbox"/> |
| At work I may overreact unintentionally                       | <input type="checkbox"/> | <input type="checkbox"/> | <input type="checkbox"/> | <input type="checkbox"/> | <input type="checkbox"/> |

---

|                                                                      | Never                    | Rarely                   | Sometimes                | Often                    | Always                   |
|----------------------------------------------------------------------|--------------------------|--------------------------|--------------------------|--------------------------|--------------------------|
| <i>Psychological complaints</i>                                      |                          |                          |                          |                          |                          |
| I have trouble falling or staying asleep                             | <input type="checkbox"/> | <input type="checkbox"/> | <input type="checkbox"/> | <input type="checkbox"/> | <input type="checkbox"/> |
| I tend to worry                                                      | <input type="checkbox"/> | <input type="checkbox"/> | <input type="checkbox"/> | <input type="checkbox"/> | <input type="checkbox"/> |
| I feel tense and stressed                                            | <input type="checkbox"/> | <input type="checkbox"/> | <input type="checkbox"/> | <input type="checkbox"/> | <input type="checkbox"/> |
| I feel anxious and/or suffer from panic attacks                      | <input type="checkbox"/> | <input type="checkbox"/> | <input type="checkbox"/> | <input type="checkbox"/> | <input type="checkbox"/> |
| Noise and crowds disturb me                                          | <input type="checkbox"/> | <input type="checkbox"/> | <input type="checkbox"/> | <input type="checkbox"/> | <input type="checkbox"/> |
| <i>Psychosomatic complaints</i>                                      |                          |                          |                          |                          |                          |
| I suffer from palpitations or chest pain                             | <input type="checkbox"/> | <input type="checkbox"/> | <input type="checkbox"/> | <input type="checkbox"/> | <input type="checkbox"/> |
| I suffer from stomach and/or intestinal complaints                   | <input type="checkbox"/> | <input type="checkbox"/> | <input type="checkbox"/> | <input type="checkbox"/> | <input type="checkbox"/> |
| I suffer from headaches                                              | <input type="checkbox"/> | <input type="checkbox"/> | <input type="checkbox"/> | <input type="checkbox"/> | <input type="checkbox"/> |
| I suffer from muscle pain, for example in the neck, shoulder or back | <input type="checkbox"/> | <input type="checkbox"/> | <input type="checkbox"/> | <input type="checkbox"/> | <input type="checkbox"/> |
| I often get sick                                                     | <input type="checkbox"/> | <input type="checkbox"/> | <input type="checkbox"/> | <input type="checkbox"/> | <input type="checkbox"/> |
