# Supplementary material for: A Rasch analysis of the Burnout Assessment Tool (BAT)
Source: PLoS One. 2020 Nov 24;15(11):e0242241. doi: 10.1371/journal.pone.0242241 (PMC7685472; doi:10.1371/journal.pone.0242241)
Supplement: S1 Data — (XLSX) [file pone.0242241.s004.xlsx]

## Sheet: Complete data n=2978
age	SEX	country	W_EX1	W_EX2	W_EX3	W_EX4	W_EX5	W_EX6	W_EX7	W_EX8	W_MD1	W_MD2	W_MD3	W_MD4	W_MD5	W_CC1	W_CC2	W_CC3	W_CC4	W_CC5	W_EC1	W_EC2	W_EC3	W_EC4	W_EC5
39	1	1	2	2	2	2	2	2	2	2	2	2	2	2	2	2	2	2	3	2	2	2	2	2	2
23	2	1	4	4	3	4	4	5	5	4	5	5	5	5	5	4	4	3	4	2	2	2	3	4	2
24	1	1	2	2	2	2	1	2	2	2	2	2	2	2	1	1	1	1	1	1	2	2	2	2	2
28	1	1	3	3	2	2	2	3	3	3	3	4	3	4	5	3	3	1	2	1	5	5	4	3	3
19	1	1	4	4	4	4	4	4	4	4	4	4	4	4	4	4	4	4	4	4	4	4	4	4	4
24	1	1	3	2	2	4	3	3	4	4	3	4	2	3	2	2	4	2	3	1	4	3	4	4	4
62	1	1	3	3	2	2	2	2	3	3	1	2	1	1	1	2	2	2	2	1	1	1	2	1	2
42	2	1	2	4	4	4	5	4	4	2	3	4	2	3	2	3	3	2	3	1	2	2	2	2	2
35	1	1	3	2	3	1	3	3	3	3	3	3	3	3	3	3	2	3	2	3	3	2	3	2	3
24	1	1	5	4	4	3	4	3	4	3	3	4	4	5	3	5	4	3	2	3	5	3	4	3	4
23	1	1	4	4	3	3	3	2	2	3	4	4	2	3	2	4	3	4	2	3	1	3	4	4	2
41	1	1	4	4	5	4	1	5	4	4	5	5	5	5	5	4	4	4	4	3	4	4	4	4	4
34	1	1	4	4	3	4	3	3	4	3	2	3	2	3	2	3	3	2	3	2	4	3	4	3	3
30	1	1	3	3	4	3	4	2	2	3	2	3	3	2	4	4	3	4	3	3	4	4	3	3	3
21	2	1	2	2	4	2	4	3	3	4	4	3	3	2	2	4	1	2	2	3	4	3	2	3	2
32	1	1	4	5	5	3	4	3	5	3	4	4	2	3	3	4	4	5	4	5	3	3	3	4	4
51	1	1	3	3	4	3	4	4	3	4	1	1	2	1	1	2	2	1	2	1	2	3	3	2	3
52	2	1	2	2	2	4	4	2	3	4	2	3	1	2	3	2	1	3	2	2	1	2	2	2	1
18	1	1	5	5	5	5	5	5	5	5	5	5	5	5	5	5	5	5	5	5	5	5	5	4	5
32	1	1	2	4	3	3	2	2	4	3	2	2	4	3	3	5	5	4	5	4	3	2	4	3	2
26	2	1	2	2	3	3	2	2	1	3	2	2	2	2	2	2	3	2	2	2	2	2	2	2	2
23	2	1	3	3	3	3	3	3	3	3	3	3	3	3	3	3	3	3	3	3	3	3	3	3	3
49	2	1	4	4	4	4	4	4	4	4	4	4	3	3	3	3	3	3	4	3	3	4	4	4	4
24	1	1	4	4	3	2	3	4	2	2	3	3	3	3	3	3	3	3	4	3	3	4	3	3	3
27	1	1	2	3	4	2	2	4	4	4	3	3	4	2	3	4	4	3	4	4	3	4	4	3	4
22	2	1	3	3	3	3	3	3	3	3	3	3	3	3	3	3	3	3	3	3	3	3	3	3	3
21	2	1	4	4	5	4	5	4	4	5	4	3	5	4	3	4	4	4	5	4	3	4	4	4	4
21	1	1	4	4	4	4	4	4	4	4	4	4	4	4	4	4	4	4	4	4	2	4	4	4	4
22	2	1	2	4	3	3	3	2	4	4	3	2	2	2	3	2	1	1	2	2	2	1	2	1	1
27	1	1	4	3	2	3	2	4	3	3	3	2	3	3	4	3	4	4	3	3	4	2	3	3	3
32	1	1	4	4	4	3	3	2	4	4	3	4	4	4	4	3	3	2	3	4	4	3	4	3	4
23	1	1	3	3	3	4	4	3	4	4	4	4	4	3	3	4	3	4	4	3	3	4	4	4	4
52	2	1	4	3	5	4	4	4	4	4	2	1	1	1	4	3	2	2	2	2	2	2	3	2	3
47	2	1	3	3	3	3	3	3	3	3	2	3	3	2	3	3	2	2	2	2	1	1	2	1	3
62	1	1	1	2	4	3	1	1	2	3	1	1	1	1	1	1	1	1	1	1	1	2	2	3	3
32	1	1	5	3	5	4	4	4	5	4	3	4	5	4	5	4	4	5	5	5	5	5	5	3	4
63	1	1	3	3	3	4	2	3	3	3	2	2	2	3	3	2	1	2	2	2	1	2	2	2	1
63	1	1	4	3	4	4	4	4	4	4	2	3	1	1	3	2	2	2	3	3	3	2	2	1	3
35	1	1	5	4	5	4	5	5	5	5	4	4	4	3	4	5	5	5	4	5	4	4	5	4	4
32	2	1	4	3	5	1	4	2	4	2	1	5	2	4	3	1	4	2	3	2	3	1	3	5	5
45	2	1	5	5	5	5	5	5	5	5	5	5	5	5	5	3	4	4	4	4	4	4	4	2	4
47	1	1	5	5	5	5	5	5	5	5	3	2	5	3	5	2	1	2	2	1	3	3	5	3	3
36	1	1	3	3	3	3	5	3	3	4	3	3	3	3	3	4	3	4	4	4	3	4	3	3	3
39	2	1	5	5	1	5	5	3	5	5	4	5	4	3	4	4	3	1	3	3	3	1	4	3	1
37	1	1	4	4	4	4	3	4	4	4	2	4	2	2	2	4	3	3	4	4	3	2	3	2	2
57	2	1	1	2	1	3	2	3	3	2	1	1	1	1	1	1	1	1	1	1	1	1	2	1	1
56	1	1	1	1	1	1	1	2	1	1	1	1	1	1	1	1	1	1	1	1	1	1	1	1	1
38	2	1	1	1	1	1	2	1	1	1	1	2	1	1	1	1	1	1	1	1	1	1	1	1	1
24	2	1	3	3	3	3	3	3	3	3	3	3	3	3	3	3	3	3	3	3	3	3	3	3	3
33	2	1	1	1	1	1	1	1	1	1	1	1	1	1	1	1	1	1	1	1	1	1	1	1	1
31	2	1	4	4	4	4	4	4	4	4	3	4	3	3	3	3	4	3	3	3	3	3	3	3	3
50	1	1	1	1	2	1	2	1	2	2	2	3	1	2	1	2	2	2	2	2	1	1	2	1	1
56	1	1	1	1	1	3	2	3	3	1	3	1	1	1	1	1	1	1	1	1	1	1	1	1	1
61	2	1	2	2	2	3	2	2	2	2	1	1	1	1	2	1	1	1	1	1	1	1	2	1	2
46	1	1	3	5	1	5	5	5	1	5	5	5	5	5	5	5	5	5	5	2	1	1	1	1	1
65	1	1	1	2	3	3	2	3	3	3	1	1	1	1	1	1	1	2	1	2	2	2	2	1	1
31	2	1	3	3	3	3	3	3	3	3	3	3	3	3	3	3	3	3	3	3	3	3	3	3	3
24	2	1	3	3	3	3	3	3	3	3	3	3	3	3	3	3	3	3	3	3	3	3	3	3	3
55	2	1	2	2	2	2	3	3	3	2	2	2	1	2	2	3	3	3	3	3	3	3	3	2	3
21	1	1	4	3	2	4	3	3	4	3	4	3	4	3	4	4	3	4	4	3	5	3	4	3	2
55	1	1	5	1	5	5	5	5	5	5	3	1	3	1	1	5	5	5	5	4	4	3	4	3	3
65	2	1	3	2	2	1	2	2	3	3	1	1	1	1	1	2	2	1	2	2	2	1	1	1	2
27	1	1	2	2	2	3	2	2	2	3	2	3	2	2	2	2	2	3	2	2	2	2	2	2	2
29	2	1	2	2	2	3	2	2	4	2	3	1	1	2	2	2	2	1	2	2	1	1	2	1	1
50	2	1	2	2	2	2	2	2	2	2	2	3	2	2	1	2	2	2	2	1	1	2	2	1	2
53	2	1	3	3	4	3	3	3	3	4	2	3	2	2	1	3	3	1	3	2	3	3	3	1	3
30	1	1	1	3	1	1	2	2	1	1	2	1	2	2	2	1	3	2	1	2	2	2	2	2	2
57	2	1	2	2	2	2	2	2	2	2	1	1	1	1	1	1	1	2	1	1	1	1	1	1	1
55	1	1	2	2	3	3	3	3	3	3	3	2	1	1	1	1	1	1	1	1	2	2	1	2	2
21	1	1	3	3	3	3	3	3	3	3	3	3	3	3	3	3	3	3	3	3	3	3	3	3	3
24	2	1	4	4	4	4	4	4	4	4	4	4	4	4	4	4	3	4	4	2	3	3	3	3	3
32	2	1	3	3	4	3	3	3	3	3	2	2	2	1	3	2	2	2	2	2	1	1	2	1	1
20	2	1	4	4	4	4	4	4	4	4	4	4	4	4	4	4	4	4	4	4	4	4	4	4	4
27	1	1	2	2	2	3	2	2	4	2	3	4	2	3	4	2	2	2	2	2	3	3	4	2	3
45	2	1	5	4	4	5	5	5	5	5	4	3	3	3	3	4	3	3	4	2	3	3	3	2	3
30	1	1	2	4	4	1	5	4	3	2	2	3	3	5	4	1	3	4	5	5	4	2	5	3	4
24	2	1	2	2	1	1	2	2	2	2	1	2	1	1	1	2	2	2	2	1	1	1	1	1	1
45	1	1	3	3	3	3	4	3	3	3	3	4	3	3	3	3	3	3	3	3	2	2	3	2	2
21	1	1	5	2	4	3	3	2	4	1	2	1	5	1	1	4	3	2	3	2	2	4	4	3	4
37	2	1	3	3	3	3	3	1	3	3	1	1	3	1	1	1	1	1	1	1	1	1	1	1	1
62	1	1	1	3	2	5	3	5	5	5	1	2	1	1	1	2	1	1	2	2	1	1	2	1	1
57	2	1	2	2	2	2	3	3	3	3	2	2	2	2	2	3	2	2	2	3	2	2	2	2	2
48	2	1	1	1	1	1	1	1	2	1	1	4	1	2	1	2	2	2	2	2	1	1	2	1	1
24	1	1	2	2	3	1	4	4	3	5	1	4	2	2	2	2	3	1	5	4	4	1	2	2	3
62	1	1	1	1	1	1	1	1	1	2	1	1	1	1	1	1	1	1	1	1	1	1	1	1	1
47	1	1	1	1	1	1	1	1	1	1	1	1	1	1	1	1	1	1	2	1	1	1	1	1	1
62	1	1	3	2	2	2	1	2	3	4	2	4	1	2	1	2	2	2	3	3	1	2	1	1	1
53	1	1	4	3	4	3	4	3	4	3	2	3	3	3	3	3	4	4	3	3	3	2	2	3	3
56	2	1	2	3	2	3	3	3	3	3	4	4	3	4	2	1	1	1	1	1	1	1	3	1	1
49	2	1	2	3	2	2	2	2	3	3	1	2	1	1	1	2	2	2	2	2	1	1	3	1	2
58	2	1	1	2	1	1	1	1	1	2	1	1	1	2	1	1	1	1	1	2	1	1	1	1	1
19	2	1	5	2	4	5	3	1	2	5	3	5	3	3	3	3	3	3	3	2	1	1	2	1	1
37	1	1	3	3	2	3	4	2	3	3	5	3	3	4	3	3	3	2	4	3	3	2	2	3	3
22	1	1	3	3	3	3	3	3	3	3	3	3	3	3	3	3	3	3	3	3	3	3	3	3	3
59	1	1	2	2	1	2	2	2	2	2	2	2	2	2	2	2	2	2	2	2	2	2	2	2	2
31	1	1	1	3	2	1	2	1	3	3	1	5	1	5	5	1	1	1	1	1	1	1	1	1	1
26	1	1	1	1	2	2	1	2	1	3	1	4	2	2	2	1	1	2	1	1	1	1	2	1	1
33	2	1	1	1	1	1	2	2	1	3	4	4	3	4	3	3	2	2	1	2	1	1	1	1	1
45	2	1	1	1	1	1	1	1	1	1	1	1	1	1	1	1	1	1	1	1	1	1	1	1	1
65	1	1	1	1	1	1	1	1	1	1	1	1	1	1	1	1	1	1	1	1	1	1	1	1	1
44	2	1	1	1	1	1	1	1	1	1	1	1	1	1	1	1	1	1	1	1	1	1	1	1	1
49	1	1	1	1	1	1	3	3	1	1	2	4	3	4	3	1	1	1	1	1	1	1	2	1	2
63	2	1	1	1	1	1	1	1	1	1	1	1	1	1	1	1	1	1	1	1	1	1	1	1	1
59	1	1	2	2	2	1	2	2	2	3	2	2	2	3	3	3	1	2	3	2	2	2	2	1	1
60	1	1	1	1	1	1	1	2	2	1	1	1	1	1	1	1	1	1	1	2	1	1	1	1	1
39	2	1	1	1	1	2	1	1	2	2	1	4	1	1	1	1	1	1	1	1	1	1	1	1	1
64	2	1	1	1	1	1	1	2	1	1	1	1	1	1	1	1	1	1	1	1	1	1	1	1	1
44	2	1	4	3	4	4	4	2	4	4	3	2	3	4	2	4	4	3	3	1	3	3	4	4	3
61	1	1	1	2	1	2	2	2	2	2	1	2	1	1	1	2	2	2	2	2	2	1	4	1	2
49	1	1	1	1	1	1	1	1	1	3	1	1	1	1	1	1	1	1	1	1	1	1	1	1	1
42	1	1	2	2	2	2	2	2	2	2	2	3	2	2	2	2	2	2	2	2	2	2	2	2	2
49	2	1	2	1	1	2	1	1	1	1	2	2	1	2	3	1	1	1	2	1	1	1	2	1	2
56	2	1	1	1	1	1	1	1	2	1	1	1	1	1	1	1	1	1	1	1	1	1	1	1	2
42	2	1	1	1	1	1	1	1	1	1	1	1	1	1	1	1	1	1	1	1	1	1	1	1	1
35	1	1	1	1	1	1	1	1	1	1	1	1	1	1	1	1	1	1	1	1	1	1	1	1	1
18	1	1	3	1	4	3	2	3	3	2	3	2	3	3	2	2	2	3	2	1	2	3	2	2	3
61	2	1	1	1	1	1	1	1	1	1	1	1	1	1	1	1	1	1	1	1	1	1	1	1	1
62	1	1	1	1	1	1	2	1	2	2	1	2	1	1	1	1	1	1	1	1	1	1	1	1	1
63	1	1	1	3	1	2	2	1	2	2	1	1	1	1	1	1	1	1	1	1	1	1	1	1	1
31	2	1	1	1	3	2	3	1	1	1	4	4	4	4	4	1	1	1	1	1	1	1	1	1	1
45	2	1	1	1	3	2	1	1	1	1	3	3	1	1	1	1	1	1	1	1	1	1	1	1	1
50	2	1	1	5	3	3	3	3	3	3	1	2	1	1	1	2	3	2	3	2	1	1	1	1	1
52	2	1	2	1	1	2	1	1	2	1	1	2	1	1	1	2	1	2	1	1	1	1	2	1	2
53	1	1	2	1	1	2	1	1	1	2	1	3	1	1	3	1	1	2	1	2	1	1	2	1	1
41	1	1	3	3	3	3	3	3	3	3	3	3	3	3	3	3	3	3	3	3	3	3	3	3	3
48	2	1	1	1	1	1	1	1	1	1	1	1	1	1	1	1	1	1	1	1	1	1	1	1	1
35	2	1	1	1	1	1	1	1	1	1	1	1	1	1	2	2	2	2	2	2	1	1	3	1	2
47	1	1	1	1	1	2	2	1	2	2	2	3	1	1	2	1	2	1	1	1	1	1	2	1	1
53	1	1	2	2	2	3	2	2	2	3	3	2	1	2	1	1	1	1	1	1	1	1	1	1	1
42	1	1	2	1	1	1	1	1	2	1	1	2	1	1	1	1	1	1	1	1	1	1	1	1	1
26	1	1	1	2	2	1	3	2	1	1	1	1	1	3	2	2	1	2	1	1	2	1	1	1	1
33	1	1	1	1	1	1	1	1	4	1	2	4	1	2	2	1	1	1	1	1	1	1	1	1	1
28	2	1	3	3	3	3	3	3	3	3	2	2	2	2	2	2	2	2	2	2	2	2	3	2	2
43	2	1	1	1	1	1	1	1	1	1	1	1	1	1	1	1	1	1	1	1	1	1	1	1	1
50	2	1	1	2	3	3	3	2	3	3	1	3	1	1	1	1	1	1	1	1	1	1	1	1	1
55	2	1	1	1	1	2	3	3	1	2	2	4	2	3	3	2	2	2	2	2	2	2	4	2	2
39	1	1	3	4	4	3	4	4	3	4	4	3	4	4	3	3	4	2	4	3	3	5	4	4	5
51	1	1	3	2	2	3	3	2	3	3	2	2	2	2	2	2	2	3	3	2	2	2	3	2	2
41	2	1	1	1	1	1	1	1	1	1	1	1	1	1	1	1	1	1	1	1	1	1	1	1	1
38	2	1	2	4	3	3	4	3	2	3	3	4	2	3	3	2	2	3	4	3	3	3	2	3	4
22	2	1	1	1	1	2	1	1	2	1	1	2	1	1	1	1	1	2	1	1	1	1	1	1	1
49	1	1	2	2	2	2	2	2	2	2	2	2	2	2	2	2	2	2	2	2	2	2	2	2	2
36	1	1	3	3	4	3	4	2	4	3	2	4	3	3	4	3	2	2	1	3	2	3	3	3	3
53	1	1	2	2	2	2	2	2	2	2	2	2	2	2	2	2	3	3	3	2	3	3	3	3	3
42	2	1	1	2	1	2	1	1	1	1	1	1	1	1	1	1	1	1	1	1	1	1	1	1	1
24	1	1	2	2	2	2	2	2	2	2	2	3	2	2	2	2	2	2	3	2	2	2	2	2	2
18	1	1	2	4	4	3	4	4	4	3	3	3	3	3	4	3	4	4	3	2	4	4	4	2	3
24	2	1	1	1	1	2	1	1	1	1	1	1	1	2	1	1	1	2	1	1	1	1	1	1	1
56	1	1	3	1	3	2	1	3	2	3	2	4	1	1	2	2	2	3	2	3	2	1	2	1	2
57	2	1	2	2	2	2	2	2	3	2	2	2	2	2	2	4	2	2	2	2	2	2	2	2	2
60	1	1	1	1	1	1	1	1	1	1	1	1	1	1	1	1	1	1	1	1	1	1	1	1	1
54	2	1	3	3	3	3	3	3	3	3	3	3	3	3	3	3	3	3	3	3	3	3	3	3	3
22	2	1	2	3	2	1	2	3	2	2	2	2	2	1	1	3	3	3	3	2	2	1	2	2	1
55	1	1	3	1	1	1	1	1	1	1	1	3	1	1	2	1	1	1	1	1	1	1	1	1	1
57	1	1	1	2	2	2	2	2	1	2	1	1	1	1	1	2	2	1	1	1	1	1	1	1	1
23	2	1	1	1	1	1	1	1	1	1	1	1	1	1	1	1	1	1	1	1	1	1	1	1	1
36	1	1	3	3	4	3	4	4	3	4	4	4	5	4	3	3	3	4	4	4	5	5	5	4	4
22	2	1	3	3	3	3	3	3	3	3	3	3	3	3	3	3	3	3	3	3	3	3	3	3	3
19	1	1	2	2	2	2	3	3	3	3	2	4	2	3	2	2	2	3	2	2	2	2	4	2	2
21	1	1	4	4	4	4	4	3	4	4	3	2	5	3	5	5	4	2	5	4	3	3	3	2	2
59	2	1	1	1	1	1	1	1	1	1	1	1	1	1	1	1	1	1	1	1	1	1	1	1	1
53	1	1	1	3	1	3	1	3	5	1	1	3	1	1	1	1	1	1	1	1	1	1	1	1	1
27	1	1	2	2	2	2	2	1	2	2	3	3	3	3	3	3	3	4	1	2	3	2	1	4	2
57	2	1	3	3	3	3	3	3	3	3	3	3	3	3	3	3	3	3	3	3	3	3	3	3	3
50	1	1	1	1	1	1	1	1	1	1	1	1	1	1	1	2	1	3	1	2	1	1	1	1	1
26	1	1	2	3	2	2	3	2	2	3	4	4	1	1	3	1	2	2	1	1	1	2	1	1	1
31	2	1	3	3	2	3	4	1	2	5	3	4	2	2	4	2	3	1	4	1	3	1	2	2	2
21	1	1	1	1	1	1	1	1	1	1	1	1	1	1	1	1	1	1	1	1	1	1	1	1	1
18	1	1	1	1	1	1	1	1	1	1	1	1	1	1	1	1	1	1	1	1	1	1	1	1	1
20	2	1	2	2	3	2	3	4	2	3	2	4	1	2	2	3	2	2	2	1	1	1	1	1	1
19	1	1	4	4	4	4	4	4	4	4	3	3	3	3	3	4	4	4	4	4	4	4	4	4	4
18	2	1	2	2	1	1	1	2	2	1	1	1	1	1	1	1	1	2	1	1	1	1	1	1	1
23	2	1	3	2	3	3	3	3	3	4	2	4	3	3	3	2	3	3	2	2	3	3	2	2	3
23	1	1	1	2	2	2	2	3	4	3	2	4	1	3	2	1	1	1	1	2	1	1	1	1	1
24	2	1	3	2	1	2	3	2	1	2	4	2	2	3	1	2	2	1	2	1	1	1	1	1	1
22	2	1	2	1	3	2	1	2	4	3	1	1	1	1	1	1	1	1	1	1	1	1	1	1	1
23	2	1	3	2	2	2	1	1	4	2	2	2	2	2	2	2	2	1	2	1	3	2	2	1	3
23	1	1	2	2	2	3	2	3	3	3	3	3	3	2	2	3	3	3	4	4	2	3	2	3	3
20	1	1	1	1	1	1	1	1	1	1	1	1	1	1	1	1	1	1	1	1	1	1	1	1	1
34	1	1	3	2	2	2	2	3	2	3	2	2	2	2	2	2	2	2	2	2	2	2	2	2	2
55	1	1	3	2	2	3	3	2	3	4	1	1	1	1	1	1	2	1	1	2	1	1	1	1	1
64	2	1	2	2	2	2	2	2	2	2	1	1	1	1	1	1	1	1	1	1	1	1	1	1	1
36	2	1	1	1	1	1	1	1	1	1	1	1	1	1	1	1	1	1	1	1	1	1	1	1	1
37	2	1	3	3	2	3	3	3	2	3	2	3	2	1	1	2	2	1	2	1	2	2	3	2	2
63	2	1	2	2	2	1	2	2	2	2	2	1	2	1	2	2	2	2	2	2	2	1	2	2	2
61	1	1	4	4	3	4	3	3	4	4	3	4	3	3	3	3	3	3	4	3	3	3	3	3	3
43	1	1	1	5	3	4	4	3	2	2	2	3	4	3	2	5	3	3	3	2	2	2	4	1	2
47	1	1	3	2	2	2	2	3	3	2	3	3	2	3	3	3	2	3	3	3	2	3	3	3	2
45	2	1	2	2	2	2	2	2	2	2	2	2	2	2	2	2	2	2	2	2	2	2	2	2	2
51	1	1	3	2	3	3	2	2	2	2	2	4	1	3	1	2	2	3	2	2	3	2	3	2	2
34	2	1	2	1	1	2	2	1	4	2	3	1	1	3	3	1	1	2	1	1	2	1	3	2	2
48	2	1	3	2	2	3	2	2	2	2	3	4	3	3	2	2	2	2	2	2	2	2	2	2	2
32	1	1	2	2	3	2	2	2	3	2	1	2	2	2	1	1	2	2	1	2	3	1	3	1	3
47	1	1	1	1	1	1	1	1	1	1	1	1	1	1	1	1	1	1	1	2	1	1	1	1	1
35	1	1	2	2	2	1	2	1	1	1	3	4	3	2	4	1	1	2	2	2	1	1	4	1	1
29	1	1	3	4	3	4	3	3	3	3	4	3	3	4	4	3	3	4	4	3	3	3	3	2	3
57	1	1	2	3	2	3	2	2	4	3	1	3	2	1	3	2	2	3	2	2	1	2	3	1	2
47	1	1	3	3	3	4	4	3	3	3	4	3	3	3	4	3	2	3	2	3	4	3	3	3	3
53	1	1	1	1	1	1	1	2	1	1	1	1	1	1	1	1	1	1	1	1	1	1	1	1	1
18	1	1	4	4	4	4	4	4	4	4	3	3	3	4	4	2	2	4	3	2	3	4	5	4	5
23	1	1	4	4	3	3	3	4	4	3	3	3	3	3	3	2	3	3	3	3	3	3	3	3	2
63	1	1	1	1	1	1	1	1	1	1	1	1	1	1	1	1	1	1	1	1	1	1	1	1	1
31	1	1	1	1	1	1	1	1	1	1	1	1	1	1	1	1	1	1	1	1	1	1	1	1	1
37	1	1	2	2	2	3	1	1	1	2	1	1	1	1	1	1	1	3	1	2	1	1	1	1	1
40	1	1	3	3	2	1	3	3	4	3	3	3	2	3	5	4	4	3	4	2	2	1	4	2	3
29	2	1	3	1	2	2	3	1	2	3	1	1	1	1	1	1	1	1	1	2	1	1	1	1	1
57	2	1	1	1	1	2	2	1	1	1	2	1	1	1	1	2	1	1	1	2	1	1	3	2	2
61	1	1	3	3	4	3	2	2	3	4	1	2	1	1	3	2	1	2	2	2	1	3	3	1	3
46	2	1	1	1	3	4	3	1	4	3	1	3	3	3	3	1	3	1	3	2	1	1	3	1	2
52	1	1	1	1	1	1	1	1	1	1	1	2	1	1	1	1	1	1	2	1	1	1	1	1	1
25	2	1	3	2	2	2	2	2	2	2	2	2	2	2	2	2	2	3	3	2	2	2	3	2	2
42	2	1	1	3	2	2	2	2	2	2	2	2	1	2	2	2	2	2	2	2	2	2	2	2	2
64	1	1	1	1	1	1	1	1	1	1	1	1	1	1	1	1	1	1	1	1	1	1	1	1	1
47	2	1	2	2	3	3	3	4	2	4	1	1	1	1	1	2	2	2	2	2	2	1	2	1	3
50	1	1	1	1	4	1	2	1	1	2	1	2	1	1	1	1	1	1	1	1	1	1	2	1	1
31	2	1	4	4	4	4	4	4	4	4	4	4	3	4	3	4	4	4	4	4	4	3	3	4	3
35	1	1	2	2	3	3	3	2	2	3	1	2	1	2	1	2	1	2	2	1	1	1	3	1	2
39	1	1	4	3	4	3	4	2	3	4	4	4	4	4	4	3	4	3	3	3	2	2	3	2	2
47	2	1	2	2	4	2	5	2	2	3	1	1	2	1	4	1	2	2	1	1	3	2	4	2	3
52	2	1	2	2	2	2	2	2	2	3	1	1	1	1	1	1	1	1	1	1	1	1	2	1	1
47	2	1	1	1	1	1	2	1	1	2	1	2	1	1	1	2	1	1	1	2	1	1	1	1	1
25	1	1	2	2	2	2	2	2	2	2	2	2	2	2	2	2	2	2	2	2	2	2	2	2	2
53	1	1	1	3	2	2	1	1	1	2	1	2	3	2	2	1	1	1	1	1	1	1	1	1	1
47	2	1	1	2	1	1	3	2	1	3	1	1	1	1	2	1	1	2	1	1	1	1	1	1	1
35	1	1	2	2	2	2	2	2	2	2	1	3	1	1	1	1	1	1	2	1	1	1	1	1	1
57	2	1	1	1	1	1	1	1	1	1	3	3	3	1	3	1	1	1	1	1	1	1	1	1	1
28	1	1	2	3	1	3	2	2	2	2	2	2	2	2	2	2	2	2	2	2	2	2	2	2	2
47	2	1	3	3	3	3	3	3	3	3	3	3	3	3	4	2	2	2	2	2	2	2	3	2	3
25	1	1	4	4	3	4	4	4	2	4	3	4	3	3	3	2	4	3	3	3	3	4	3	3	4
44	2	1	3	3	3	3	3	3	3	3	3	3	3	3	3	3	3	3	3	3	3	3	3	3	3
56	1	1	2	2	3	2	2	2	2	2	2	2	2	3	2	2	2	2	2	2	2	2	2	2	2
52	2	1	2	2	3	3	3	2	2	3	1	2	1	1	1	2	2	1	3	2	1	1	2	1	1
27	1	1	1	1	2	2	2	2	1	3	1	4	2	2	2	1	1	1	1	1	1	1	1	1	1
60	2	1	2	2	2	2	2	2	2	2	2	2	2	2	2	1	1	1	1	1	1	1	1	1	1
62	2	1	1	1	1	1	1	1	1	1	1	1	1	1	1	1	1	1	1	1	1	1	1	1	1
34	1	1	1	4	3	2	4	3	4	5	3	4	2	1	5	3	4	2	1	5	2	3	5	4	2
35	2	1	2	1	2	1	2	2	2	2	2	2	2	2	2	2	2	2	2	2	2	2	2	2	2
46	2	1	1	2	1	2	1	1	2	1	1	5	3	3	1	5	1	1	1	1	1	3	2	2	2
40	1	1	1	1	1	1	1	1	1	1	1	1	1	1	1	1	1	1	1	1	1	1	1	1	1
23	1	1	2	3	3	2	2	1	2	2	2	2	3	2	2	2	2	1	1	1	2	2	1	1	2
40	2	1	2	4	3	3	3	3	3	3	4	3	3	3	3	3	2	3	3	3	3	3	3	3	3
47	1	1	3	3	3	3	3	3	3	3	3	3	3	3	3	3	3	3	3	3	3	3	3	3	3
56	2	1	1	1	1	1	1	1	1	1	1	1	1	1	1	1	1	1	1	1	1	1	1	1	1
32	1	1	4	4	4	4	4	4	4	4	4	4	4	4	4	1	1	1	1	1	1	1	1	1	1
22	1	1	2	2	2	3	2	2	2	3	2	3	1	1	1	2	2	2	2	2	1	2	2	2	2
28	1	1	1	1	1	1	1	1	1	1	1	1	1	1	1	1	1	1	1	1	1	1	1	1	1
41	2	1	3	2	4	2	3	2	2	4	2	2	1	2	2	2	2	3	2	2	3	3	3	2	3
58	1	1	2	2	4	2	2	3	2	2	2	1	1	1	2	1	2	2	2	2	1	4	3	1	2
61	2	1	1	1	1	1	1	1	1	3	1	1	1	1	1	1	1	1	1	1	1	1	1	1	1
58	2	1	2	3	3	3	3	2	3	2	1	1	1	1	1	1	1	1	1	2	1	2	1	1	1
49	1	1	3	3	4	3	4	4	3	3	3	3	3	4	3	3	3	4	2	3	2	3	2	3	4
40	2	1	1	1	3	3	3	1	3	3	1	2	1	1	1	1	1	1	1	1	1	1	2	1	1
52	1	1	1	2	3	3	3	2	2	3	2	4	2	2	4	1	1	1	1	2	1	1	4	1	2
40	2	1	1	1	3	1	2	1	1	1	1	1	1	1	1	2	1	1	2	2	1	1	1	1	1
49	2	1	2	2	3	2	2	2	2	3	1	1	1	1	1	1	1	1	1	2	2	2	2	2	2
50	1	1	3	3	3	3	3	3	3	3	3	3	3	3	3	3	3	3	3	3	3	3	3	3	3
57	1	1	3	3	1	2	2	4	3	3	4	3	3	3	3	2	2	3	2	2	1	1	2	1	1
58	1	1	1	1	1	1	1	1	1	1	1	1	1	1	1	1	1	1	1	1	1	1	1	1	1
44	1	1	2	2	1	1	2	2	2	2	1	1	1	2	1	1	2	1	2	1	1	1	2	1	1
55	2	1	2	2	2	2	2	2	2	2	2	1	2	2	2	2	2	2	2	2	2	2	2	2	2
39	2	1	3	3	3	3	3	3	3	3	2	2	2	2	2	2	2	2	2	2	4	4	4	4	4
60	1	1	3	2	3	3	2	2	3	3	3	2	2	3	3	3	3	2	3	2	2	3	3	2	2
58	1	1	2	1	1	1	1	1	2	1	1	1	1	1	1	1	2	2	1	2	1	1	2	1	1
51	1	1	2	2	2	2	4	3	3	2	3	4	2	2	2	2	3	2	2	2	2	2	3	2	3
39	2	1	3	3	3	3	3	3	3	3	3	3	3	3	3	3	3	3	3	3	3	3	3	3	3
55	2	1	1	2	1	3	1	2	3	3	1	1	1	1	1	1	1	2	1	2	1	1	2	1	1
51	1	1	3	3	3	3	3	3	3	3	3	3	3	3	3	2	2	2	2	2	3	3	3	3	3
29	1	1	2	2	3	2	3	3	2	2	3	2	2	3	3	2	3	3	2	2	2	3	3	3	2
50	2	1	2	2	2	2	2	2	2	2	2	2	2	2	2	2	2	2	2	2	2	2	2	2	2
55	2	1	3	3	3	3	2	3	3	3	2	2	2	2	2	2	2	2	2	2	2	2	2	2	2
45	1	1	2	2	2	2	2	2	2	2	3	4	2	3	2	2	2	2	2	2	2	2	2	2	2
64	2	1	2	1	2	1	2	1	1	2	1	1	1	1	2	2	2	2	2	1	1	1	1	1	1
36	2	1	3	2	3	3	3	4	2	2	3	3	2	3	4	3	3	2	3	2	1	2	4	1	1
38	2	1	3	3	2	1	2	3	2	1	4	2	3	2	3	3	1	3	2	2	4	3	3	3	2
27	2	1	2	2	2	2	2	2	3	2	2	2	2	2	2	2	2	2	2	3	2	2	2	2	2
36	2	1	3	2	3	1	3	3	2	3	3	2	2	1	3	3	3	3	3	2	1	1	3	1	1
31	2	1	2	2	3	3	4	3	3	4	4	3	4	3	2	1	2	2	2	2	2	2	2	2	2
57	1	1	1	1	1	1	1	1	1	2	1	1	1	1	1	1	1	1	1	1	1	1	1	1	1
31	1	1	2	4	1	3	1	4	4	1	4	3	3	3	3	1	2	1	2	2	3	2	3	2	3
42	1	1	1	1	1	1	1	1	2	3	1	1	1	1	1	1	1	1	1	1	1	1	1	1	1
30	2	1	3	3	3	3	4	3	3	4	3	2	3	2	2	2	3	2	3	2	2	2	3	2	2
65	1	1	1	3	3	2	1	2	2	3	1	2	1	3	1	1	1	1	2	2	1	1	1	1	1
57	1	1	1	1	1	1	1	1	1	1	1	1	1	1	1	1	1	1	1	1	1	1	1	1	1
49	1	1	2	3	2	4	2	3	3	2	2	1	1	1	1	3	3	3	3	2	1	2	3	1	2
39	2	1	2	3	3	3	2	3	2	3	2	3	2	2	2	3	2	3	3	3	2	2	2	2	2
41	2	1	1	1	1	1	1	1	1	1	1	1	1	2	1	2	1	3	1	3	1	1	1	1	1
54	2	1	2	1	1	2	2	2	2	1	1	1	1	1	1	1	1	1	1	1	1	1	1	1	1
34	1	1	2	2	2	1	3	2	2	2	2	2	2	2	3	3	2	2	3	2	1	1	2	2	1
42	1	1	3	2	2	2	2	1	1	1	1	1	1	1	1	1	1	1	1	2	1	2	1	1	3
63	2	1	2	1	1	1	1	1	1	1	1	2	1	2	1	1	2	2	2	2	2	2	2	1	2
47	1	1	3	4	1	3	1	1	1	1	1	1	1	1	1	1	1	1	3	3	1	1	1	1	1
36	1	1	2	2	2	2	4	2	3	3	2	2	2	2	2	2	2	2	2	3	2	2	3	1	2
56	1	1	2	2	1	1	1	1	2	2	2	2	1	1	3	2	2	1	2	1	1	1	1	2	2
47	1	1	5	5	5	5	5	4	5	5	5	5	5	5	4	5	4	4	4	5	2	3	4	3	2
54	1	1	2	1	1	1	2	1	2	2	1	1	1	1	2	1	1	1	1	2	1	1	1	1	1
39	2	1	1	2	2	1	1	1	1	3	1	1	1	1	1	1	1	1	1	1	1	1	1	1	1
63	1	1	1	1	1	1	1	1	1	1	1	1	1	1	1	1	1	1	1	1	1	1	1	1	1
31	2	1	1	2	1	1	1	1	3	2	1	4	1	1	2	2	2	2	2	2	2	2	2	2	2
42	1	1	1	2	2	3	1	2	3	2	1	4	1	2	2	2	2	3	2	2	2	2	2	1	2
56	1	1	3	1	1	1	1	1	1	1	1	1	1	1	1	1	1	1	1	1	1	1	1	1	1
58	1	1	1	1	1	1	1	1	1	1	1	1	1	1	1	1	1	1	1	1	1	1	1	1	1
33	2	1	4	3	3	4	4	4	3	5	3	4	5	4	2	3	3	3	3	3	1	3	2	2	1
62	2	1	2	1	1	1	2	2	2	2	1	3	1	1	2	2	2	2	2	2	1	1	2	1	1
60	1	1	1	1	1	1	1	1	1	1	1	1	1	1	1	1	1	1	2	1	1	1	1	1	1
61	1	1	3	2	2	2	1	2	3	3	1	2	1	1	1	2	2	2	2	2	2	1	2	1	1
36	2	1	1	1	1	1	1	1	1	1	1	1	1	1	1	1	1	1	1	1	1	1	1	1	1
48	1	1	1	1	3	1	2	3	2	1	2	3	1	3	1	2	2	2	3	2	1	2	1	1	1
62	1	1	3	4	3	3	3	2	4	4	2	2	1	1	2	2	2	2	2	2	1	2	1	2	1
38	1	1	2	1	2	2	2	1	3	2	3	3	2	3	2	3	2	2	2	2	1	1	1	1	1
63	1	1	3	2	2	1	2	2	3	3	1	3	1	1	2	1	2	2	2	2	1	2	2	1	2
36	2	1	4	4	4	4	4	4	4	4	4	5	5	4	4	4	3	4	4	3	3	3	4	4	4
53	1	1	3	3	3	3	3	3	3	3	3	3	3	3	3	3	3	3	3	3	3	3	3	3	3
38	2	1	2	2	2	2	2	2	2	2	2	2	2	2	2	2	2	2	2	2	2	2	2	2	2
42	2	1	3	3	3	3	2	2	2	2	1	2	1	2	3	2	3	3	2	2	2	2	3	2	2
52	2	1	1	1	1	1	1	1	1	1	1	1	1	1	1	1	1	1	1	1	1	1	1	1	1
33	2	1	1	2	2	2	1	2	3	2	1	2	1	1	2	2	2	2	2	2	2	1	1	1	2
25	2	1	2	2	1	2	1	1	3	2	1	2	1	2	3	2	2	2	2	2	2	2	2	2	2
25	1	1	3	1	2	2	2	3	3	4	2	2	3	2	3	1	2	4	3	2	5	3	1	2	2
41	2	1	2	2	2	2	2	2	2	2	2	4	2	3	3	2	2	2	2	2	2	2	2	2	2
55	2	1	1	1	2	1	2	1	2	3	2	3	1	1	2	2	2	2	1	2	1	1	1	1	1
60	1	1	1	3	1	2	2	3	2	2	3	2	2	2	2	3	2	3	3	2	1	1	2	1	2
54	2	1	1	1	1	1	1	1	1	1	1	1	1	1	1	1	1	1	1	1	1	1	2	1	2
52	1	1	2	3	3	2	2	2	2	3	2	3	1	1	1	2	3	1	2	1	1	1	3	1	1
59	2	1	2	2	2	2	2	2	2	2	2	3	2	2	3	2	2	2	2	2	2	2	3	2	2
62	1	1	2	2	3	2	2	2	3	3	1	1	1	1	3	2	2	2	3	3	1	1	2	1	2
61	1	1	2	2	2	2	2	2	2	2	2	2	2	2	2	2	2	2	2	2	2	2	3	2	2
32	2	1	2	2	2	2	2	2	2	2	2	2	2	2	2	1	1	1	1	1	2	1	2	2	1
55	1	1	1	2	3	1	3	2	3	2	1	1	1	1	1	2	2	2	2	2	2	3	3	2	3
57	2	1	1	1	1	1	1	1	1	1	1	1	1	1	1	1	1	1	1	1	1	1	2	1	2
51	1	1	3	3	2	2	3	3	2	2	3	3	3	3	3	3	3	2	3	2	2	2	2	2	2
26	2	1	4	4	3	4	2	4	3	4	5	3	5	3	3	5	4	2	5	2	3	2	5	1	2
50	2	1	2	1	2	1	2	2	2	2	1	1	1	1	1	2	1	2	2	2	1	1	1	1	1
43	1	1	2	1	1	2	2	1	1	2	2	3	2	2	2	2	1	2	2	2	2	1	2	2	1
57	2	1	2	3	2	1	3	1	3	1	1	1	1	1	1	3	2	3	2	2	2	1	2	1	1
41	1	1	3	3	2	3	3	2	3	2	2	4	2	3	2	3	3	2	3	3	2	3	3	2	3
60	1	1	4	4	4	4	4	4	4	4	4	4	4	4	4	4	4	4	4	4	4	4	4	4	4
50	2	1	1	2	2	4	3	2	2	2	2	3	1	1	1	2	2	2	2	2	2	1	2	1	2
51	2	1	1	1	1	1	1	1	1	1	1	1	1	1	1	1	1	1	1	1	1	1	1	1	1
53	1	1	1	1	2	1	1	1	1	1	1	1	1	1	1	1	1	1	1	1	1	1	1	1	1
59	1	1	3	2	3	2	2	2	3	2	2	4	2	1	1	2	2	1	2	2	2	2	3	2	1
52	2	1	1	1	1	1	1	1	1	1	1	1	1	1	1	1	1	1	1	1	1	1	1	1	1
51	1	1	1	1	1	1	1	1	1	1	1	1	1	3	1	1	1	1	1	2	1	1	1	1	1
52	1	1	1	1	1	1	1	1	1	1	1	1	1	1	1	1	1	1	1	1	1	1	1	1	1
36	2	1	3	2	1	2	2	1	2	2	2	3	3	3	3	3	3	3	3	4	1	2	4	2	1
40	1	1	3	2	2	3	2	2	2	3	3	3	3	4	2	2	3	2	2	2	3	3	3	3	3
27	2	1	3	2	2	2	4	2	2	2	2	2	2	2	2	2	2	2	2	2	2	2	2	2	2
40	2	1	1	1	2	2	3	1	1	2	1	1	1	1	1	2	1	1	2	1	1	1	2	1	1
44	1	1	3	3	4	4	3	3	4	3	3	3	2	3	3	2	2	2	2	2	2	2	2	2	2
63	1	1	1	3	2	3	2	2	3	3	1	2	2	2	2	3	2	3	3	2	1	1	2	1	1
58	2	1	4	2	3	3	3	3	3	4	1	1	2	1	1	2	2	2	2	2	3	3	4	2	3
48	1	1	1	1	1	2	1	1	1	2	1	1	1	1	1	1	1	1	1	1	1	1	1	1	1
50	1	1	2	2	2	2	2	2	4	3	2	3	1	2	3	2	1	2	1	1	1	1	1	1	1
47	1	1	3	3	3	3	3	3	3	3	3	3	3	3	3	3	3	3	3	3	3	3	3	3	3
55	1	1	3	2	2	2	3	3	2	2	2	3	2	2	4	2	2	2	2	2	1	1	2	1	1
62	1	1	2	2	2	2	2	2	2	2	2	2	2	3	2	2	2	3	2	3	2	2	2	2	2
48	1	1	1	1	1	1	1	1	3	1	1	2	1	1	1	1	1	1	1	1	1	1	2	1	1
63	2	1	2	1	1	1	1	1	1	2	1	1	1	1	1	1	1	1	1	1	1	1	1	1	1
51	2	1	3	3	3	2	3	2	4	3	2	1	1	2	1	2	2	1	2	2	1	1	2	1	1
43	1	1	2	2	3	2	2	1	2	3	2	3	2	2	2	2	2	2	2	3	1	1	1	1	1
39	2	1	2	3	2	2	2	2	2	2	2	2	2	2	2	2	2	2	2	2	2	2	2	2	2
65	1	1	1	1	1	1	1	1	1	1	1	1	1	1	1	1	1	1	1	1	1	1	1	1	1
49	1	1	1	1	1	1	2	1	1	2	1	1	1	1	1	1	1	1	1	1	1	1	2	1	1
41	1	1	2	1	2	1	1	2	1	2	1	1	1	1	1	1	1	1	2	2	1	1	1	1	1
34	1	1	4	4	3	3	5	4	3	2	4	3	5	4	4	4	4	3	3	2	3	2	4	3	3
51	2	1	1	2	1	1	2	1	3	3	1	1	1	2	2	2	2	2	2	2	2	2	2	2	2
40	1	1	3	3	3	3	3	3	3	3	3	3	3	3	3	3	3	3	3	3	3	3	3	3	3
47	1	1	2	2	2	2	2	3	2	3	2	4	2	2	3	2	2	2	2	2	1	1	1	1	1
30	1	1	2	2	2	2	2	2	2	2	2	2	2	2	3	2	2	1	2	2	2	2	3	2	2
35	2	1	2	2	2	2	3	3	2	3	2	2	2	2	2	2	2	2	2	2	2	2	2	2	2
31	2	1	3	3	3	3	3	3	3	3	3	3	3	3	3	3	3	4	4	3	4	2	4	4	3
41	1	1	4	3	3	3	2	3	4	3	2	3	3	2	2	3	3	2	3	3	2	3	3	2	2
43	2	1	1	1	1	1	1	1	3	2	1	1	1	1	1	1	1	1	1	1	1	1	1	1	1
61	2	1	2	3	2	3	2	3	2	2	2	2	2	2	1	2	2	2	2	2	1	1	1	1	1
34	2	1	1	1	2	1	2	2	2	3	2	2	1	2	1	3	3	2	3	2	1	2	3	2	1
54	2	1	2	2	2	2	2	2	2	2	2	2	2	2	2	2	2	2	2	2	2	2	2	2	2
51	1	1	1	1	1	1	1	1	2	2	1	1	1	2	2	1	1	1	1	1	1	1	1	1	1
55	1	1	2	2	2	1	2	1	2	3	2	2	2	2	2	4	2	1	2	2	1	1	2	1	1
38	2	1	2	2	2	2	2	2	2	2	1	2	1	1	4	2	3	3	2	2	3	3	4	2	3
48	2	1	2	2	2	3	3	1	2	3	1	2	1	1	1	2	1	1	1	2	1	1	1	1	1
62	2	1	2	1	3	2	1	1	2	2	1	2	2	1	2	2	2	1	2	2	2	3	1	1	1
40	1	1	2	2	2	2	2	2	2	2	2	2	2	2	2	3	3	3	3	3	3	3	3	3	3
38	2	1	3	3	3	3	3	3	3	3	4	4	4	4	4	3	3	3	3	3	3	3	3	3	3
60	2	1	1	1	2	1	2	2	1	2	1	1	2	1	2	2	2	2	2	2	2	2	3	1	2
23	2	1	3	2	2	2	3	1	4	3	1	2	1	2	2	3	1	2	3	4	3	3	2	5	3
52	2	1	1	2	2	2	1	1	1	2	2	3	2	1	1	2	2	1	2	2	1	1	2	1	2
23	1	1	5	2	3	4	2	2	3	4	4	4	5	4	3	3	4	3	3	4	4	4	5	5	3
27	2	1	2	2	3	2	2	2	2	2	1	1	1	1	1	2	2	1	2	2	1	1	2	1	1
31	1	1	2	3	2	3	2	2	2	3	2	4	2	3	3	2	3	2	2	2	2	2	3	2	2
45	2	1	3	2	3	3	3	3	3	3	3	4	2	2	1	3	1	1	1	2	1	1	1	1	1
29	2	1	4	4	3	3	4	3	3	3	4	3	4	3	3	4	4	3	4	3	3	3	3	4	3
53	2	1	2	2	2	3	2	2	2	3	1	1	1	1	1	2	2	2	2	2	2	2	2	2	2
49	2	1	2	2	2	2	3	2	2	2	2	2	2	2	2	2	2	2	4	2	2	2	2	2	2
62	1	1	1	1	1	1	1	1	1	1	1	1	1	1	1	1	1	1	1	1	1	1	1	1	1
40	1	1	2	1	1	2	2	3	2	3	2	2	1	2	1	2	2	2	2	2	1	1	3	1	3
58	2	1	2	1	1	2	1	1	1	1	1	1	1	1	1	1	1	1	1	1	1	1	1	1	1
62	2	1	2	2	2	2	2	2	2	2	2	2	2	2	2	2	2	2	2	3	2	2	2	2	2
31	1	1	2	1	1	1	1	1	1	1	1	1	1	1	1	1	1	1	1	1	1	1	1	1	1
39	2	1	1	2	1	1	1	1	1	1	1	1	1	1	1	2	1	1	1	2	1	1	2	1	1
58	2	1	2	1	2	1	3	1	2	2	2	2	2	2	3	1	2	2	2	2	1	1	1	1	1
43	1	1	3	3	3	3	2	3	3	3	1	1	1	1	1	3	3	3	3	3	2	3	3	2	2
42	2	1	3	3	4	3	4	3	3	4	2	2	2	2	2	1	1	1	2	1	1	1	2	1	1
53	2	1	1	1	3	3	3	2	1	3	1	2	1	1	1	1	1	1	1	1	1	1	2	2	1
49	1	1	1	2	2	2	1	1	2	3	1	1	1	1	1	1	1	1	1	2	1	1	2	1	2
62	1	1	1	1	1	1	1	1	1	1	1	1	1	1	1	2	2	2	2	2	2	2	2	2	2
59	2	1	2	1	3	3	3	4	3	4	5	2	1	1	1	2	1	1	1	1	1	1	1	1	1
46	2	1	1	1	1	1	1	1	1	1	1	1	1	1	1	1	1	1	1	2	1	1	2	1	1
55	2	1	2	2	2	3	2	1	3	3	2	2	1	1	2	2	1	1	2	2	1	1	2	1	1
20	1	1	1	1	2	1	1	1	2	2	1	1	2	2	1	2	1	2	2	1	1	2	2	2	1
61	1	1	2	2	2	2	2	3	2	2	3	3	3	3	3	3	2	2	3	3	1	1	1	1	1
56	2	1	2	1	1	2	2	2	2	2	1	2	1	1	2	1	1	2	2	2	1	2	1	1	2
27	2	1	2	2	3	2	3	2	3	3	2	2	2	2	2	2	3	2	2	2	2	2	2	2	2
51	2	1	1	2	3	2	3	1	1	1	2	2	3	1	2	2	2	2	2	2	1	1	2	1	1
57	1	1	1	2	1	1	1	1	1	2	1	2	1	2	2	1	1	1	1	2	1	1	2	1	1
34	1	1	1	1	1	1	1	1	1	1	1	1	1	1	1	1	1	1	1	1	1	1	1	1	1
61	2	1	2	2	2	2	2	2	2	2	2	3	2	2	2	2	2	2	2	2	2	2	2	2	2
40	1	1	1	1	1	3	3	1	1	2	5	2	4	5	3	3	3	3	3	3	4	4	5	1	4
49	2	1	3	3	3	3	3	3	3	3	2	3	2	2	1	3	2	2	2	2	1	2	2	1	1
52	2	1	2	2	2	2	2	1	2	2	2	3	1	1	1	2	2	2	2	2	1	1	2	1	1
47	2	1	2	2	1	2	2	2	3	3	1	1	1	2	1	2	2	2	2	1	5	3	3	1	2
53	2	1	2	2	2	2	2	2	2	2	2	2	1	1	2	2	2	2	2	2	2	2	2	2	2
42	1	1	2	1	3	2	2	1	2	2	2	2	1	1	2	2	2	1	1	2	2	1	2	2	2
53	2	1	3	3	3	3	3	3	3	3	3	3	2	3	3	2	2	2	3	1	1	1	1	1	1
41	1	1	3	3	3	3	3	3	3	3	3	3	3	3	3	3	3	3	3	3	3	3	3	3	3
42	1	1	1	1	1	1	1	1	3	1	1	1	1	1	1	1	1	1	1	1	1	1	1	1	1
48	2	1	2	2	3	4	2	2	3	4	1	1	1	1	1	2	2	3	2	3	1	1	1	1	1
49	1	1	1	2	1	1	3	2	1	1	2	3	1	2	1	2	1	1	2	1	1	1	1	1	1
43	1	1	2	2	2	2	2	2	2	2	2	2	2	2	2	2	2	2	2	2	2	2	3	2	2
53	2	1	1	3	1	2	1	1	2	2	1	3	2	2	2	2	2	2	2	2	2	2	2	2	2
45	1	1	3	3	2	3	3	3	3	4	3	3	4	3	4	2	2	3	3	2	3	2	3	3	2
44	1	1	3	3	3	3	3	3	3	3	3	3	3	3	3	3	3	3	3	3	3	3	3	3	3
45	2	1	2	2	2	2	2	2	2	2	2	2	2	2	2	1	1	1	1	1	1	1	1	1	1
42	1	1	2	1	2	2	1	3	3	3	1	1	1	1	2	3	2	3	3	2	1	1	1	1	1
62	2	1	1	1	1	1	1	1	2	2	1	1	1	1	1	1	1	1	1	1	1	1	1	1	1
57	2	1	3	3	4	3	4	3	4	4	2	2	2	2	2	3	3	3	3	2	2	2	2	2	3
23	1	1	1	5	2	5	2	2	3	3	2	1	3	4	4	1	1	1	1	1	2	2	2	2	2
42	1	1	3	3	3	3	3	3	3	3	3	3	3	3	3	3	3	3	3	3	3	3	3	3	3
41	1	1	3	1	1	2	2	1	1	2	2	4	2	2	2	2	1	1	2	2	3	3	2	3	3
51	1	1	3	2	2	2	2	2	3	3	3	3	3	2	3	2	2	2	2	2	3	3	3	3	3
58	1	1	1	3	2	1	4	3	1	1	4	2	3	3	4	2	2	2	3	2	2	1	2	2	2
57	1	1	2	1	2	2	3	2	1	2	1	2	2	1	2	3	1	1	3	1	2	1	1	1	3
33	1	1	2	2	2	2	2	2	3	2	2	2	2	2	2	2	2	2	2	2	2	2	2	2	2
51	2	1	1	1	2	2	2	1	2	1	1	3	1	1	3	1	1	1	1	2	1	1	2	1	1
31	2	1	3	1	1	1	2	2	1	2	1	3	1	1	1	2	2	2	2	2	1	2	2	1	1
42	2	1	3	2	3	3	3	3	3	3	3	3	3	3	3	2	2	2	2	2	2	2	2	2	2
42	1	1	1	1	2	1	1	1	2	1	2	4	2	2	1	1	1	1	1	2	1	1	2	1	1
48	1	1	2	1	2	1	3	2	3	2	2	2	2	2	2	2	2	2	2	2	1	1	2	1	1
52	1	1	3	2	2	2	1	2	3	3	2	2	1	1	2	2	2	2	2	2	2	2	2	2	2
62	2	1	1	1	2	1	1	1	1	2	1	1	1	1	1	1	1	1	1	2	1	1	1	1	1
54	1	1	2	2	2	2	2	2	2	3	1	2	1	1	1	2	1	2	2	2	1	2	2	2	3
38	2	1	3	3	4	4	3	3	5	4	4	4	4	4	4	3	3	3	3	3	2	4	4	3	3
47	2	1	2	2	2	2	2	2	3	2	2	2	2	2	2	2	2	2	2	2	2	2	2	2	2
41	1	1	2	1	1	2	2	1	2	1	1	1	1	1	2	1	1	1	2	1	1	1	3	1	2
45	1	1	2	1	1	1	1	1	1	2	1	1	2	1	2	1	2	1	1	1	1	1	2	1	1
51	1	1	3	2	2	2	1	2	2	2	1	2	1	1	1	1	1	1	2	2	1	1	1	1	1
56	1	1	1	1	1	1	1	1	1	1	1	1	1	1	1	1	1	1	1	2	1	1	3	1	1
41	1	1	3	4	3	3	4	3	3	3	3	2	3	2	2	3	3	2	4	2	3	3	2	3	3
48	2	1	1	1	1	2	1	2	2	3	2	2	2	1	2	2	2	2	2	2	2	2	2	2	2
42	2	1	3	3	3	3	3	3	3	3	3	3	3	3	3	3	3	3	3	3	3	3	3	3	3
43	2	1	1	1	1	2	1	1	3	3	1	2	1	1	1	1	1	2	1	1	1	1	1	1	1
43	1	1	4	3	4	4	4	4	4	4	3	4	3	4	3	3	4	3	3	3	2	4	3	3	4
43	1	1	1	3	3	2	3	2	2	2	2	4	1	2	3	2	2	1	2	3	2	2	3	1	2
29	1	1	3	4	3	4	3	3	4	3	4	3	4	4	4	3	4	3	4	3	3	3	4	3	3
25	1	1	2	3	4	4	2	3	4	3	4	4	3	3	3	4	3	2	4	2	3	2	3	3	3
25	2	1	2	2	3	2	3	1	2	2	1	1	1	1	1	1	1	1	2	2	1	1	3	1	1
29	1	1	3	3	3	3	3	3	3	3	3	3	3	3	3	3	3	3	3	3	3	3	3	3	3
33	2	1	2	1	1	2	2	1	1	1	1	1	1	1	1	1	2	1	2	1	1	1	2	1	1
34	1	1	3	3	3	3	3	3	3	3	3	3	3	3	3	3	3	3	3	3	3	3	3	3	3
24	2	1	2	5	5	2	2	2	2	2	2	2	4	3	5	1	4	1	1	1	1	4	5	4	2
22	2	1	1	1	1	2	2	1	2	2	1	1	1	1	1	1	1	1	1	1	1	1	1	1	1
20	1	1	2	2	3	2	3	3	2	2	2	2	3	2	3	2	2	3	2	2	2	2	3	2	3
31	2	1	1	2	1	1	1	2	1	1	3	3	1	3	5	3	1	1	3	2	1	1	2	1	1
26	1	1	1	2	2	2	2	1	2	3	2	4	1	2	2	2	2	2	2	3	1	1	2	1	1
59	1	1	2	3	2	3	3	3	3	3	2	3	3	3	3	3	3	3	3	2	3	3	3	4	3
54	2	1	2	2	2	2	2	2	2	2	2	2	2	2	3	2	2	3	2	2	3	2	3	1	3
19	2	1	3	2	1	2	2	1	4	3	1	2	1	1	1	1	1	1	1	2	1	1	1	1	1
59	2	1	1	2	3	3	1	1	3	4	1	1	1	2	1	1	1	1	1	2	1	1	1	1	1
40	1	1	1	2	1	1	1	2	1	1	1	1	1	1	1	1	1	1	2	1	1	1	1	1	1
50	1	1	1	2	2	2	2	1	2	2	3	3	1	1	2	2	2	2	2	2	2	2	2	2	2
32	2	1	2	1	1	1	1	2	1	2	1	4	1	1	1	1	1	1	2	1	1	1	1	1	1
40	1	1	3	1	1	4	1	1	1	5	1	5	3	1	3	1	1	1	1	1	1	1	1	1	1
54	2	1	2	2	2	3	3	3	2	3	2	2	2	2	3	3	3	3	3	3	2	2	3	2	2
56	1	1	1	2	1	1	1	1	1	1	1	1	1	1	1	1	1	1	1	2	1	1	1	1	2
42	2	1	3	4	3	4	4	4	4	4	3	3	3	2	2	4	4	4	4	3	3	4	3	3	3
47	1	1	2	1	1	2	1	1	1	1	1	1	1	1	1	1	1	1	1	1	1	1	1	1	1
48	1	1	3	3	3	3	3	3	3	3	3	3	3	3	3	3	3	3	3	3	3	3	3	3	3
25	1	1	1	3	2	2	4	3	4	3	3	3	2	3	4	3	1	2	2	2	2	3	3	4	3
59	1	1	2	1	1	1	1	1	1	1	1	1	1	1	1	1	1	1	1	1	1	1	1	1	1
41	2	1	2	2	2	2	2	2	2	3	1	3	1	1	2	2	2	2	2	2	2	2	2	2	2
24	2	1	3	2	2	2	3	3	2	3	3	3	2	2	4	2	2	2	3	3	1	1	2	1	1
27	2	1	3	2	2	2	2	4	3	3	3	3	3	2	2	2	3	2	2	2	3	2	3	4	4
61	1	1	3	1	1	1	1	1	2	2	1	3	1	2	2	2	1	2	2	3	1	1	1	1	1
48	1	1	4	4	3	4	3	4	2	3	3	1	3	3	3	2	2	2	2	2	3	3	4	2	2
49	2	1	1	1	1	1	1	1	1	1	1	1	1	1	1	1	1	2	1	2	1	1	1	1	1
64	1	1	3	3	3	3	3	3	3	3	3	3	3	3	3	3	3	3	3	3	3	3	3	3	3
39	2	1	1	2	1	3	2	1	3	1	2	3	1	1	2	1	1	2	2	1	1	1	2	1	1
43	1	1	4	5	3	4	3	4	5	4	4	5	4	4	5	3	4	4	3	4	4	4	4	4	4
34	1	1	1	3	1	3	2	2	2	4	3	2	3	4	2	1	2	3	2	3	1	4	3	3	2
54	2	1	2	1	2	3	3	1	1	2	1	3	1	1	1	1	1	1	1	1	1	1	1	1	1
32	1	1	3	2	3	3	2	3	3	2	2	2	2	3	3	3	3	3	2	2	3	3	2	2	2
60	1	1	2	2	2	2	2	2	2	2	2	2	2	2	2	2	2	2	2	2	2	2	2	2	2
59	1	1	2	2	2	2	2	2	2	2	2	2	2	2	2	2	2	2	2	2	2	2	2	1	2
41	2	1	2	2	2	2	2	2	2	2	1	1	1	1	1	2	2	2	2	2	1	1	1	1	1
24	2	1	1	1	2	1	2	2	1	1	1	1	1	1	1	1	1	1	2	1	1	1	1	1	1
25	1	1	2	2	2	3	3	3	1	1	4	3	3	4	4	3	2	3	2	2	1	2	2	1	3
20	2	1	2	1	2	2	2	2	1	2	3	3	3	3	3	2	2	2	1	2	1	2	3	2	2
37	2	1	3	1	2	2	3	2	3	3	2	1	1	1	1	3	2	2	3	1	2	1	3	1	1
20	2	1	3	3	3	3	3	3	3	3	3	3	3	3	3	3	3	3	3	3	3	3	3	3	3
24	2	1	2	2	2	2	2	2	2	3	2	2	2	2	2	2	2	2	2	2	1	2	2	2	2
56	1	1	2	2	2	2	2	2	2	2	2	2	2	2	2	2	2	2	2	2	2	2	2	2	2
29	2	1	1	2	1	1	1	1	3	3	1	2	1	1	1	2	1	2	1	2	1	1	2	1	1
24	1	1	1	1	1	1	1	1	2	1	1	1	1	1	1	1	1	1	1	2	1	1	1	1	1
64	1	1	1	2	1	1	1	1	2	2	1	2	1	1	2	1	1	1	1	1	1	1	1	1	1
48	2	1	2	1	2	1	1	2	2	1	1	1	1	1	2	1	1	1	1	1	1	1	2	1	1
63	2	1	2	1	2	1	2	1	1	2	1	1	1	1	1	1	1	1	1	1	1	1	3	1	2
62	1	1	1	1	2	3	2	1	3	3	1	1	1	1	1	1	1	1	2	1	1	1	2	1	2
59	1	1	3	3	2	2	3	4	2	3	5	3	4	3	3	2	3	3	3	5	3	2	4	2	3
38	2	1	2	2	2	2	2	2	2	2	2	2	2	2	2	2	2	2	2	2	2	2	2	2	2
54	2	1	2	2	3	2	2	3	2	2	3	3	2	3	4	2	2	2	3	2	2	2	2	2	2
31	1	1	2	2	2	2	2	2	2	2	2	2	1	2	2	2	2	2	2	2	2	2	2	2	2
48	1	1	2	3	4	4	4	2	4	4	3	3	2	3	1	1	1	1	1	3	1	1	3	1	2
20	2	1	4	3	2	3	5	3	2	2	2	3	2	2	2	2	2	2	2	2	2	2	3	2	2
26	1	1	2	2	2	2	2	2	2	2	2	2	2	2	2	2	2	2	2	2	2	2	2	2	2
21	1	1	2	2	2	3	1	2	3	3	2	3	2	2	2	2	2	2	3	2	1	1	1	1	1
38	2	1	5	5	5	5	5	5	5	5	5	5	5	4	5	1	1	1	1	1	1	1	1	1	1
21	1	1	3	3	3	3	3	3	3	3	3	3	3	3	3	3	3	3	3	3	3	3	3	3	3
52	2	1	2	2	2	2	2	2	2	2	2	2	2	2	2	2	2	2	2	2	2	2	2	2	2
62	1	1	3	3	4	3	4	4	4	4	3	3	3	3	3	3	3	3	3	3	3	3	3	3	3
26	2	1	3	3	2	3	2	2	2	3	3	3	2	3	2	3	3	3	3	3	3	3	3	3	3
24	1	1	2	2	2	2	4	3	2	2	2	2	3	1	3	3	3	2	3	2	2	2	3	2	2
20	1	1	3	3	2	3	3	2	4	3	3	4	2	3	3	2	2	3	2	3	2	1	3	1	1
28	1	1	3	4	4	3	3	3	3	4	4	3	3	4	4	3	4	3	3	4	4	3	4	5	2
19	2	1	1	1	2	2	3	2	4	3	1	1	1	1	1	2	1	1	2	2	1	1	2	1	1
23	1	1	2	3	3	3	3	3	3	3	1	1	1	1	1	2	2	2	2	2	1	1	1	1	1
20	2	1	2	4	1	4	3	3	4	1	1	2	2	2	3	1	1	1	1	1	1	1	1	1	1
23	1	1	3	4	3	4	3	3	3	4	4	4	4	4	4	2	3	3	3	2	3	3	3	3	3
24	2	1	4	1	2	3	4	2	1	4	4	4	3	2	4	2	2	2	3	1	4	4	4	4	4
23	2	1	2	2	2	2	2	2	2	2	1	1	2	1	1	3	3	3	3	3	1	1	1	1	2
19	2	1	3	4	3	3	4	3	3	4	3	3	3	2	2	3	2	2	2	2	3	2	2	3	2
21	2	1	2	2	2	2	2	2	3	2	2	3	3	1	2	2	2	2	2	2	2	2	2	2	3
24	2	1	2	4	3	4	4	3	4	4	1	4	3	1	1	1	1	2	1	1	1	1	1	1	1
47	2	1	1	1	1	1	1	1	1	1	1	1	1	1	1	2	2	1	1	1	1	1	1	1	1
48	2	1	1	1	1	1	1	1	1	1	1	1	1	1	1	1	1	1	1	1	1	1	1	1	1
57	2	1	1	1	2	2	1	1	2	2	2	4	1	2	1	1	1	1	1	1	1	1	1	1	1
42	2	1	2	2	2	2	2	2	2	2	2	2	2	2	2	2	2	2	2	2	2	2	2	2	2
34	1	1	2	2	2	2	2	2	2	3	1	1	1	2	1	1	1	1	1	1	1	1	2	1	2
57	1	1	2	2	2	2	2	3	2	3	2	3	1	2	3	1	1	1	1	1	2	3	3	2	3
56	1	1	1	1	1	1	1	1	1	1	1	2	1	1	1	1	1	2	2	2	1	1	1	1	1
48	1	1	1	1	1	1	1	1	1	1	1	1	1	1	1	1	1	1	1	1	1	1	1	1	1
45	1	1	2	2	2	1	2	2	3	3	1	1	1	1	1	2	3	2	3	2	1	2	3	1	1
45	1	1	2	1	2	2	1	1	1	1	1	1	1	1	1	1	1	1	1	1	1	1	1	1	1
60	1	1	2	4	5	4	4	4	3	3	3	3	2	2	3	3	2	3	2	2	2	3	3	2	3
58	1	1	3	3	4	3	2	3	2	2	5	3	4	3	3	3	3	4	2	3	5	3	2	3	4
62	1	1	2	2	2	2	2	2	3	2	1	2	1	2	2	2	2	3	2	3	2	1	2	1	2
30	1	1	2	2	2	2	2	2	2	2	2	2	1	2	2	2	2	2	2	2	2	2	2	1	2
31	1	1	1	2	2	2	3	2	3	1	1	1	1	2	1	2	2	2	2	2	1	1	2	1	2
61	1	1	2	2	2	2	2	2	2	2	2	2	2	2	2	2	2	2	2	2	2	2	2	2	2
27	2	1	3	3	3	3	3	3	3	3	3	3	3	3	3	2	2	3	2	3	3	2	2	3	3
30	2	1	3	2	2	2	3	2	2	2	2	3	2	2	2	3	3	2	3	2	2	2	3	3	2
54	1	1	1	1	1	1	1	1	1	1	1	1	1	1	1	1	1	1	1	1	1	1	1	1	1
61	1	1	2	3	3	3	2	2	3	2	1	1	1	1	1	3	3	2	3	1	1	1	2	1	1
64	1	1	1	1	1	1	1	1	1	3	1	1	1	1	1	1	1	1	1	1	1	1	1	1	1
56	2	1	1	1	1	1	2	1	1	2	1	1	1	1	1	2	1	1	2	1	1	1	1	1	1
61	1	1	1	2	1	2	1	1	2	2	2	3	1	2	2	1	1	1	1	3	1	1	3	1	1
23	2	1	3	2	3	1	4	2	3	4	2	4	2	1	1	3	2	3	2	2	2	1	3	1	2
61	1	1	1	1	1	1	1	1	1	1	1	2	1	1	2	1	1	1	1	2	1	1	1	1	1
59	1	1	2	2	1	1	2	1	2	2	2	2	2	2	2	2	2	2	3	3	2	1	2	1	2
61	1	1	2	2	2	2	2	2	3	3	1	1	1	1	2	2	1	1	2	1	2	1	2	1	1
44	2	1	2	1	2	1	2	2	2	2	2	2	1	1	1	2	2	2	2	2	2	2	2	2	2
24	2	1	2	1	1	2	3	1	3	3	1	1	1	1	1	1	1	1	1	2	1	1	1	1	1
28	2	1	3	3	3	3	3	3	3	3	3	3	3	3	2	2	2	2	2	2	2	2	2	2	2
65	1	1	2	2	1	2	2	2	2	2	1	2	1	1	2	2	2	3	2	2	2	2	3	1	1
58	2	1	1	1	1	1	1	1	1	1	1	1	1	1	1	1	1	1	1	1	1	1	1	1	1
62	1	1	3	3	2	2	3	2	3	2	1	1	2	1	1	2	2	1	3	2	1	1	2	1	1
54	1	1	2	2	1	1	1	1	2	2	2	1	2	2	1	2	1	1	1	2	1	1	2	1	1
57	1	1	2	2	1	2	2	2	1	3	1	1	1	2	1	1	1	1	1	1	1	1	2	1	1
57	1	1	2	2	2	2	2	2	2	2	2	2	2	2	2	2	2	2	2	2	2	2	2	2	2
25	2	1	3	3	3	3	3	3	3	3	3	3	3	3	3	3	3	3	3	3	3	3	3	3	3
63	1	1	2	2	2	2	2	2	3	3	2	3	2	2	2	2	2	2	2	2	2	2	2	2	2
37	1	1	1	2	2	1	2	2	2	2	2	2	1	2	1	1	1	1	2	2	1	1	1	1	1
47	1	1	1	1	1	1	1	1	1	1	1	1	1	1	1	1	1	1	1	1	1	1	1	1	1
36	1	1	2	2	2	2	3	3	3	3	2	3	2	3	3	4	3	3	3	3	3	3	3	2	2
49	1	1	1	1	1	1	1	1	1	2	1	1	1	1	1	1	1	1	1	1	1	1	1	1	1
43	1	1	2	3	2	3	2	2	3	3	2	1	2	2	3	2	2	3	3	1	2	2	2	2	2
57	1	1	2	2	2	2	2	2	2	2	2	2	2	2	2	2	3	2	3	2	2	2	3	2	2
64	2	1	2	2	2	2	2	2	2	2	2	2	2	2	2	2	2	2	2	2	2	2	2	2	2
59	2	1	1	1	1	1	1	1	1	1	1	1	1	1	1	1	1	1	1	1	1	1	1	1	1
20	1	1	3	3	3	3	3	3	3	3	3	3	3	3	3	3	3	3	3	3	3	3	3	3	3
52	1	1	2	2	3	2	5	3	3	3	1	2	2	1	1	2	2	1	2	2	1	1	2	1	1
61	2	1	1	1	1	1	1	1	1	1	1	1	1	1	1	1	1	1	1	1	1	1	1	1	1
47	2	1	2	1	2	2	2	2	2	2	2	2	2	2	1	2	2	2	2	2	2	2	2	2	2
63	2	1	2	2	2	2	2	2	2	2	2	2	2	1	2	2	2	2	2	2	2	3	2	2	2
37	2	1	4	3	4	3	3	4	3	4	3	3	3	4	4	4	4	3	3	3	5	4	3	4	5
56	2	1	1	1	1	1	1	1	1	1	1	1	1	1	1	1	1	1	1	1	1	1	1	1	1
48	1	1	1	2	1	1	1	1	1	2	1	1	2	1	1	2	2	2	2	2	2	2	3	2	2
47	1	1	3	3	2	1	2	2	3	3	1	1	1	1	1	2	2	1	2	2	1	1	3	1	2
50	1	1	1	2	2	2	2	2	3	2	2	1	1	2	2	1	1	1	2	1	2	2	2	1	2
31	1	1	1	1	1	1	2	1	1	1	1	1	1	1	1	1	1	1	1	1	1	1	1	1	1
54	2	1	2	2	2	2	2	2	1	2	2	2	1	2	2	2	2	2	2	2	1	1	2	1	1
65	2	1	1	1	1	2	1	1	2	1	1	1	1	1	1	1	2	1	2	1	1	1	1	1	1
44	2	1	1	2	1	1	2	1	1	1	1	3	3	1	1	4	1	1	1	1	1	1	1	1	1
43	2	1	2	2	2	3	2	2	2	4	2	2	2	2	3	2	2	4	2	2	2	3	3	2	3
25	2	1	4	2	2	2	2	2	3	3	2	2	2	2	2	2	2	2	2	3	2	2	2	2	2
40	2	1	1	1	1	1	1	1	1	1	1	1	1	1	1	1	1	1	1	1	1	1	1	1	1
49	1	1	3	3	3	3	3	3	3	4	2	3	2	2	2	2	2	2	2	2	2	2	2	2	2
48	1	1	3	2	2	2	3	2	2	3	3	1	1	2	3	2	2	2	2	2	1	1	1	1	1
23	2	1	2	2	2	2	3	2	2	3	2	3	2	3	2	2	2	2	2	2	2	3	2	3	3
50	1	1	2	2	2	2	3	2	2	2	2	3	2	3	3	2	2	2	2	2	2	2	2	2	2
42	1	1	4	2	3	3	2	2	4	3	2	5	4	1	3	2	2	3	2	3	4	3	2	2	3
44	2	1	2	1	1	1	1	1	1	1	1	1	1	1	2	2	2	2	2	2	2	1	2	1	1
56	2	1	1	1	1	1	1	1	1	1	1	1	1	1	1	1	1	1	1	1	1	1	1	1	1
21	1	1	2	3	4	3	3	4	3	4	3	3	2	4	3	2	3	3	4	3	2	3	3	3	3
31	2	1	1	1	1	1	1	1	1	2	1	1	1	1	1	1	1	1	1	1	1	1	1	1	1
47	1	1	3	2	3	2	3	2	2	3	2	2	1	2	2	2	2	2	2	2	1	1	3	1	1
55	2	1	1	1	1	1	1	1	1	1	2	2	1	1	1	2	1	2	1	2	1	1	2	1	1
48	1	1	1	1	1	1	1	1	1	1	1	1	1	1	1	1	1	1	1	1	1	1	1	1	1
56	2	1	1	2	2	3	2	2	3	3	1	2	1	1	1	1	1	1	1	1	1	1	1	1	1
47	2	1	1	1	1	1	1	1	1	1	1	1	1	1	1	2	2	1	1	1	1	2	3	2	2
67	2	1	3	3	3	3	3	3	3	3	3	3	3	3	3	3	3	3	3	3	3	3	3	3	3
43	1	1	4	3	2	3	3	3	3	3	2	3	2	2	2	2	2	2	2	2	1	1	1	1	1
50	2	1	3	2	2	2	2	2	2	2	1	1	1	1	1	2	2	2	2	2	1	1	2	1	1
54	1	1	1	2	2	2	1	1	1	1	1	2	1	2	2	1	2	2	2	2	1	1	2	1	2
47	1	1	2	2	2	2	2	2	2	2	3	3	2	2	3	2	2	2	2	2	1	1	1	1	2
38	2	1	2	2	2	1	2	2	2	3	1	1	1	1	1	1	1	1	1	1	1	1	1	1	1
43	1	1	2	1	1	2	1	1	2	2	1	1	1	1	1	1	1	2	1	2	1	1	2	1	1
53	1	1	2	2	2	2	2	2	2	2	2	2	2	2	2	2	2	2	2	2	2	2	2	2	2
41	2	1	2	4	1	3	2	3	5	4	3	1	2	4	2	3	2	5	2	4	2	4	3	1	2
33	1	1	2	3	2	2	3	3	2	2	3	3	3	2	2	2	2	2	2	3	3	2	3	3	3
44	1	1	1	1	1	1	1	1	1	1	1	1	1	1	1	1	1	1	1	1	1	1	1	1	1
22	1	1	4	2	3	2	3	2	5	4	1	3	2	1	1	4	3	3	2	3	3	5	3	4	4
18	1	1	2	2	2	2	4	2	2	2	1	2	1	1	1	2	2	2	2	2	1	1	1	1	1
33	1	1	2	3	4	3	3	3	3	3	3	3	3	4	4	3	4	3	4	3	2	3	3	3	3
56	1	1	1	1	1	2	1	1	2	2	1	2	1	1	3	1	1	1	2	1	4	2	2	1	1
42	2	1	2	2	1	2	1	2	2	3	1	1	1	1	2	2	1	1	2	2	1	1	2	1	2
45	2	1	2	2	2	2	2	2	2	2	2	2	1	2	2	1	1	1	1	1	1	1	1	1	1
54	2	1	1	3	2	2	2	1	2	2	1	1	1	1	1	1	2	1	1	2	1	1	1	1	1
45	2	1	2	2	2	2	2	2	2	2	2	2	2	2	2	2	2	2	2	2	2	2	2	2	2
38	2	1	4	3	3	3	4	4	4	4	3	3	3	3	3	3	3	2	2	3	3	3	3	3	3
40	1	1	2	2	2	2	2	2	2	2	2	2	2	2	2	2	2	2	2	2	2	2	2	2	2
53	2	1	3	3	3	3	3	4	2	3	2	1	2	1	2	2	2	2	2	2	1	2	3	1	2
34	1	1	2	2	2	3	3	3	3	3	4	3	3	4	4	2	2	2	2	2	2	2	3	2	2
31	2	1	2	2	2	2	2	2	2	2	2	2	2	2	2	2	2	2	2	2	2	2	2	2	2
42	2	1	1	1	1	1	1	1	1	1	1	1	1	1	1	1	1	1	1	1	1	1	1	1	1
39	2	1	1	1	1	1	1	2	1	1	1	3	1	2	1	1	1	1	1	1	2	2	3	2	3
49	2	1	1	1	1	2	2	1	1	2	1	2	1	1	1	2	2	2	2	2	1	1	2	1	2
40	2	1	3	3	4	4	5	3	3	4	2	4	3	4	2	3	3	3	3	3	2	2	2	1	1
52	2	1	1	1	2	1	1	1	1	3	1	1	1	1	2	2	2	1	2	2	1	1	1	1	1
51	2	1	2	2	1	2	2	1	1	2	1	1	1	1	1	2	2	2	2	2	1	1	2	1	1
36	2	1	3	3	3	3	3	3	2	3	2	4	3	2	2	2	2	2	2	2	2	1	3	1	1
44	2	1	1	1	1	1	1	1	3	1	1	1	1	1	1	1	1	1	1	1	1	1	1	1	1
29	1	1	2	2	4	4	3	4	3	3	3	5	4	3	5	3	2	2	4	4	4	5	5	3	1
27	1	1	3	3	3	3	3	3	3	3	3	3	3	3	3	3	3	3	3	3	3	3	3	3	3
36	2	1	2	3	2	1	1	1	1	3	1	1	1	1	1	2	1	1	1	2	1	1	2	1	1
40	1	1	3	3	3	3	3	3	3	3	3	3	3	3	3	3	3	3	3	3	3	3	3	3	3
19	1	1	2	2	2	2	2	2	2	2	3	3	2	2	3	2	2	2	2	3	2	2	3	2	2
50	1	1	2	2	4	2	2	2	3	4	2	2	2	2	2	3	2	3	3	2	1	1	2	1	1
47	2	1	1	1	1	1	1	1	1	1	1	1	1	1	1	1	1	1	1	1	1	1	1	1	1
34	2	1	2	2	2	2	2	2	2	2	2	2	2	2	2	1	1	1	1	1	1	1	2	1	1
36	1	1	2	2	2	2	2	2	2	2	2	2	2	2	2	2	2	2	2	2	2	2	2	2	2
45	1	1	3	3	3	3	3	4	4	4	2	2	4	3	3	2	2	3	2	3	4	3	3	3	2
45	1	1	2	2	3	3	4	4	4	3	2	3	4	4	3	4	3	2	2	3	4	3	4	3	2
28	2	1	1	1	1	2	1	1	1	1	1	2	1	1	1	1	1	1	1	1	1	1	1	1	1
24	2	1	2	1	2	3	2	1	3	3	2	4	2	2	2	3	2	3	2	3	2	2	4	2	3
23	2	1	2	3	2	2	2	2	2	3	1	2	1	1	2	3	2	2	3	2	1	1	2	1	2
23	2	1	4	4	3	3	5	3	4	3	3	4	3	3	3	3	4	4	4	3	3	3	3	4	4
18	2	1	2	4	2	3	3	3	3	4	3	4	2	2	3	2	3	2	3	4	3	4	2	2	3
22	2	1	3	2	3	3	4	3	3	3	2	3	2	3	2	3	3	3	3	3	2	2	2	2	2
23	1	1	2	4	1	1	4	3	5	5	4	4	2	3	4	3	2	1	3	1	1	2	3	2	3
19	1	1	3	3	3	4	4	4	4	2	2	3	4	4	3	3	3	3	3	3	4	4	4	4	4
20	2	1	2	2	2	1	3	3	1	3	2	1	1	1	1	2	3	2	3	2	1	1	2	2	1
24	2	1	2	2	1	2	2	1	2	3	2	1	2	1	1	1	1	1	1	1	1	1	1	1	1
21	2	1	3	2	3	2	3	3	3	3	3	2	3	2	3	3	2	3	3	2	3	3	2	3	3
19	2	1	2	2	2	3	3	2	3	2	2	3	2	2	2	2	2	2	2	2	2	2	3	2	2
22	2	1	2	1	1	2	3	2	2	1	2	3	1	2	3	3	1	1	1	1	1	1	1	1	1
24	2	1	3	3	3	3	3	3	3	3	3	3	3	3	3	2	2	2	2	2	2	2	2	2	2
18	2	1	1	2	2	1	1	2	2	1	2	4	1	4	3	4	1	2	4	2	3	3	5	3	2
22	1	1	2	2	1	2	1	1	3	3	2	4	3	3	1	1	1	1	1	1	1	1	1	1	2
19	2	1	2	1	2	1	3	2	3	2	1	4	1	2	2	2	1	1	1	2	1	1	1	1	1
24	2	1	2	1	1	3	2	1	4	2	2	2	1	1	2	2	2	2	2	2	1	1	1	1	1
23	2	1	4	4	4	4	4	4	4	4	2	2	3	1	3	1	3	3	1	3	3	3	4	5	5
18	1	1	1	2	2	1	1	1	1	1	1	1	2	2	1	2	2	1	2	2	1	1	1	1	1
22	2	1	2	2	2	2	2	2	3	3	2	2	1	1	1	1	1	3	1	2	1	1	2	1	1
21	1	1	2	2	2	3	2	2	3	2	2	3	2	3	2	2	2	3	2	3	1	1	3	1	1
24	1	1	1	2	5	2	5	1	3	1	1	1	2	1	1	1	1	2	3	1	1	1	1	1	1
20	1	1	1	1	1	1	1	1	1	1	1	1	1	1	1	2	2	2	2	2	2	2	2	2	2
43	2	1	2	1	2	2	1	2	2	1	1	1	1	1	1	1	1	1	1	1	1	1	1	1	1
25	1	1	2	2	2	2	2	2	2	2	3	3	4	2	4	2	3	2	2	3	2	2	2	3	2
39	2	1	3	4	4	4	3	4	3	3	4	3	2	4	3	4	4	4	4	4	3	3	3	3	3
65	1	1	2	2	2	2	3	2	3	3	2	3	3	2	3	2	3	2	2	2	2	2	3	2	3
25	1	1	4	4	4	4	4	3	3	4	3	4	4	4	4	3	4	3	3	4	4	4	3	4	4
44	2	1	3	1	2	2	2	2	3	3	2	2	2	2	2	2	2	2	2	2	1	1	1	1	1
62	2	1	4	4	2	4	2	2	4	4	4	4	2	1	1	2	2	2	4	2	3	4	3	4	3
18	2	1	4	4	3	4	3	4	5	4	5	4	3	5	4	5	5	5	4	4	3	5	4	5	3
34	2	1	4	3	4	3	4	4	3	3	3	4	4	3	4	4	4	4	3	3	4	3	4	4	3
50	2	1	3	3	2	2	2	2	3	3	1	1	2	1	3	2	3	2	2	2	2	1	3	1	1
25	2	1	3	3	4	3	4	4	3	4	4	2	3	3	2	3	3	4	4	4	4	3	5	5	4
30	2	1	3	3	3	3	3	3	3	3	3	3	3	3	3	3	3	3	3	3	3	3	3	3	3
23	2	1	2	1	2	3	2	2	3	1	2	1	1	1	2	2	1	1	2	1	2	1	2	2	1
27	1	1	2	3	2	2	3	2	2	2	2	2	2	2	2	2	2	2	2	3	2	2	2	2	3
50	2	1	1	1	1	1	3	2	2	3	1	1	1	1	1	1	2	2	1	1	1	1	1	1	1
65	2	1	3	2	3	3	2	2	3	3	2	1	1	1	2	2	1	2	1	1	3	3	4	2	3
44	2	1	2	3	2	4	3	3	4	3	2	2	1	1	2	2	2	2	2	2	2	1	3	2	2
46	2	1	3	3	2	2	3	1	3	2	1	1	1	1	1	1	1	1	1	1	1	1	2	1	2
42	1	1	3	4	3	2	3	3	3	3	3	3	3	3	3	2	3	2	3	3	2	2	3	3	3
60	2	1	3	3	4	3	3	3	3	3	2	4	2	2	3	3	3	3	3	3	2	2	2	2	2
41	1	1	3	3	3	3	3	3	3	3	3	3	3	3	3	3	3	3	3	3	3	3	3	3	3
18	1	1	4	2	3	3	3	4	3	4	4	3	4	4	4	3	2	3	2	3	2	2	1	1	2
20	1	1	3	3	3	3	4	3	2	3	3	2	3	3	3	3	3	2	3	3	3	3	3	3	3
29	1	1	4	4	3	3	4	4	3	3	4	3	2	4	4	4	5	4	4	3	3	4	4	4	5
46	1	1	2	3	2	3	2	2	2	3	3	1	3	3	3	2	2	3	2	3	2	2	3	4	2
46	1	1	3	3	3	3	3	3	3	3	3	3	3	3	3	3	3	3	3	3	3	3	3	3	3
58	1	1	2	1	2	2	3	2	2	2	2	2	2	2	2	1	1	1	1	1	1	1	1	1	1
25	2	1	4	4	4	4	3	4	4	4	3	4	4	4	4	4	4	4	4	4	4	4	4	4	4
40	1	1	3	4	2	4	2	3	4	4	3	3	3	4	4	3	2	2	3	2	3	4	4	3	4
30	1	1	2	1	4	1	4	3	1	2	2	1	1	1	2	1	1	2	3	2	1	1	1	1	1
53	2	1	1	2	2	1	1	1	2	2	1	1	1	1	1	1	1	1	1	2	1	1	1	2	1
48	1	1	1	1	2	2	2	2	3	3	4	3	2	2	2	2	1	1	2	1	2	1	3	1	3
25	1	1	3	3	3	4	3	4	4	4	3	3	3	2	2	4	3	2	3	3	3	3	3	3	3
37	1	1	2	2	2	2	2	2	2	2	2	2	2	2	2	2	2	2	2	2	2	2	2	1	2
50	1	1	2	2	2	2	2	2	3	2	2	2	2	2	2	1	1	1	1	1	1	1	1	1	1
39	1	1	1	3	2	1	3	2	1	2	3	3	3	3	3	3	2	1	2	1	1	1	2	1	1
56	2	1	1	1	2	2	2	1	1	2	1	1	1	1	1	1	1	2	2	1	1	1	2	1	1
22	1	1	3	3	3	3	3	3	3	3	3	3	3	3	3	4	4	4	4	3	4	3	3	3	4
48	1	1	2	2	2	2	2	2	2	2	2	2	2	2	2	3	3	2	2	2	2	2	2	2	2
43	2	1	1	2	2	1	2	1	2	3	1	3	2	1	2	3	1	2	1	3	1	2	3	2	2
59	2	1	2	2	1	1	1	1	1	1	3	1	2	1	2	1	1	1	1	1	2	1	3	1	2
32	2	1	2	2	3	3	2	2	2	2	2	3	2	2	2	2	2	2	2	1	2	2	2	2	2
53	2	1	2	2	2	3	2	1	2	2	2	2	2	1	2	2	1	2	2	2	2	1	2	1	2
48	2	1	2	1	2	1	2	1	3	3	1	1	1	1	1	1	1	2	1	1	1	2	2	2	2
25	1	1	2	2	1	2	1	3	4	3	3	4	2	3	3	3	1	2	3	2	1	1	1	1	1
45	2	1	2	1	2	1	2	1	3	2	2	4	2	2	1	1	1	1	1	2	1	1	1	1	1
44	1	1	2	2	2	2	2	2	2	2	2	2	2	2	2	1	1	1	1	1	1	1	1	1	1
59	1	1	2	2	1	1	1	2	1	2	2	2	1	2	1	2	1	2	2	1	1	2	2	2	2
29	2	1	3	3	3	3	3	3	3	3	3	3	3	3	3	3	3	3	3	3	3	3	3	3	3
26	1	1	4	4	3	3	2	3	3	4	4	3	2	3	3	4	4	5	2	3	3	3	3	4	2
61	2	1	2	3	3	4	1	3	1	2	1	1	1	1	1	1	1	1	1	1	1	1	1	1	1
54	1	1	3	3	3	3	3	3	3	3	3	3	3	3	3	3	3	3	3	3	3	3	3	3	3
24	1	1	3	2	3	3	3	4	2	3	2	3	2	2	3	2	3	3	3	3	3	2	3	2	2
57	2	1	2	3	2	3	2	2	3	2	1	1	1	1	1	1	1	1	1	1	1	1	1	1	1
61	2	1	2	1	1	2	2	1	1	2	1	1	1	1	2	1	1	1	1	1	1	1	2	1	1
35	2	1	3	3	3	3	3	3	3	2	3	3	3	3	3	2	2	2	2	2	2	2	2	2	3
33	2	1	1	2	1	1	2	1	1	2	1	3	1	1	1	2	2	2	2	2	1	1	3	1	1
50	1	1	2	2	1	2	1	2	1	2	3	1	3	2	3	2	2	2	3	2	1	2	2	1	2
34	2	1	2	2	2	3	2	2	3	2	2	2	1	1	3	2	2	2	2	2	2	2	3	2	3
46	1	1	1	2	1	3	1	1	1	3	1	1	1	1	1	1	1	1	1	1	1	1	1	1	1
40	2	1	1	3	2	2	2	2	3	3	1	3	2	2	1	4	2	2	2	2	2	2	3	2	2
61	2	1	3	4	4	3	3	3	4	4	4	3	3	3	3	3	3	3	3	3	2	2	3	3	2
34	2	1	1	2	2	2	2	2	2	2	2	2	2	1	1	2	2	2	2	2	1	2	2	2	2
27	1	1	2	3	2	3	3	4	4	4	3	2	3	4	4	2	3	3	3	4	3	4	4	5	3
43	1	1	3	3	3	3	3	3	4	4	4	3	3	3	3	3	3	3	3	3	3	3	3	3	3
49	1	1	3	2	3	3	2	2	2	3	1	2	1	1	1	2	2	2	2	3	3	2	3	2	3
60	1	1	2	2	2	1	2	2	2	3	2	3	2	3	2	3	3	2	3	2	2	2	2	1	2
20	1	1	2	2	4	3	4	3	3	2	2	5	3	4	4	3	3	2	5	4	2	3	4	2	3
30	1	1	4	5	3	4	2	3	5	5	4	5	4	4	4	2	1	1	2	2	1	1	1	1	1
32	2	1	1	1	1	1	1	1	1	1	1	1	1	1	1	1	1	1	1	1	1	1	1	1	1
40	2	1	4	4	4	3	5	3	4	4	5	4	4	4	4	4	3	3	3	3	2	2	3	2	2
49	1	1	3	3	3	3	3	3	3	3	3	3	3	3	3	3	3	3	3	3	3	3	3	3	3
51	1	1	1	3	2	2	1	2	1	3	2	3	2	2	2	1	1	1	1	1	1	1	1	1	1
28	1	1	3	1	1	1	3	3	2	3	2	2	1	3	2	3	1	1	2	2	1	2	3	1	2
21	1	1	3	3	3	3	3	3	3	3	3	3	3	3	3	3	3	3	3	3	3	3	3	3	3
27	1	1	2	2	2	1	2	2	2	3	3	4	2	2	1	4	2	3	3	2	1	2	1	1	1
24	1	1	5	1	1	2	1	4	3	4	3	3	4	4	4	2	4	3	3	3	3	3	4	4	4
40	1	1	2	2	2	3	2	2	2	3	2	3	1	2	2	2	3	2	2	2	2	2	3	2	3
47	1	1	2	2	2	2	2	2	2	2	1	1	1	1	1	2	2	2	2	2	2	1	2	1	1
46	2	1	2	3	2	2	2	4	2	4	1	3	1	1	3	2	2	2	2	2	3	2	2	2	3
57	1	1	3	2	4	2	4	2	2	4	3	2	3	1	3	2	2	1	2	1	2	3	3	1	3
53	1	1	1	2	1	1	2	1	1	1	2	1	2	2	1	1	1	1	2	2	1	1	1	1	1
30	1	1	3	2	3	2	3	3	2	3	3	3	3	2	2	2	2	2	2	2	3	3	2	3	2
61	1	1	1	1	1	1	1	1	1	1	1	1	1	1	1	1	1	1	1	1	1	1	1	1	1
55	1	1	1	2	1	1	1	3	2	1	1	1	1	1	1	1	1	1	1	1	1	1	2	1	1
83	2	1	1	1	3	2	1	2	2	3	1	1	1	1	1	2	2	2	2	2	2	1	2	1	1
64	1	1	1	2	2	3	2	2	3	2	1	3	1	1	2	2	2	1	2	1	1	1	2	1	1
31	2	1	3	2	3	2	3	3	4	2	3	3	2	3	3	2	2	1	2	1	1	1	2	2	1
56	1	1	3	4	4	3	4	3	4	4	3	1	2	1	4	2	3	3	3	3	3	4	3	4	4
54	2	1	1	1	1	1	1	1	2	2	1	1	1	1	1	1	1	1	1	1	1	1	1	1	1
60	2	1	3	1	1	1	1	1	1	3	2	1	1	2	2	2	1	1	1	2	1	2	2	1	3
52	1	1	1	2	1	2	1	1	2	2	1	2	1	1	1	2	1	2	2	2	1	2	2	1	2
46	1	1	2	2	2	2	3	3	2	2	2	2	3	3	2	3	2	3	3	2	3	4	3	2	2
56	1	1	2	2	1	2	2	2	3	3	1	1	1	1	1	2	2	2	2	2	2	1	2	1	2
56	1	1	2	2	2	2	1	2	2	2	1	2	1	1	2	2	2	2	2	2	1	1	1	1	1
32	1	1	2	2	2	2	3	2	2	2	3	1	1	1	2	1	1	1	1	1	1	1	2	1	1
56	2	1	2	2	2	2	2	2	2	2	1	1	1	1	2	1	1	1	1	1	1	1	1	1	1
62	2	1	4	4	4	4	2	4	4	4	2	3	2	2	4	2	2	3	2	2	3	3	3	3	3
57	1	1	1	2	1	2	2	1	1	3	1	1	1	1	1	1	2	1	1	1	1	1	1	1	1
45	2	1	2	1	2	2	2	2	2	2	2	2	3	3	1	5	1	4	2	3	2	1	1	3	4
55	2	1	1	1	1	1	1	1	1	1	1	1	1	1	1	1	1	1	1	1	1	1	1	1	1
36	1	1	2	2	2	2	3	2	2	2	2	3	1	1	2	2	2	2	3	2	2	2	2	1	2
30	1	1	1	3	3	2	2	2	5	3	1	1	2	1	1	2	1	1	1	1	1	1	1	1	1
53	1	1	2	2	2	2	2	1	2	2	1	2	1	2	1	1	1	1	1	1	1	1	2	1	1
30	2	1	3	2	3	2	2	2	1	3	1	1	1	1	1	1	2	2	1	1	1	1	2	1	1
30	2	1	2	2	2	2	2	2	2	2	2	2	2	2	2	2	2	2	2	2	2	2	2	2	2
53	2	1	2	3	2	2	2	2	3	2	2	3	1	1	1	3	3	2	2	2	2	2	3	2	2
45	2	1	4	3	4	3	4	3	3	4	3	2	3	3	3	2	2	2	3	3	2	2	3	2	3
48	1	1	2	2	2	2	2	2	2	3	2	1	2	1	1	3	1	2	1	3	2	3	3	2	2
59	2	1	1	2	2	1	1	1	2	3	1	1	1	1	1	1	1	1	1	1	1	1	2	1	2
23	2	1	1	1	2	2	2	1	1	2	1	1	1	1	1	1	2	1	1	1	1	1	1	1	2
43	1	1	4	3	4	4	3	4	4	4	3	3	3	3	3	3	3	3	3	3	3	3	3	3	3
42	1	1	4	4	4	3	4	2	3	4	3	3	2	1	1	3	4	3	3	4	3	3	3	3	2
47	1	1	3	3	3	3	3	3	3	3	3	3	3	3	3	3	3	3	3	3	3	3	3	3	3
51	1	1	2	2	2	1	1	2	3	2	1	1	1	1	1	2	2	2	2	2	2	2	3	1	2
36	1	1	2	2	2	2	2	2	2	2	3	2	3	2	3	2	3	3	3	3	3	3	3	2	3
39	1	1	2	1	1	1	2	1	1	2	1	2	1	1	1	2	1	1	2	1	1	1	1	1	1
23	2	1	4	4	4	3	3	4	4	3	2	2	2	2	2	4	4	3	4	4	3	4	3	3	3
30	1	1	3	4	3	3	4	4	4	3	4	3	4	4	3	3	4	4	4	3	3	2	2	2	3
63	1	1	2	1	1	1	1	1	2	1	1	2	1	1	1	1	1	1	1	1	1	1	1	1	1
64	1	1	2	2	1	3	1	2	3	3	3	2	1	3	3	2	1	1	2	2	1	1	2	1	1
38	1	1	1	1	1	1	1	1	1	2	1	1	1	1	1	1	1	1	1	1	1	1	2	1	1
47	2	1	2	1	2	2	3	3	1	3	1	4	1	3	2	2	1	1	1	1	1	1	1	1	1
36	1	1	2	2	2	2	2	2	2	2	2	3	2	3	3	1	3	1	1	1	1	1	1	2	2
65	1	1	2	2	2	2	2	2	2	2	1	3	1	1	3	2	1	1	2	1	5	1	2	1	1
61	1	1	2	3	3	2	2	2	3	3	2	1	1	1	1	2	2	2	2	2	2	1	2	2	2
24	1	1	4	4	4	3	3	3	3	4	2	4	3	3	3	3	4	3	3	4	3	4	3	3	2
44	2	1	2	2	2	2	3	2	2	2	2	2	2	2	2	2	2	2	2	2	1	1	2	1	1
55	2	1	2	2	2	3	3	2	1	3	2	4	2	2	2	3	3	3	3	3	2	2	3	2	1
51	1	1	3	3	3	3	3	4	3	4	1	2	1	1	1	2	2	2	2	2	2	2	2	2	2
34	1	1	5	2	4	2	4	5	2	5	4	4	2	4	4	3	3	2	3	2	1	1	3	1	1
31	2	1	2	2	1	2	2	2	3	2	1	1	1	1	1	1	2	1	1	2	1	1	2	1	2
36	1	1	4	3	3	4	4	3	4	3	3	4	3	4	4	4	3	3	4	3	4	4	4	3	4
43	1	1	3	4	4	5	3	4	3	3	3	4	4	3	4	4	4	3	5	4	3	3	4	2	3
44	2	1	1	1	1	1	1	1	1	1	1	1	1	1	1	1	1	1	1	1	1	1	1	1	1
39	1	1	3	3	2	4	3	3	3	4	4	3	4	3	3	2	3	2	3	4	3	2	3	3	4
45	1	1	1	1	2	1	3	2	3	2	4	3	3	3	3	2	2	2	3	3	2	1	1	1	1
22	2	1	2	2	2	2	2	2	2	2	3	3	3	3	2	2	3	3	3	3	2	3	3	3	3
54	1	1	2	1	2	1	2	4	2	2	1	2	1	1	4	2	2	1	2	2	1	1	1	1	3
47	2	1	1	1	1	1	1	1	1	1	1	3	1	1	2	2	2	2	2	2	1	1	1	1	1
31	1	1	3	2	3	2	4	3	2	3	2	3	2	3	3	3	2	3	3	3	1	1	3	1	3
34	2	1	3	3	3	3	3	3	3	3	3	3	3	3	3	3	3	3	3	3	3	3	3	3	3
27	2	1	3	2	3	2	2	2	3	2	1	1	1	1	1	2	3	2	3	2	1	1	2	1	1
44	1	1	2	2	2	2	3	2	3	3	2	2	1	1	1	2	2	2	2	2	1	2	2	1	2
47	1	1	2	1	3	3	2	1	1	2	1	1	1	1	1	2	2	2	2	2	2	2	2	2	2
43	2	1	1	1	2	2	1	1	1	2	1	1	1	1	1	1	1	1	1	1	1	1	1	1	1
22	1	1	2	2	2	3	3	3	3	3	3	1	5	3	4	1	1	1	1	1	1	1	1	1	1
57	2	1	3	2	3	3	2	3	3	4	3	4	3	3	3	2	2	1	1	3	2	3	3	3	3
30	2	1	1	2	3	1	1	2	1	1	1	1	1	1	1	3	2	2	3	3	3	3	3	3	3
26	2	1	1	1	1	1	1	1	1	1	1	1	1	1	1	1	1	1	1	1	1	1	1	1	1
29	2	1	4	5	3	2	1	3	3	2	2	3	3	3	3	4	1	2	1	2	3	5	1	3	2
22	1	1	1	1	3	2	2	3	3	2	3	3	3	3	3	3	2	2	4	3	1	1	1	1	1
25	1	1	3	3	2	2	3	4	3	2	3	2	2	2	2	4	3	4	4	3	3	4	2	2	2
42	2	1	3	2	3	4	4	3	2	3	3	2	2	2	3	3	2	2	2	3	2	2	2	2	3
53	2	1	1	2	1	1	2	2	2	2	1	1	1	1	1	2	1	1	2	3	1	1	2	1	1
40	1	1	2	2	2	2	2	2	2	2	2	2	2	2	2	2	2	2	2	2	2	2	2	2	2
23	2	1	2	3	1	1	2	1	1	2	1	1	1	1	1	1	1	1	1	1	1	1	1	1	1
35	1	1	3	3	3	3	3	3	3	3	3	3	3	3	3	3	3	3	3	3	3	3	3	3	3
54	2	1	3	2	2	3	1	1	3	3	1	1	1	1	1	1	1	1	1	1	1	1	1	1	1
31	2	1	1	1	1	1	1	1	1	1	1	1	1	1	1	1	1	1	1	1	1	1	1	1	1
54	1	1	3	2	1	3	2	3	2	3	4	4	3	4	4	3	3	2	4	3	1	1	1	1	1
64	1	1	1	1	1	1	1	1	1	3	1	1	2	3	3	2	2	2	2	2	1	1	2	1	1
53	1	1	3	2	3	4	3	4	4	2	3	3	3	3	3	3	3	3	3	3	2	2	2	2	2
27	1	1	1	2	3	2	3	2	3	2	2	3	2	2	3	3	2	3	3	3	2	1	1	2	1
54	2	1	1	2	3	2	2	2	3	3	1	2	1	1	1	2	2	2	2	3	1	1	3	1	2
62	1	1	1	2	2	2	2	2	2	1	1	1	1	1	1	2	2	1	2	1	1	1	3	1	2
53	1	1	2	3	2	3	3	2	4	3	3	3	2	1	2	1	1	1	1	1	1	1	3	1	1
23	1	1	3	3	3	3	3	3	3	3	3	3	3	3	3	3	3	3	3	3	3	3	3	3	3
48	2	1	2	1	2	2	2	2	3	2	1	1	1	1	1	2	2	1	2	2	1	1	1	1	1
35	1	1	2	2	2	2	2	2	2	2	2	3	2	2	2	1	1	1	1	1	1	1	1	1	1
56	1	1	3	2	2	2	2	2	3	2	2	2	2	2	2	3	3	2	2	2	2	2	2	1	2
56	1	1	1	3	1	2	1	2	1	3	2	2	1	1	1	2	2	2	3	2	1	1	2	1	1
51	1	1	2	2	2	2	2	2	2	2	2	2	2	2	2	1	1	1	1	1	1	1	1	1	1
33	1	1	1	2	1	2	2	1	2	2	1	1	1	1	2	2	2	2	2	2	2	2	2	2	2
18	2	1	3	3	4	3	4	3	3	4	4	3	3	2	4	3	3	4	3	3	3	3	3	4	4
45	2	1	3	2	3	2	1	2	2	4	1	4	2	3	4	2	2	1	2	2	1	1	3	1	2
38	1	1	2	2	2	2	2	2	2	2	2	2	2	2	2	2	2	2	3	2	1	1	3	1	1
49	2	1	1	1	1	1	2	1	2	2	1	1	1	1	1	1	2	1	2	1	1	2	1	1	1
54	2	1	1	2	1	1	1	1	1	1	2	2	1	2	3	1	1	2	1	1	2	1	2	2	3
48	2	1	2	1	1	2	2	1	2	2	3	2	2	1	3	2	1	1	2	2	2	2	3	2	3
50	2	1	1	1	2	2	2	2	2	3	1	3	1	1	2	1	1	2	1	1	1	1	1	1	1
43	1	1	3	1	1	1	1	1	1	2	1	1	1	1	1	2	2	2	1	2	1	1	2	1	1
35	1	1	4	4	3	3	3	2	2	3	2	3	3	3	4	3	4	3	3	2	3	3	2	1	2
25	1	1	3	3	3	4	4	3	3	2	3	3	4	2	4	3	3	4	4	2	4	3	4	2	3
50	1	1	4	2	3	4	2	2	4	4	2	2	2	1	2	2	2	2	2	2	1	2	1	1	1
47	1	1	1	1	1	1	1	1	1	1	1	1	1	1	1	2	2	2	2	2	2	2	2	2	2
29	1	1	3	3	3	3	3	3	3	3	3	3	3	3	3	2	2	2	2	2	2	2	2	2	2
41	1	1	3	3	3	3	2	4	2	2	2	2	2	3	2	3	2	3	2	1	2	2	3	2	3
28	1	1	3	3	3	3	3	3	3	3	3	3	3	3	3	3	3	3	3	3	3	3	3	3	3
29	1	1	5	3	4	3	4	4	5	4	3	4	4	3	5	5	4	4	5	3	4	4	4	3	3
25	1	1	3	3	2	3	3	2	3	2	2	3	3	3	3	2	3	3	3	3	3	3	2	2	2
53	2	1	2	2	2	2	2	2	2	2	1	2	1	1	1	2	2	2	2	2	2	2	2	2	2
64	2	1	1	1	1	1	1	1	2	2	1	1	1	1	1	1	1	1	1	2	1	1	1	1	1
32	1	1	3	3	3	2	4	4	3	2	4	4	3	3	3	2	3	3	3	3	3	3	4	3	3
32	1	1	4	4	2	4	3	3	3	4	4	3	4	3	4	3	4	3	4	4	4	3	3	4	3
25	2	1	3	4	4	3	2	3	2	3	3	3	2	3	4	4	4	3	3	2	4	3	2	3	3
27	2	1	2	2	3	2	2	2	3	4	2	3	2	2	1	2	2	2	2	1	1	1	2	1	1
27	1	1	3	3	2	2	3	3	3	3	2	2	3	2	2	2	2	3	3	3	3	3	2	2	3
47	1	1	3	3	3	3	3	3	3	3	3	3	3	3	3	3	3	3	3	3	3	3	3	3	3
46	2	1	3	1	2	3	1	1	1	3	1	1	1	1	1	1	3	1	1	1	1	1	1	1	1
64	1	1	2	2	2	1	1	1	3	3	1	2	1	1	2	2	2	1	2	2	2	1	2	2	1
58	2	1	2	2	3	2	3	2	2	3	1	1	1	1	1	2	2	3	2	2	2	2	2	2	2
41	1	1	2	2	2	2	2	2	2	2	1	1	2	1	1	1	1	1	1	1	1	1	1	1	1
48	2	1	1	3	1	2	4	1	1	3	1	1	2	1	3	1	1	2	1	1	1	1	5	2	1
47	1	1	3	2	2	2	2	2	4	3	3	3	2	2	1	2	2	1	2	2	1	1	3	1	1
24	1	1	3	2	2	1	2	2	1	2	2	1	2	1	2	2	1	2	1	1	2	1	2	3	2
51	1	1	1	1	1	1	1	1	2	1	1	1	1	1	1	2	1	1	2	1	1	1	2	1	2
53	2	1	2	2	2	2	2	3	3	3	2	4	2	2	2	1	1	1	1	1	1	1	1	1	1
36	1	1	2	2	2	2	2	2	2	3	2	2	2	2	2	3	3	3	3	3	3	3	3	3	3
34	1	1	1	2	1	1	3	2	3	2	2	3	1	1	2	1	1	1	1	2	1	2	3	2	2
18	1	1	4	4	3	4	4	4	3	3	3	4	4	4	3	4	3	4	4	3	3	4	3	4	3
35	2	1	3	3	2	2	2	2	2	3	2	2	2	2	2	2	3	3	2	2	3	3	3	2	3
48	2	1	2	2	3	2	2	2	2	2	2	2	2	2	2	2	2	2	2	2	2	2	2	2	2
27	1	1	4	5	4	3	4	4	5	3	4	4	3	3	5	4	3	3	4	5	4	4	3	5	4
32	2	1	3	2	3	2	3	3	2	3	3	3	2	2	3	3	2	3	3	2	3	3	2	3	2
37	2	1	2	2	2	2	2	2	2	2	2	2	2	2	2	3	2	3	2	2	2	2	3	2	3
26	1	1	4	3	4	4	3	1	5	2	4	5	5	2	4	4	5	1	3	2	1	4	2	2	3
26	1	1	2	1	1	1	2	1	1	2	4	4	2	4	4	2	3	4	3	2	1	2	4	1	1
33	2	1	2	2	2	2	4	2	3	2	2	3	3	1	2	3	2	1	2	2	1	1	3	1	1
33	1	1	2	3	3	3	3	2	4	3	2	4	2	2	2	2	2	2	2	2	1	1	1	1	1
25	1	1	3	2	3	2	2	3	2	2	1	2	1	1	1	2	2	2	2	2	2	2	2	2	2
18	1	1	5	2	5	5	3	3	4	5	2	3	2	3	1	3	2	1	2	3	2	1	5	3	3
34	2	1	4	4	4	4	4	4	4	4	3	5	2	2	3	3	4	3	4	3	4	3	4	3	4
32	1	1	3	3	3	3	3	3	3	3	3	3	3	3	3	3	3	3	3	3	3	3	3	3	3
48	1	1	2	2	2	2	2	2	2	2	2	2	2	2	2	2	2	2	2	2	2	2	2	1	1
51	2	1	1	1	1	1	2	1	2	1	1	1	1	1	1	1	1	2	1	2	1	2	2	1	1
54	1	1	2	3	2	2	2	2	2	2	2	3	1	2	3	2	1	2	2	1	2	2	2	1	2
50	1	1	2	3	2	3	3	3	3	3	3	2	3	3	3	3	3	3	3	2	3	3	3	3	3
35	2	1	3	2	3	2	3	3	3	3	1	2	1	3	2	4	3	4	4	3	2	2	3	3	3
55	2	1	1	1	1	1	1	1	1	1	1	1	1	1	2	1	1	1	1	1	1	1	1	1	1
23	2	1	3	3	4	3	2	2	3	1	2	3	4	3	3	3	3	3	2	3	3	2	3	3	4
23	2	1	3	2	2	2	2	2	2	3	2	3	2	2	3	3	3	3	3	3	2	2	3	1	2
26	1	1	3	3	3	3	3	3	3	3	3	3	3	3	3	3	3	3	3	3	3	3	3	3	3
59	1	1	1	3	3	3	2	2	2	3	2	4	2	3	3	1	1	1	1	2	1	1	1	1	1
35	1	1	3	3	3	3	3	3	3	3	3	3	3	3	3	3	3	3	3	3	3	3	3	3	3
26	2	1	2	2	3	3	3	3	4	3	1	3	2	2	3	3	2	2	2	2	3	2	2	2	3
26	2	1	4	4	4	4	4	4	4	4	3	4	3	3	2	4	4	4	4	4	3	4	3	4	3
65	2	1	3	3	3	3	3	2	3	4	3	3	3	3	3	2	2	2	2	2	3	2	3	2	3
27	1	1	3	3	3	3	3	3	3	3	4	4	4	3	4	3	3	3	3	3	2	2	2	2	2
54	1	1	1	1	1	2	1	1	1	2	5	5	4	5	4	2	1	2	2	2	2	2	3	2	3
45	1	1	2	2	2	3	3	3	3	2	2	3	3	3	2	2	2	3	3	3	2	3	3	3	2
35	2	1	5	4	2	4	3	4	3	3	1	3	3	5	3	3	4	2	3	4	2	3	3	5	4
33	1	1	3	2	4	3	4	5	2	2	2	2	3	3	4	2	2	3	3	4	4	3	4	4	2
60	1	1	1	1	2	2	1	1	2	3	1	3	1	1	2	1	1	1	1	1	1	1	2	1	1
32	1	1	3	3	3	3	2	3	4	3	3	3	4	3	3	3	2	3	4	3	3	3	3	3	4
57	2	1	3	3	3	3	4	3	2	4	3	2	3	2	2	3	2	3	2	2	2	2	2	2	2
46	2	1	2	2	2	2	3	2	2	2	3	3	3	3	3	2	2	2	2	2	2	2	2	2	2
38	1	1	3	2	2	2	2	2	3	2	1	2	1	1	1	2	2	1	2	2	2	1	2	1	1
27	2	1	4	2	4	3	3	3	2	3	3	3	3	3	4	2	3	3	3	2	3	2	3	2	1
61	2	1	4	3	3	3	3	4	3	4	4	3	4	3	3	3	3	2	3	2	3	3	3	3	3
25	2	1	3	2	2	3	1	1	2	3	2	2	2	2	2	1	1	1	1	2	1	1	1	1	1
22	2	1	2	2	2	1	3	2	2	2	2	2	2	2	4	1	1	1	1	2	1	1	3	1	3
29	1	1	1	1	1	1	1	1	1	1	1	1	1	1	1	2	1	2	1	2	1	1	1	1	1
25	1	1	1	1	4	2	1	2	2	2	2	3	1	2	2	2	3	2	2	2	1	1	3	1	1
62	2	1	2	3	3	3	2	2	2	3	2	2	2	2	2	2	2	2	2	2	2	2	3	1	2
26	1	1	2	4	3	3	4	3	2	3	3	3	2	2	3	2	2	3	2	2	4	3	3	4	3
51	2	1	1	1	1	1	1	1	1	1	1	1	1	1	1	1	1	1	1	1	1	1	1	1	1
34	1	1	3	3	3	3	3	3	3	3	3	3	3	3	3	3	3	3	3	3	3	3	3	3	3
24	1	1	2	3	3	4	3	2	3	4	5	3	4	4	3	4	2	3	3	3	3	2	3	2	4
24	1	1	3	2	3	3	4	3	3	3	4	4	5	5	5	3	2	1	4	2	3	4	3	4	3
54	1	1	3	2	3	3	3	3	3	3	3	3	3	3	3	2	2	3	3	3	3	3	3	3	3
34	2	1	3	3	3	4	4	5	4	4	1	3	2	1	3	3	4	4	3	3	3	3	3	2	3
34	1	1	2	2	2	2	2	2	2	3	2	2	1	3	3	3	3	4	3	2	1	2	3	1	1
59	1	1	2	2	2	2	3	3	2	2	3	4	3	3	2	2	2	2	2	2	2	2	3	2	2
54	1	1	1	1	1	1	2	1	1	1	1	2	1	1	1	1	1	1	1	1	1	1	1	1	1
40	1	1	2	2	3	3	2	2	3	2	1	3	1	1	2	1	2	1	2	1	1	1	1	1	1
49	2	1	2	2	2	2	2	2	2	2	1	1	1	1	1	1	1	1	1	1	1	1	1	1	2
42	1	1	3	3	3	3	3	3	3	3	2	1	2	2	3	2	2	2	2	2	1	1	3	1	2
25	1	1	4	4	4	3	5	4	3	4	3	4	3	4	4	4	3	4	4	3	4	4	5	4	3
34	1	1	3	4	3	4	4	3	2	3	3	3	2	3	4	4	2	3	1	2	5	3	4	4	3
54	1	1	2	2	2	2	2	2	2	3	1	1	1	1	1	1	2	1	2	1	1	1	1	1	2
49	1	1	3	2	3	3	2	2	3	3	2	2	2	2	2	2	2	2	2	2	2	2	2	2	2
56	2	1	3	3	3	3	3	3	3	3	3	3	3	3	3	4	4	4	4	4	4	4	4	4	4
33	1	1	3	4	4	2	2	2	2	3	3	3	3	3	4	2	2	2	2	3	2	2	3	3	3
43	1	1	3	2	3	2	3	2	4	3	1	3	1	1	3	2	2	1	2	2	3	3	3	2	3
28	2	1	1	1	1	1	1	1	1	1	1	1	1	1	1	2	2	2	1	1	1	1	1	1	1
20	1	1	4	4	4	3	1	4	3	3	4	2	3	3	4	2	4	3	2	2	3	2	2	2	3
59	1	1	1	1	1	1	1	1	1	2	1	1	1	1	1	1	1	1	1	2	1	1	2	1	2
23	2	1	3	3	3	3	3	3	3	3	3	4	3	4	4	3	3	3	3	3	3	3	3	4	4
24	1	1	4	4	3	4	3	4	3	4	4	4	4	4	4	3	3	3	3	3	4	3	3	3	4
47	1	1	1	1	1	1	1	1	1	1	1	1	1	1	1	1	1	1	1	1	1	1	1	1	1
24	1	1	1	1	1	1	1	1	1	1	1	1	1	1	1	1	1	1	1	1	1	1	1	1	1
21	1	1	3	3	3	3	4	4	3	3	2	2	3	2	2	3	3	3	3	3	2	2	3	2	2
21	2	1	3	2	2	1	2	2	2	2	2	3	2	3	3	2	2	2	2	2	2	2	2	2	2
33	2	1	4	4	3	3	4	4	3	3	2	3	3	2	2	3	4	4	4	4	2	3	3	3	4
22	2	1	3	1	1	3	2	1	1	3	1	1	2	1	1	2	2	1	2	1	1	1	1	1	1
31	2	1	5	2	5	4	3	4	3	5	4	4	3	3	5	3	3	3	2	2	4	3	2	4	3
37	1	1	2	3	2	3	2	4	3	2	2	1	2	3	2	4	2	4	3	4	3	3	3	2	4
55	1	1	1	1	1	1	1	1	1	1	1	1	1	1	1	1	1	1	1	1	1	1	1	1	1
64	1	1	3	3	2	2	2	2	2	2	2	2	2	3	2	2	2	3	2	2	1	2	2	2	1
44	2	1	3	2	2	1	2	1	3	1	3	2	2	2	3	3	3	3	3	3	2	2	2	2	1
30	2	1	2	2	2	2	2	2	2	2	2	2	2	2	2	2	2	2	2	2	2	2	2	2	2
45	2	1	1	1	3	1	3	1	1	1	3	4	2	4	2	1	1	1	1	1	1	1	1	1	1
60	1	1	2	2	2	2	2	1	2	2	1	1	2	1	3	2	2	2	2	2	1	2	3	1	2
47	2	1	2	2	2	2	2	2	2	2	2	2	2	2	2	2	2	2	2	2	2	2	2	2	2
57	1	1	2	1	2	1	1	2	1	2	1	1	1	1	1	1	1	1	1	2	1	2	1	1	1
53	1	1	1	1	1	1	1	1	1	1	1	1	1	1	1	1	1	1	1	1	1	1	1	1	1
25	1	1	3	3	3	3	3	2	3	3	2	2	2	2	2	3	3	3	3	3	2	2	2	2	3
41	1	1	3	2	3	1	2	2	2	3	2	2	3	2	3	2	1	2	2	2	1	2	2	2	2
61	1	1	3	3	3	3	3	3	3	3	2	2	2	2	2	2	2	2	2	2	2	2	2	2	2
26	1	1	3	4	4	4	4	4	4	3	3	3	3	3	3	4	4	4	4	4	4	4	4	4	4
59	1	1	2	2	2	2	2	2	2	2	1	1	1	1	2	2	2	2	2	2	1	1	1	1	1
62	1	1	2	3	2	2	2	2	4	2	2	3	1	2	3	2	2	3	2	2	1	2	2	1	1
65	1	1	2	2	2	2	1	2	2	3	1	2	1	1	2	2	1	1	2	2	1	2	2	1	1
40	1	1	1	1	2	1	2	3	1	2	3	2	2	1	1	2	1	2	2	2	1	1	3	1	1
33	1	1	3	3	1	2	5	4	2	4	4	2	1	3	5	1	3	1	2	2	4	3	2	4	3
60	1	1	1	1	1	1	2	1	1	3	1	1	1	1	2	1	1	1	1	2	1	1	2	1	1
34	2	1	1	1	3	1	1	1	1	1	1	1	1	1	1	1	1	1	1	1	1	1	1	1	1
61	1	1	1	2	1	1	1	1	1	1	1	5	1	1	3	1	1	1	2	1	1	1	1	1	1
41	2	1	4	4	4	4	2	2	3	4	2	3	2	3	3	2	4	4	4	3	3	3	2	3	3
50	1	1	2	2	2	2	2	2	2	2	1	3	1	2	2	3	3	2	3	2	3	3	4	2	3
50	1	1	1	1	1	1	1	1	1	1	1	1	1	1	1	1	1	3	1	2	1	1	3	1	1
58	2	1	2	2	2	2	2	2	2	2	2	2	2	2	2	2	2	2	2	2	2	2	2	2	2
63	2	1	2	1	2	1	1	1	2	3	1	1	1	1	1	2	1	1	1	1	1	1	1	1	1
33	1	1	2	2	2	2	2	2	4	2	2	2	2	1	1	2	2	2	2	3	2	1	3	1	1
42	2	1	1	1	1	1	1	1	1	1	1	1	1	1	1	1	1	1	1	1	1	1	1	1	1
55	1	1	3	2	3	2	3	3	3	3	2	2	2	1	2	1	1	1	1	2	2	2	2	2	2
41	1	1	3	3	3	4	4	3	4	4	4	4	4	3	3	4	4	4	3	3	3	3	3	3	3
54	1	1	1	1	1	1	1	1	1	1	1	1	1	1	1	1	1	1	1	1	1	1	1	1	1
42	1	1	3	3	3	3	3	3	3	3	3	3	3	3	3	3	3	3	3	3	3	3	3	3	3
24	2	1	4	4	2	4	5	3	4	4	4	4	3	3	3	3	3	4	3	3	1	1	3	1	1
34	2	1	3	3	3	3	3	3	3	3	3	3	3	3	3	2	2	2	2	2	2	2	2	2	2
56	2	1	3	3	3	3	3	3	3	3	3	3	2	1	1	2	3	3	3	3	3	2	2	2	3
63	2	1	1	1	1	1	2	1	2	1	1	1	2	1	1	2	1	1	1	1	1	1	2	1	1
63	2	1	1	1	2	3	1	1	2	3	1	1	1	1	2	1	1	1	1	2	1	1	2	1	1
39	2	1	2	2	2	2	2	2	2	2	2	2	2	2	2	2	2	2	2	2	2	2	2	2	2
42	1	1	3	3	3	3	3	3	3	3	3	3	3	3	3	3	3	3	3	3	3	3	3	3	3
45	2	1	1	1	1	1	1	1	1	1	1	1	1	1	1	1	1	1	1	1	1	1	1	1	1
54	1	1	3	3	3	3	3	3	3	3	3	4	3	3	2	2	2	2	2	3	1	1	2	1	1
36	1	1	3	3	3	3	3	3	3	3	3	3	3	3	3	3	2	3	3	2	3	3	2	2	2
59	2	1	1	1	2	2	1	1	2	3	1	1	1	1	1	2	2	1	1	2	1	1	2	1	2
46	2	1	2	3	3	3	2	3	3	4	1	1	1	2	1	2	2	2	2	2	2	2	2	2	2
43	2	1	1	2	1	1	1	1	2	1	2	3	2	2	2	2	2	2	2	3	2	2	2	2	2
40	1	1	1	1	1	1	1	1	1	1	1	1	1	1	1	1	1	1	1	1	1	1	1	1	1
51	1	1	3	3	3	2	2	2	2	2	2	4	3	2	2	3	2	1	3	2	2	2	2	3	1
52	2	1	2	3	2	2	3	2	3	3	4	3	3	2	2	1	1	2	2	1	1	1	2	1	1
51	1	1	3	3	3	3	3	3	3	3	3	3	3	3	3	3	3	3	3	3	3	3	3	3	3
44	2	1	1	1	1	1	1	1	1	1	1	1	1	1	1	1	1	1	1	1	1	1	1	1	1
45	1	1	1	1	1	2	1	1	1	1	1	2	1	1	1	1	1	1	1	1	1	1	1	1	1
50	2	1	4	3	3	4	1	2	3	2	3	4	2	3	3	3	2	3	4	3	3	3	1	1	2
51	2	1	3	3	3	2	3	3	3	3	3	3	2	3	3	3	3	3	3	3	3	3	3	3	3
30	2	1	3	3	3	3	3	3	3	3	3	3	3	3	3	3	3	3	3	3	3	3	3	3	3
51	2	1	1	2	2	1	3	2	1	3	1	1	1	1	1	2	2	2	2	2	1	1	1	1	1
34	1	1	2	2	3	3	3	2	3	2	2	4	1	3	3	1	1	1	1	1	1	1	1	1	1
47	1	1	3	3	3	3	3	3	3	3	3	3	3	3	3	3	3	3	3	3	3	3	3	3	3
30	2	1	5	3	5	5	5	3	5	5	5	5	5	4	4	1	2	1	1	2	1	3	3	2	1
36	2	1	3	3	3	3	3	3	3	4	4	4	3	4	4	3	3	3	3	3	3	3	3	3	3
25	1	1	2	4	2	2	4	2	2	2	2	2	2	4	2	5	5	3	4	3	4	1	1	1	4
39	2	1	2	1	2	1	1	1	1	1	1	1	1	1	1	1	1	2	1	1	1	1	1	1	1
51	2	1	3	3	3	3	2	3	3	4	4	3	3	3	3	2	2	2	2	2	2	2	2	2	2
38	2	1	3	3	3	3	3	3	3	3	3	3	3	3	3	3	3	3	3	3	2	3	3	3	3
46	2	1	3	2	1	3	1	2	2	2	1	1	1	1	1	2	1	1	1	2	2	2	2	1	2
27	2	1	2	2	2	2	2	1	2	2	2	2	2	2	2	2	2	2	2	2	2	2	2	2	2
26	1	1	4	2	3	3	3	2	4	3	3	4	3	4	3	2	3	2	2	3	3	4	4	1	3
27	1	1	3	2	2	3	4	2	4	4	2	2	2	2	3	2	2	2	2	2	3	3	3	3	3
42	2	1	3	3	3	3	3	3	3	3	3	3	3	3	3	3	3	3	3	3	3	3	3	3	3
34	2	1	3	3	3	3	2	3	3	3	2	3	3	2	3	2	3	3	3	2	2	3	3	3	2
44	2	1	3	3	3	3	3	3	3	3	3	3	3	3	3	3	3	3	3	3	3	3	3	3	3
38	1	1	3	3	3	3	3	3	3	3	3	3	3	3	3	3	2	2	3	2	3	3	3	2	3
48	2	1	1	3	3	3	3	3	3	3	3	3	3	3	3	3	3	3	3	3	3	3	3	3	3
52	1	1	3	1	2	3	2	2	3	3	1	3	2	2	3	2	1	2	2	2	1	1	2	1	1
31	1	1	2	3	2	2	3	4	4	3	3	3	2	2	3	3	2	2	2	3	3	3	3	3	2
38	2	1	4	4	4	4	4	2	4	4	4	4	4	4	5	3	2	3	3	3	4	4	4	4	4
40	1	1	1	2	2	2	2	1	1	2	2	3	2	2	2	2	2	2	2	2	1	1	2	1	1
39	1	1	3	3	3	3	3	3	3	3	2	2	2	2	2	3	2	3	4	4	3	3	3	3	3
25	2	1	3	3	3	3	3	3	3	3	3	3	3	3	3	3	3	3	3	3	3	3	3	3	3
31	2	1	3	3	3	2	2	1	3	3	1	3	2	1	2	2	2	2	2	2	2	2	2	2	2
23	2	1	3	3	3	3	3	3	3	3	3	3	3	3	3	3	3	3	3	3	3	3	3	3	3
32	1	1	3	3	3	3	2	2	2	2	2	2	3	3	2	3	3	3	3	3	3	3	3	3	3
24	2	1	3	3	2	3	3	3	4	2	1	4	1	1	1	3	3	2	3	2	3	1	4	2	3
23	2	1	2	2	3	2	3	3	3	1	3	3	3	2	3	3	1	3	2	3	2	3	3	2	3
24	2	1	2	4	4	2	2	4	3	1	3	2	4	4	2	1	2	4	5	4	3	2	5	4	3
24	2	1	3	3	4	3	4	3	3	4	3	3	3	4	3	3	3	4	4	3	4	3	4	3	3
19	1	1	2	4	4	4	3	3	3	3	4	3	3	3	3	4	4	4	3	4	5	4	5	3	3
23	1	1	2	3	2	3	2	3	3	2	2	3	3	3	2	3	2	3	3	2	2	3	2	3	2
18	2	1	4	3	2	3	4	2	3	4	3	3	2	2	2	4	2	2	3	3	2	3	2	4	2
24	2	1	3	2	1	2	2	2	3	3	2	1	2	1	1	3	3	3	3	3	1	1	1	1	1
23	1	1	3	3	3	3	3	3	3	3	3	3	3	3	3	3	3	3	3	3	3	3	3	3	3
23	2	1	3	4	2	4	1	2	1	2	3	2	2	1	1	3	2	4	2	3	2	2	1	2	3
24	1	1	2	2	5	3	3	5	4	5	2	3	1	3	2	2	2	1	3	2	1	1	3	1	1
18	2	1	3	2	3	3	2	3	3	2	2	3	3	3	4	3	3	2	4	3	3	3	2	3	3
20	2	1	2	2	3	3	3	2	3	3	3	4	3	3	3	2	2	1	2	2	2	2	4	2	2
23	2	1	5	3	4	4	2	4	5	5	2	4	2	3	3	4	4	3	4	4	4	4	4	4	2
22	2	1	3	3	4	4	3	3	3	2	4	3	3	3	3	3	3	2	3	3	3	3	3	3	3
22	1	1	1	1	1	1	2	1	3	2	1	1	1	1	1	2	1	1	1	2	1	2	2	1	2
23	1	1	2	2	4	3	3	3	2	4	2	3	3	3	3	3	3	3	3	3	1	3	4	2	1
23	2	1	3	5	1	4	4	3	2	3	1	4	3	2	5	1	2	3	3	4	5	3	2	4	3
21	2	1	3	2	2	2	3	2	2	2	2	3	2	2	2	2	2	2	2	3	1	1	3	1	1
24	1	1	3	2	3	3	2	3	3	4	3	3	3	3	2	2	3	3	3	2	3	3	4	3	2
20	2	1	3	2	2	3	2	2	4	2	2	3	2	3	2	2	2	2	3	1	1	1	3	1	1
21	2	1	3	2	4	2	4	3	2	3	2	2	2	2	3	3	2	3	2	3	1	1	2	1	1
23	2	1	2	2	2	2	3	2	2	2	2	2	2	2	2	2	2	2	2	2	2	2	2	2	2
22	2	1	3	3	3	3	3	3	3	3	3	3	3	3	3	3	3	3	3	3	3	3	3	3	3
19	1	1	4	3	2	4	4	3	4	2	4	4	4	3	4	4	2	3	2	5	3	2	4	3	4
23	1	1	4	4	5	4	5	5	3	4	4	4	3	4	5	4	4	5	4	5	4	3	3	3	4
20	1	1	2	2	3	3	3	3	4	2	1	2	3	2	3	2	2	3	3	2	2	3	3	3	4
28	1	1	3	4	4	3	3	2	3	3	3	4	4	3	3	4	3	2	3	4	4	4	3	3	2
53	1	1	2	2	1	1	2	1	1	3	2	1	2	2	2	1	2	2	2	1	2	2	3	1	3
55	2	1	2	1	1	2	2	2	2	2	1	1	1	2	1	2	2	3	2	3	1	1	2	1	2
59	1	1	2	2	2	2	2	2	2	3	3	3	2	3	1	2	1	1	2	2	1	1	3	1	2
35	2	1	4	3	4	3	3	3	3	3	3	3	3	3	3	3	4	3	3	3	3	3	3	4	3
33	2	1	2	2	2	2	3	2	2	3	1	2	1	1	1	1	1	1	1	1	1	1	2	1	2
36	1	1	3	4	3	3	3	4	4	3	3	2	4	3	3	4	4	2	4	3	4	3	3	3	2
29	1	1	3	2	3	3	2	3	3	4	4	4	2	3	3	2	4	1	3	3	3	2	4	3	1
34	1	1	4	4	4	4	4	4	4	4	3	2	4	3	3	4	4	4	4	4	4	5	4	4	4
47	1	1	2	3	3	2	2	3	3	3	1	2	1	2	1	2	2	2	2	3	2	2	2	2	2
24	1	1	2	3	2	2	3	3	3	3	3	3	2	3	2	2	2	3	3	2	2	2	3	2	2
36	2	1	3	3	3	3	3	3	3	3	3	3	3	3	3	3	3	3	3	3	3	3	3	3	3
38	2	1	2	3	4	1	2	2	3	1	2	3	3	4	2	4	1	3	2	1	3	3	3	4	2
65	2	1	1	1	1	1	1	1	1	1	1	1	1	1	1	1	1	1	1	1	1	1	2	1	2
61	2	1	2	3	3	2	3	3	3	3	1	1	1	1	1	1	1	1	1	1	2	1	2	1	2
38	2	1	2	2	2	1	2	2	1	2	2	2	4	3	2	2	2	2	1	1	2	3	1	1	2
52	1	1	2	2	3	3	3	2	4	5	2	4	3	2	5	2	2	2	2	2	2	2	4	2	2
61	1	1	2	3	2	2	1	2	2	1	1	1	1	1	1	1	1	1	2	2	2	1	3	1	3
54	1	1	4	3	4	2	4	3	4	4	3	1	4	4	4	3	4	3	3	4	2	3	3	3	2
53	2	1	3	2	4	3	3	2	3	3	2	3	2	2	3	2	2	2	2	2	1	2	2	1	2
59	1	1	4	2	3	3	3	4	3	3	3	2	3	3	3	3	4	3	3	2	3	3	3	4	2
46	2	1	3	3	4	3	3	4	3	4	2	2	2	2	2	3	3	3	3	3	2	1	3	1	3
61	1	1	1	1	1	1	1	1	2	2	1	1	1	1	1	1	1	1	1	1	1	1	1	1	1
63	1	1	3	2	3	3	3	3	2	2	3	1	1	2	1	2	3	3	2	2	1	1	1	1	1
19	1	1	2	2	2	2	2	2	2	2	2	2	2	2	2	3	3	3	3	3	3	3	3	3	3
34	1	1	3	3	4	2	3	3	2	2	4	3	3	2	2	2	3	3	3	3	2	2	3	2	3
34	1	1	3	1	2	2	1	1	2	3	2	3	2	2	2	2	2	2	2	1	2	1	1	2	1
40	2	1	2	1	2	3	2	1	3	2	1	1	1	1	1	1	1	1	1	1	1	1	2	2	1
37	2	1	2	1	2	1	1	2	3	2	1	1	1	1	1	2	2	2	3	1	2	1	1	2	1
52	1	1	2	3	2	3	2	2	2	2	3	3	2	3	4	2	3	2	2	2	3	3	3	3	4
37	2	1	2	1	2	2	2	4	2	3	1	3	1	2	1	1	1	1	1	1	1	1	1	1	1
35	2	1	3	4	4	4	4	4	4	4	5	5	5	4	4	2	2	1	2	2	1	1	4	1	1
24	2	1	4	4	4	4	4	4	4	4	4	4	4	4	4	4	4	4	4	4	4	4	4	4	4
55	1	1	1	1	1	1	2	2	2	2	2	1	1	1	2	2	2	2	1	2	1	2	2	2	2
25	2	1	3	2	3	2	3	2	2	3	3	3	3	4	3	3	3	2	3	3	3	3	3	3	2
55	2	1	3	3	3	3	4	2	3	4	2	2	1	2	1	1	2	3	2	2	2	1	2	1	2
35	1	1	4	4	3	4	4	4	4	4	3	4	3	3	4	3	3	3	3	3	3	3	3	3	3
57	2	1	3	2	3	3	3	3	2	3	2	3	3	2	2	2	2	3	2	2	2	2	4	2	2
25	2	1	4	4	4	4	4	4	4	4	4	4	4	4	4	4	4	4	4	4	4	4	4	4	4
25	2	1	4	4	4	4	4	4	4	4	3	4	3	4	4	4	4	4	4	4	4	4	4	4	3
60	2	1	3	3	4	3	3	3	3	4	2	2	2	1	2	2	2	2	1	2	1	1	1	1	1
25	1	1	4	4	3	4	4	3	4	4	4	4	4	4	4	4	4	4	4	3	2	4	4	4	4
60	1	1	1	2	1	2	2	1	1	3	1	2	1	2	1	2	1	1	2	2	1	1	1	1	1
47	2	1	3	3	1	3	3	2	2	2	3	3	2	3	3	2	2	3	2	3	3	3	2	2	2
64	1	1	2	3	2	2	3	2	3	2	2	3	2	2	3	3	2	3	3	3	2	2	2	2	3
47	2	1	4	3	4	2	3	3	4	5	1	2	3	1	3	2	3	2	2	2	1	1	1	1	1
33	2	1	3	3	3	4	4	3	3	3	3	3	3	2	2	3	2	4	3	3	3	2	3	3	3
41	2	1	2	2	2	2	2	2	2	2	2	2	2	2	2	2	2	2	2	2	2	2	2	2	2
28	1	1	5	5	5	4	5	5	5	5	5	5	5	5	5	5	5	5	5	4	5	4	5	5	5
59	1	1	1	1	2	1	2	1	2	2	2	2	2	2	3	2	1	1	2	2	1	1	2	1	2
35	2	1	3	2	1	3	1	1	3	3	1	4	1	2	3	3	3	3	3	3	2	3	3	2	3
61	1	1	1	2	2	3	2	1	1	2	2	2	3	1	4	1	1	1	2	2	1	1	3	2	3
40	2	1	4	4	4	4	4	4	4	4	4	4	4	4	3	3	2	3	3	2	2	2	2	2	2
47	1	1	3	2	2	2	2	3	2	3	2	1	3	2	2	2	2	2	2	2	3	2	3	3	3
44	2	1	3	2	3	3	2	1	3	3	1	2	1	1	1	2	2	3	2	2	2	2	3	2	2
49	2	1	4	4	4	4	4	3	4	4	4	4	3	4	3	3	3	3	3	3	3	3	3	3	3
40	2	1	3	3	3	3	3	3	3	3	2	2	2	1	2	2	3	2	2	2	2	2	2	2	2
25	2	1	4	4	4	4	4	4	4	4	3	4	3	4	3	4	4	4	4	4	4	4	4	4	4
63	1	1	4	5	4	4	4	3	4	5	4	4	5	4	5	3	4	3	4	3	2	2	4	3	3
24	1	1	2	2	2	2	2	2	2	2	2	3	2	2	2	3	2	3	3	2	3	3	3	2	3
56	1	1	3	3	3	3	3	3	3	3	3	3	3	3	3	3	3	3	3	3	3	3	3	3	3
35	2	1	1	1	1	3	5	1	1	3	4	5	2	1	1	1	1	1	1	2	1	1	1	1	1
50	1	1	2	1	1	1	1	1	1	2	1	3	1	1	2	1	1	1	1	1	1	1	1	1	1
40	1	1	3	3	4	3	4	3	4	3	2	2	2	2	2	3	3	4	4	3	3	2	3	2	2
60	2	1	2	3	3	3	2	2	2	3	3	1	3	2	3	2	2	1	2	1	3	2	3	3	3
30	2	1	3	3	3	3	4	3	3	3	3	3	2	3	3	2	2	3	3	3	2	3	3	3	2
61	1	1	1	1	1	1	1	1	1	1	1	1	1	1	1	1	1	1	1	1	1	1	1	1	1
19	2	1	2	2	1	2	3	2	4	3	1	3	2	3	2	2	1	2	2	2	2	2	3	3	2
29	1	1	2	2	2	1	2	2	3	2	2	2	2	1	1	2	2	2	2	2	2	2	2	2	2
40	2	1	2	1	3	2	2	1	2	3	1	1	1	1	1	1	2	1	1	1	1	1	2	1	1
57	1	1	1	1	1	1	1	1	1	1	1	1	1	1	1	1	1	1	1	1	1	1	1	1	1
52	1	1	1	1	1	2	1	1	1	3	1	2	1	1	1	2	2	2	2	2	1	1	3	1	1
52	2	1	2	1	1	2	1	2	2	2	1	1	1	1	1	2	2	2	2	2	2	1	2	1	2
53	2	1	4	2	4	5	3	3	5	5	1	1	1	1	1	2	2	1	1	1	2	1	3	2	2
25	2	1	2	2	2	1	3	2	3	2	2	2	2	2	2	2	2	3	2	2	1	1	1	1	1
31	1	1	4	4	4	4	4	5	5	4	3	3	3	4	3	4	5	4	4	5	5	4	4	3	4
56	1	1	3	2	2	3	3	3	2	4	3	2	3	3	3	2	3	2	2	2	2	2	3	2	2
49	1	1	3	2	3	3	3	2	3	3	3	3	4	3	1	2	2	2	2	2	2	1	3	2	2
45	2	1	2	1	2	1	2	2	2	2	1	2	1	1	1	2	2	2	3	3	2	1	2	1	2
59	1	1	2	1	2	1	1	1	1	2	1	1	1	1	2	1	1	2	1	1	1	1	2	1	1
54	1	1	2	2	2	2	2	2	2	2	3	3	2	2	3	2	2	1	2	2	2	2	3	2	2
32	1	1	3	4	4	4	4	3	3	4	4	3	4	3	4	4	3	3	4	3	3	4	3	4	3
38	2	1	2	3	2	2	1	4	3	1	2	4	3	2	3	3	2	2	1	2	3	2	2	2	4
24	1	1	5	5	3	4	4	5	4	4	5	4	4	5	4	5	5	5	4	5	4	5	3	5	4
55	1	1	2	3	3	4	4	3	1	4	3	3	3	3	3	3	3	2	3	2	1	1	1	1	1
52	1	1	1	1	1	1	1	1	1	1	1	3	1	1	1	1	2	1	2	1	1	2	1	1	1
57	1	1	3	3	4	3	3	3	3	3	3	3	2	3	3	3	3	3	3	3	2	3	3	2	3
50	2	1	1	1	1	1	2	1	1	1	1	1	1	1	1	1	1	2	1	1	1	1	1	1	1
58	2	1	2	1	1	2	2	2	1	2	3	4	3	3	3	1	2	3	1	2	1	1	2	1	2
30	1	1	3	4	5	4	4	5	5	5	3	4	4	4	5	4	4	4	4	4	4	4	4	4	4
39	2	1	3	2	2	1	3	2	3	3	2	4	2	2	3	2	2	1	2	2	1	1	1	1	1
27	1	1	4	4	3	4	5	2	4	3	3	3	5	4	4	3	4	3	4	3	4	3	4	3	2
51	2	1	4	3	4	5	4	2	4	5	5	5	5	4	5	2	2	2	2	2	1	1	2	1	2
33	2	1	4	4	4	3	5	2	2	4	4	3	2	2	4	2	2	2	2	1	5	3	5	4	5
31	1	1	3	3	3	3	4	4	4	3	4	3	4	3	3	3	3	2	2	3	2	2	3	3	2
32	1	1	3	3	2	2	1	2	2	2	2	2	2	2	2	3	2	2	2	2	1	2	1	1	2
44	1	1	1	1	1	1	1	1	1	1	1	1	1	1	1	1	1	1	1	2	1	1	1	1	1
64	2	1	1	1	1	2	1	1	1	2	1	1	1	1	1	1	1	1	1	1	1	1	1	1	1
54	1	1	2	2	1	1	2	1	1	2	1	2	1	1	1	2	1	1	2	1	1	1	1	1	1
22	2	1	4	4	5	4	3	3	3	5	1	5	1	1	2	1	1	1	1	3	4	3	4	4	4
32	1	1	1	2	2	1	1	1	4	1	1	1	1	1	1	2	2	3	4	3	1	1	1	1	1
55	1	1	4	4	4	4	4	4	4	4	4	4	4	4	4	4	3	3	3	3	4	4	3	4	4
21	1	1	3	4	3	2	3	3	3	4	3	3	4	4	2	3	3	3	2	4	2	3	4	3	4
40	1	1	1	1	1	1	2	1	1	1	3	4	3	3	3	2	3	2	3	1	1	1	1	1	1
43	2	1	1	1	1	1	1	1	1	1	1	2	1	1	3	1	1	1	1	1	1	1	1	1	1
35	1	1	4	2	4	3	2	5	2	4	5	3	4	3	3	3	5	4	4	2	3	4	4	5	4
48	2	1	2	3	2	2	2	2	2	2	2	3	2	2	2	1	1	1	1	1	1	2	2	1	2
47	1	1	2	1	1	1	2	1	1	1	1	1	1	1	1	1	1	1	1	1	2	2	2	1	3
45	1	1	1	1	1	1	1	1	1	1	1	1	1	1	1	2	2	3	3	2	1	1	2	1	1
40	2	1	3	3	2	2	3	3	3	3	3	2	3	2	2	2	3	2	3	3	2	2	2	2	2
41	1	1	2	1	2	2	1	1	2	3	2	3	2	2	1	2	1	2	1	2	1	1	2	1	1
23	2	1	2	1	3	2	1	2	2	2	1	1	1	1	1	2	1	1	1	1	1	1	1	1	1
43	2	1	3	3	2	2	2	2	2	3	1	2	2	1	1	3	3	2	3	2	2	2	2	2	2
56	2	1	2	1	1	1	2	1	1	2	1	1	2	1	1	1	1	1	1	2	1	1	1	1	1
50	2	1	2	2	2	3	2	1	2	3	2	3	1	1	1	2	2	2	2	2	1	2	2	1	2
25	2	1	4	4	4	4	4	4	4	4	4	4	4	4	4	4	4	4	4	4	4	4	4	4	4
27	1	1	5	5	4	4	5	5	4	4	5	4	4	5	4	4	5	4	5	5	4	5	5	4	5
51	1	1	3	3	3	3	4	3	3	2	3	4	2	3	3	2	3	3	3	3	3	3	4	3	2
65	1	1	2	2	2	3	3	2	2	2	2	2	2	2	2	2	2	2	2	2	2	2	2	2	2
54	2	1	1	1	1	1	1	1	1	1	1	1	1	1	1	1	1	1	1	1	1	1	1	1	1
29	1	1	3	2	4	2	3	2	3	3	2	3	4	3	3	2	4	3	3	3	3	3	2	3	4
46	2	1	2	2	2	2	2	2	2	2	1	1	1	1	1	1	1	1	1	1	1	1	1	1	1
46	1	1	1	1	1	1	2	1	1	1	2	1	2	2	3	1	1	1	1	2	1	1	3	1	1
45	1	1	4	4	5	3	4	5	3	4	3	2	4	3	3	3	3	4	3	3	2	3	4	3	3
34	1	1	2	4	1	4	3	3	2	5	2	3	3	2	3	5	3	1	2	4	3	5	4	2	3
39	1	1	2	2	2	2	2	2	2	2	1	2	1	1	1	1	1	1	1	1	2	1	2	2	2
45	1	1	3	3	2	2	2	3	2	3	4	4	3	4	3	2	2	3	2	3	1	2	3	1	2
45	1	1	2	3	3	3	2	2	3	3	1	1	1	1	1	1	1	1	1	1	1	1	1	1	1
29	1	1	4	3	3	4	4	4	4	4	3	3	4	4	4	3	4	3	4	3	3	3	4	4	4
57	1	1	3	3	3	3	1	2	3	3	2	2	2	2	2	2	2	2	2	2	2	2	3	2	2
41	1	1	3	2	1	2	3	2	3	3	3	2	3	2	3	2	2	2	2	2	3	2	4	1	3
39	2	1	3	3	3	3	3	3	3	3	3	3	3	3	3	3	3	3	3	3	3	3	3	3	3
37	1	1	3	3	3	2	3	3	3	2	4	3	2	3	3	3	2	3	2	4	3	2	4	3	3
55	1	1	2	2	2	2	2	2	2	2	2	3	2	2	2	2	2	2	2	2	2	2	2	2	2
35	1	1	5	4	3	4	3	3	5	5	4	4	3	4	5	2	1	2	2	1	2	4	4	3	3
41	1	1	3	4	3	4	3	3	4	4	4	4	4	3	3	2	1	2	2	1	1	3	2	2	2
64	1	1	2	2	2	2	1	2	2	3	2	2	1	2	2	1	1	3	2	2	2	2	2	2	2
52	2	1	4	2	4	3	4	2	3	4	3	4	3	3	3	2	3	2	2	2	1	1	2	1	1
37	1	1	3	3	2	4	3	4	3	3	3	5	2	2	2	3	4	4	4	4	3	4	3	2	3
25	2	1	5	5	5	5	5	5	5	5	5	5	5	5	5	5	5	5	5	5	5	5	5	5	5
29	2	1	5	2	4	4	4	2	4	4	2	1	3	2	4	2	3	3	2	2	2	2	2	2	3
53	2	1	3	3	3	2	2	3	3	3	2	3	2	2	2	3	3	3	3	3	3	3	3	3	3
50	2	1	2	2	2	2	2	2	2	3	2	2	2	2	2	2	2	2	2	2	2	2	2	2	2
52	2	1	2	1	3	3	3	2	2	3	1	2	3	1	2	1	1	1	1	1	1	1	3	1	1
45	2	1	3	2	3	3	3	2	3	3	1	1	1	1	1	1	2	1	1	1	1	1	3	1	1
44	1	1	2	2	3	3	3	3	2	4	2	2	2	3	2	2	2	2	2	2	2	3	3	3	2
21	1	1	2	2	2	2	2	2	2	2	2	2	2	2	2	2	2	2	2	2	2	2	2	2	2
45	2	1	3	2	1	2	2	1	3	3	1	1	1	1	1	2	2	2	2	2	2	2	2	2	2
40	1	1	2	2	3	4	2	3	4	3	4	3	3	3	3	3	3	4	4	3	4	2	2	2	5
42	1	1	3	2	3	2	2	2	2	3	2	4	2	2	2	2	2	2	2	2	1	1	1	1	1
21	2	1	3	3	3	3	3	3	3	3	3	3	3	3	3	3	3	3	3	3	3	3	3	3	3
39	1	1	4	2	4	3	3	2	3	4	4	3	3	3	2	2	2	2	2	2	2	2	2	2	2
49	1	1	3	2	2	2	1	2	2	2	2	4	1	2	2	2	2	2	2	2	1	1	3	2	3
55	1	1	1	2	1	1	1	2	1	3	1	2	1	2	1	2	2	2	2	2	2	2	1	2	1
49	1	1	2	2	3	2	2	3	3	4	2	2	2	2	2	2	2	2	2	2	3	3	3	3	4
48	2	1	1	1	1	1	1	1	1	1	1	1	1	1	1	1	1	1	1	1	1	1	1	1	1
26	2	1	4	5	5	4	3	4	4	4	4	2	1	3	5	2	3	4	5	5	3	2	4	3	2
43	1	1	1	1	1	1	1	1	1	1	1	1	1	1	1	1	1	1	1	1	1	1	1	1	1
41	2	1	3	2	5	2	3	2	2	3	2	2	2	2	2	2	2	3	2	2	2	2	3	2	2
49	1	1	2	2	1	2	3	3	1	1	2	1	1	1	1	3	3	4	3	2	1	1	3	1	2
50	2	1	3	3	3	2	2	2	3	3	2	2	1	1	2	3	3	3	2	2	3	2	3	1	4
42	1	1	2	2	3	2	2	2	3	3	3	4	2	2	2	2	2	2	2	3	2	2	2	2	2
47	1	1	1	1	1	1	1	1	1	3	1	2	1	1	1	1	1	1	1	1	1	1	1	1	1
37	2	1	4	3	4	2	3	2	4	3	4	3	3	3	4	3	3	4	3	4	4	3	2	3	4
64	1	1	2	1	2	2	1	2	4	2	2	1	1	2	2	2	2	1	1	2	1	2	1	1	2
51	2	1	2	1	1	1	1	1	2	2	1	1	1	1	1	1	1	1	1	1	1	1	1	1	1
25	1	1	2	2	2	2	2	1	3	2	1	2	2	2	1	2	2	2	2	2	2	2	2	2	2
38	2	1	2	2	2	2	3	2	3	3	3	3	3	3	3	2	2	2	2	2	2	2	3	1	2
45	2	1	4	5	4	4	5	1	4	5	1	4	1	1	1	1	3	3	2	2	1	1	1	1	1
27	1	1	2	2	2	2	2	2	2	3	2	2	1	2	2	2	2	2	2	2	2	2	2	2	2
36	2	1	4	3	4	4	4	4	4	4	1	4	1	1	3	4	4	3	4	2	4	4	4	4	4
41	2	1	2	5	2	3	4	3	3	3	2	3	3	1	3	3	3	3	2	2	2	4	4	3	3
34	1	1	3	3	4	3	3	4	4	3	4	3	4	4	3	4	4	4	3	4	3	4	4	3	3
21	2	1	4	4	4	2	2	2	2	4	4	4	3	3	4	2	2	4	2	3	1	1	4	1	1
26	1	1	2	2	2	2	2	2	2	2	2	2	2	2	2	2	2	2	2	2	2	2	2	2	2
27	2	1	3	4	3	4	3	3	4	3	4	3	4	4	3	4	3	4	4	3	3	4	4	4	3
27	2	1	4	3	3	5	3	4	5	4	2	4	3	3	4	3	4	4	5	5	1	4	1	2	3
26	1	1	3	3	3	3	3	3	3	3	3	3	3	3	3	3	3	3	3	3	3	3	3	3	3
21	1	1	3	3	3	3	3	3	2	2	2	3	3	3	4	4	3	3	3	4	3	3	3	4	2
25	2	1	4	4	4	4	4	4	4	4	4	4	4	4	4	4	4	4	4	4	4	3	4	4	4
52	1	1	2	1	2	1	1	2	1	2	2	1	2	1	2	2	2	1	2	1	2	2	3	3	3
42	1	1	3	3	3	3	4	3	4	3	2	4	2	2	3	3	2	4	3	2	3	2	3	2	2
25	2	1	4	4	4	4	3	4	4	4	4	4	4	4	4	4	4	4	4	1	4	4	4	4	4
60	2	1	2	2	3	2	2	1	3	3	1	2	1	1	1	1	2	1	2	1	2	1	2	2	2
59	1	1	3	2	3	3	3	2	3	3	2	2	3	2	3	2	2	2	3	3	2	2	2	1	2
37	1	1	2	2	2	2	2	3	2	2	3	3	3	3	3	2	3	2	3	2	2	2	2	2	2
48	2	1	3	1	2	2	2	2	1	3	2	1	1	1	1	1	1	2	1	3	1	2	3	1	1
37	1	1	3	3	3	3	3	3	3	3	3	3	3	3	3	5	5	5	2	5	4	4	3	5	4
39	1	1	3	2	2	2	2	1	3	2	1	2	1	1	1	1	2	1	2	1	1	1	1	1	1
25	1	1	3	3	3	3	3	3	3	3	3	3	3	3	3	3	3	3	3	3	3	3	3	3	3
40	2	1	3	3	3	4	3	3	3	4	2	2	2	1	2	2	2	2	2	2	2	2	3	2	2
42	1	1	3	4	4	3	3	4	5	3	3	4	4	5	3	3	3	4	4	4	3	4	4	4	3
45	1	1	1	1	1	1	1	1	1	2	1	3	1	1	1	2	1	2	5	2	1	1	2	1	1
39	1	1	3	3	3	3	3	4	4	4	3	4	3	3	2	3	2	4	3	3	3	4	4	3	3
52	1	1	2	2	4	3	3	2	3	3	2	4	2	3	4	2	2	2	2	2	2	1	3	3	2
25	2	1	3	3	4	2	3	2	3	4	3	2	2	3	2	3	3	2	3	3	3	2	2	2	3
55	1	1	3	3	4	3	3	2	2	4	3	3	3	2	4	4	3	4	4	3	4	4	4	4	4
50	1	1	4	3	4	4	4	4	4	4	3	4	4	4	3	4	3	4	3	4	3	3	3	3	3
44	1	1	3	2	2	4	2	2	3	3	2	2	2	2	2	2	2	2	2	2	2	3	3	2	3
32	1	1	3	3	2	3	4	3	3	3	3	4	4	4	3	5	2	3	4	5	3	4	2	3	4
29	1	1	4	4	3	3	3	4	2	4	2	4	3	3	3	2	4	4	4	3	3	3	2	3	4
46	2	1	1	1	1	1	2	1	2	1	1	1	1	1	1	2	2	1	1	2	2	1	2	1	2
48	2	1	4	3	3	4	3	4	4	3	4	3	4	3	3	3	3	3	3	3	3	3	3	3	3
34	2	1	4	4	4	4	3	3	4	4	2	3	3	2	2	2	2	3	3	2	2	2	4	3	2
62	2	1	3	2	3	3	2	3	2	3	2	2	2	2	2	2	2	2	2	2	2	2	2	2	2
26	1	1	2	2	3	3	4	3	3	2	4	2	3	2	3	2	3	3	3	2	3	2	3	2	2
22	2	1	2	3	2	1	3	1	1	2	3	4	3	4	2	2	3	3	2	2	3	3	3	4	4
31	1	1	3	3	3	2	2	2	4	3	4	3	2	3	3	3	3	3	2	4	2	2	3	3	4
24	2	1	2	2	3	2	2	2	2	2	3	3	3	3	3	2	3	3	3	2	4	3	3	4	3
49	1	1	4	4	4	4	4	4	4	4	4	4	4	4	4	4	4	3	4	2	1	3	3	3	1
49	2	1	4	4	3	3	4	3	3	4	4	4	4	4	5	4	4	4	4	4	4	4	4	4	4
45	1	1	3	3	1	1	3	3	3	2	3	2	3	3	3	3	2	2	3	2	1	1	3	1	1
43	1	1	1	2	1	1	1	1	1	2	1	2	1	1	1	1	1	1	2	1	2	2	3	1	2
45	2	1	1	1	3	2	2	1	2	3	1	1	1	1	1	2	2	2	2	3	1	2	2	2	2
30	1	1	1	1	2	1	1	1	3	1	1	4	1	1	1	1	1	1	2	1	1	1	3	1	1
42	1	1	1	1	1	1	1	2	3	1	1	1	1	1	1	1	1	1	2	1	1	1	2	1	1
18	2	1	1	1	1	1	1	1	1	1	1	1	1	1	1	2	2	1	2	1	1	1	1	1	1
21	2	1	3	3	3	3	3	4	3	3	3	3	2	3	3	2	3	2	2	3	3	2	3	2	3
19	1	1	1	2	3	3	2	1	3	3	1	2	1	3	2	1	1	2	2	2	1	1	3	1	2
22	1	1	2	4	4	2	2	2	3	3	1	3	1	3	4	1	1	1	1	2	2	2	3	3	2
30	2	1	3	2	2	3	4	3	3	3	2	4	3	3	2	4	3	2	4	3	2	2	2	2	2
23	2	1	3	3	4	3	3	3	3	3	3	3	2	2	2	3	3	3	2	3	2	2	2	2	2
22	1	1	4	4	4	4	4	4	4	4	4	4	4	4	4	4	4	4	4	4	4	4	4	4	4
31	2	1	3	3	3	3	4	2	5	4	2	4	4	3	3	4	3	4	3	2	3	4	3	3	2
31	2	1	1	1	1	2	1	2	2	1	1	1	1	1	1	2	2	1	1	2	1	1	1	1	1
21	2	1	1	1	1	1	1	1	1	1	1	1	1	1	1	1	1	1	1	1	1	1	1	1	1
24	2	1	4	2	2	2	2	3	3	4	1	4	1	1	2	3	3	4	2	3	1	1	1	1	1
24	2	1	2	3	2	2	2	1	3	3	2	2	1	1	1	2	2	1	2	2	2	1	3	1	1
20	2	1	4	4	4	4	4	4	4	4	4	4	4	4	4	3	3	3	3	3	3	3	3	3	3
22	2	1	1	1	1	1	1	2	1	1	1	1	1	1	1	1	1	1	1	1	1	1	1	1	1
24	2	1	3	2	3	3	2	2	4	3	2	4	2	2	2	3	3	3	3	2	1	2	2	1	1
61	1	1	4	2	3	4	3	3	4	4	2	2	1	1	2	3	3	3	3	3	2	3	4	2	3
58	1	1	1	1	2	1	2	4	2	2	1	2	1	1	1	1	1	2	1	1	1	1	1	1	1
45	1	1	2	1	2	1	1	1	1	2	1	2	1	1	2	2	2	1	2	2	1	1	2	1	2
48	2	1	1	1	1	1	1	1	1	1	1	1	1	1	1	1	1	1	1	1	1	1	1	1	1
60	1	1	3	1	2	2	2	3	2	3	1	2	1	2	2	1	1	1	1	2	1	2	1	3	1
58	1	1	1	1	3	3	1	1	2	2	2	1	1	1	1	1	1	1	1	1	2	1	2	1	2
33	1	1	5	5	5	5	5	5	5	5	5	5	5	5	5	5	5	5	5	5	5	5	5	5	5
31	1	1	2	2	2	2	2	2	3	2	2	2	2	2	3	4	3	3	3	2	2	2	2	1	2
58	1	1	2	4	4	2	1	2	1	3	1	1	1	1	1	1	1	1	2	3	2	1	3	3	3
59	2	1	1	1	1	1	1	1	1	1	1	1	1	1	1	1	1	1	1	1	1	1	1	1	1
21	2	1	3	3	3	2	2	2	2	2	3	3	3	4	3	2	2	1	3	3	2	2	2	2	2
51	2	1	2	2	2	1	2	1	2	3	2	1	1	1	1	1	2	2	2	2	1	1	1	1	1
56	2	1	2	1	1	1	2	2	1	1	1	1	1	1	1	1	1	1	1	1	1	1	1	1	1
36	2	1	1	1	3	1	3	3	1	1	1	1	1	1	1	2	2	3	2	3	1	1	1	1	1
57	1	1	3	2	2	1	1	2	3	2	1	2	1	2	2	2	2	2	2	2	1	1	2	1	1
61	1	1	3	3	3	4	5	1	1	1	3	4	4	3	3	1	1	1	1	1	3	3	4	3	3
59	1	1	1	1	1	2	2	1	3	2	1	1	1	1	2	1	1	2	2	2	1	1	2	1	1
47	1	1	2	2	2	2	2	2	2	3	2	2	2	2	2	2	2	2	2	2	2	2	2	2	2
27	1	1	4	4	4	4	4	4	4	4	4	4	4	4	4	4	3	3	3	4	3	4	3	4	3
40	1	1	4	3	4	4	3	3	2	2	4	4	4	4	4	3	2	3	3	2	4	4	4	4	4
64	1	1	3	2	3	3	3	2	2	3	2	2	1	2	2	2	2	1	2	1	1	1	1	1	1
46	2	1	2	3	1	2	1	1	3	3	1	1	1	1	1	1	1	1	1	1	1	1	2	1	1
64	2	1	2	2	2	2	1	2	2	2	1	1	1	1	1	2	1	1	2	2	1	1	1	1	1
51	1	1	3	3	3	3	3	3	3	4	3	2	3	2	3	2	2	2	2	2	2	2	3	2	2
60	2	1	2	2	2	2	2	2	2	2	2	2	2	1	2	2	2	2	2	2	3	3	3	2	3
37	2	1	2	1	2	1	1	1	3	2	1	1	1	1	1	2	2	2	2	2	1	1	2	1	1
44	1	1	1	1	1	1	1	1	1	1	1	1	1	1	1	1	1	1	1	1	1	1	1	1	1
59	2	1	1	1	1	1	1	1	1	1	1	1	1	1	2	2	2	2	2	2	2	3	2	1	3
40	1	1	3	3	2	3	3	3	3	3	2	2	3	2	3	3	3	2	3	3	3	2	4	3	3
39	2	1	4	4	4	4	4	4	4	4	4	4	4	4	4	4	4	4	4	3	4	4	4	4	4
52	1	1	2	2	2	2	2	2	2	2	2	2	2	2	2	2	2	2	2	2	3	3	2	2	3
48	1	1	2	3	3	2	3	3	2	2	2	3	2	3	3	2	3	3	2	3	2	2	3	3	2
41	2	1	2	2	2	3	2	2	3	3	1	1	1	1	1	2	2	1	2	2	1	1	3	1	1
38	2	1	4	2	3	2	3	3	2	3	2	3	2	3	3	2	3	3	2	3	2	2	2	2	2
48	2	1	1	1	2	1	1	1	1	2	1	1	1	1	2	1	1	1	1	1	1	1	2	2	2
21	2	1	2	2	2	2	3	2	2	2	2	2	2	2	2	2	2	2	2	2	2	2	2	2	2
40	1	1	2	2	2	2	2	2	2	2	2	2	2	2	2	2	2	2	2	2	2	2	2	2	2
48	1	1	4	5	3	4	3	4	5	4	4	5	3	4	3	5	4	5	4	4	4	4	3	3	4
50	1	1	3	2	3	1	2	1	3	3	2	2	2	2	2	2	2	2	2	2	3	2	3	2	3
45	1	1	2	2	1	2	2	2	1	1	2	2	1	1	1	1	1	1	2	1	1	1	2	1	1
34	2	1	1	1	1	1	1	1	1	1	1	1	1	1	1	1	1	1	1	2	1	1	1	1	2
46	2	1	4	3	4	4	3	2	2	5	1	4	2	2	3	2	2	3	2	2	1	1	2	1	1
53	1	1	1	1	2	2	2	1	3	3	1	1	1	1	1	1	2	1	1	2	2	1	3	1	1
24	1	1	3	3	2	3	1	2	2	3	2	2	2	1	2	2	2	2	2	3	2	1	1	1	1
32	2	1	2	2	2	2	2	2	2	2	2	2	1	2	2	2	2	2	2	2	2	2	3	2	2
53	1	1	1	2	1	2	1	1	1	1	1	1	1	1	1	1	1	1	1	1	1	1	1	1	1
50	1	1	3	2	2	2	3	2	1	3	2	2	2	1	2	3	3	2	3	2	2	1	2	2	3
31	2	1	3	3	3	3	3	3	3	3	3	3	3	3	3	3	3	3	3	3	3	3	3	3	3
45	2	1	2	2	2	2	3	2	2	3	1	3	3	2	3	2	1	2	2	2	1	1	2	1	1
54	2	1	3	3	3	3	2	2	3	4	2	2	1	1	1	2	2	1	2	1	2	2	2	2	2
24	2	1	4	4	4	4	4	4	4	4	4	4	4	4	4	1	1	1	1	1	1	1	1	1	1
54	2	1	2	2	2	2	2	2	2	2	2	2	2	2	2	2	2	2	2	3	2	2	3	2	2
37	1	1	4	3	3	4	4	3	4	4	4	4	4	4	3	4	4	4	3	4	3	4	3	3	3
32	1	1	1	1	1	1	1	1	1	1	1	1	1	1	1	1	1	1	1	3	1	1	1	1	1
51	2	1	1	1	1	1	1	1	1	1	1	1	1	1	1	1	1	1	1	1	1	1	1	1	1
54	1	1	2	2	2	2	3	2	3	2	2	2	2	2	1	1	1	1	2	2	1	1	2	1	1
37	2	1	3	3	2	3	4	2	2	3	3	3	3	3	2	3	3	3	3	3	2	2	2	2	2
41	1	1	4	4	4	4	4	4	4	4	4	4	4	4	4	4	4	4	4	4	4	4	4	4	4
38	1	1	2	2	3	2	1	1	1	2	1	1	1	1	3	2	2	3	2	2	1	1	2	1	2
27	1	1	2	2	1	1	2	2	3	1	1	2	1	2	1	1	1	2	2	3	1	1	1	1	2
26	1	1	3	3	3	3	3	3	3	3	3	3	3	3	3	3	3	3	3	3	3	3	3	3	3
38	1	1	4	4	4	4	4	4	4	4	4	4	4	4	4	4	4	4	4	4	4	4	4	4	4
48	2	1	1	1	2	1	2	1	3	3	1	1	1	1	1	2	2	2	1	2	2	1	2	1	2
41	2	1	5	5	5	1	5	3	1	5	5	4	5	5	5	4	4	4	4	4	2	2	3	2	2
35	2	1	2	2	2	3	3	2	2	2	2	2	2	2	2	2	2	2	2	2	2	2	2	2	2
24	2	1	3	2	2	3	4	2	2	3	5	3	1	2	3	3	2	2	2	3	1	2	4	1	1
34	2	1	4	3	4	5	5	4	4	5	5	5	5	5	5	4	4	4	4	2	4	3	4	5	4
23	1	1	2	2	5	3	4	2	3	3	2	3	4	5	2	1	3	2	2	4	2	3	4	3	2
54	2	1	2	2	2	2	3	2	3	2	1	1	2	1	1	2	2	2	2	2	2	2	2	2	2
40	1	1	3	3	4	3	4	3	4	3	2	2	2	2	2	4	4	4	4	4	4	4	4	3	4
43	1	1	2	3	4	4	4	3	4	4	3	2	3	3	3	2	2	2	2	2	1	1	3	1	2
21	1	1	3	2	4	4	4	2	3	4	4	2	3	4	4	4	3	3	2	3	4	4	3	3	2
30	2	1	3	3	4	3	4	3	4	4	2	1	3	1	3	3	3	2	2	3	2	3	3	3	3
29	2	1	3	3	3	3	3	3	3	3	3	3	3	3	3	3	3	3	3	3	3	3	3	3	3
32	1	1	4	4	4	3	3	3	4	3	3	4	3	3	3	3	3	4	3	4	3	3	4	4	3
33	2	1	2	2	2	2	2	2	2	2	2	3	2	2	2	3	3	3	3	3	2	2	2	2	2
20	2	1	3	4	3	2	4	4	3	4	4	3	4	4	4	3	4	4	4	4	3	3	3	3	4
22	1	1	2	5	3	5	5	2	2	3	2	4	1	1	1	2	3	3	3	3	3	2	3	3	2
23	2	1	3	3	3	3	3	3	3	3	3	4	2	3	3	3	3	4	3	3	1	1	3	3	2
21	1	1	2	3	3	3	2	3	3	3	3	3	3	2	3	3	4	2	4	3	4	3	4	3	3
21	1	1	4	2	2	2	2	2	4	3	1	2	1	2	3	3	2	4	2	3	2	2	1	1	3
21	2	1	1	2	2	2	3	2	3	2	3	1	1	1	1	2	2	2	2	2	2	2	2	2	2
22	2	1	3	3	3	3	3	3	3	3	2	2	3	1	1	2	2	2	2	2	1	1	1	1	3
20	1	1	3	3	3	3	3	3	3	3	3	3	3	3	3	3	3	3	3	3	3	3	3	3	3
23	1	1	2	1	1	1	2	1	2	1	3	2	2	3	1	2	1	1	1	1	1	1	3	1	1
22	1	1	2	2	2	2	3	2	3	3	2	3	1	2	2	2	2	2	2	2	1	1	1	1	1
18	2	1	2	2	3	3	3	2	2	3	2	3	2	2	2	2	2	1	2	3	1	2	2	1	1
20	2	1	2	2	4	3	3	5	3	4	3	3	3	3	3	3	2	2	2	2	2	2	3	2	2
19	2	1	3	3	3	2	3	3	3	3	1	1	2	1	3	2	2	1	2	2	1	1	1	1	1
21	1	1	3	3	3	3	2	4	3	2	3	4	4	3	2	2	3	4	3	3	3	2	3	3	4
24	1	1	4	3	3	4	2	4	4	3	3	2	2	3	3	3	2	2	2	3	2	3	3	2	2
22	1	1	3	3	2	2	4	2	3	4	3	3	3	2	3	3	4	4	2	4	3	4	3	2	4
20	1	1	2	2	2	4	2	1	2	1	4	4	4	4	4	1	2	1	1	2	1	1	1	1	1
52	2	1	1	1	1	1	1	1	1	1	1	1	1	1	1	3	3	3	3	3	3	3	3	3	3
54	2	1	1	1	2	2	1	1	1	2	1	4	1	1	2	1	2	2	2	2	1	1	2	1	1
53	1	1	1	2	1	1	3	1	3	1	2	2	1	2	2	2	3	2	3	2	1	1	2	1	1
52	2	1	2	2	2	2	2	2	2	3	2	2	2	2	2	2	2	2	2	2	2	2	2	2	2
44	1	1	2	2	2	2	2	2	2	2	2	2	2	2	2	2	2	2	2	2	2	2	2	2	2
37	2	1	2	1	1	1	2	1	1	1	1	2	1	2	1	1	1	1	1	1	1	1	2	2	2
27	1	1	4	5	2	2	3	2	5	4	2	3	4	3	3	3	4	4	5	5	2	5	3	3	3
28	1	1	4	5	5	5	5	5	5	5	5	4	4	5	5	5	5	5	4	4	5	5	5	5	5
65	1	1	2	1	1	2	1	1	1	2	1	3	1	2	2	1	2	2	1	2	2	1	2	1	2
26	2	1	4	4	4	4	4	4	4	4	3	1	3	3	2	1	2	2	2	2	1	1	1	1	1
33	2	1	2	2	2	2	2	2	2	2	2	2	2	2	2	2	2	2	2	2	2	2	2	2	2
34	2	1	3	4	3	4	2	5	5	3	1	3	2	2	5	4	3	5	4	5	5	2	1	3	3
23	2	1	3	2	3	2	3	2	2	5	1	1	2	2	1	2	2	1	2	2	2	3	2	3	2
50	1	1	2	2	3	1	1	1	1	2	1	4	1	1	1	1	1	1	1	1	1	1	1	1	1
30	1	1	3	4	3	4	4	3	5	4	3	4	3	2	3	3	5	2	3	4	2	3	4	3	4
23	1	1	3	2	2	2	3	3	3	3	2	2	1	2	3	2	2	2	2	2	2	2	2	2	2
56	1	1	3	3	2	3	2	1	1	4	1	1	1	1	3	1	1	2	1	2	2	2	2	2	2
42	1	1	3	3	3	3	3	3	3	3	2	2	2	2	2	2	2	2	2	2	2	2	2	2	2
44	2	1	3	3	3	2	3	2	4	4	3	1	2	3	3	4	3	3	4	2	1	1	2	2	1
46	1	1	1	1	1	1	1	1	1	1	1	1	1	1	1	1	1	1	1	1	1	1	1	1	1
34	1	1	4	4	5	4	4	4	5	5	5	4	5	4	5	5	4	5	4	5	5	4	4	5	4
43	2	1	1	1	1	1	3	2	1	1	1	1	1	1	1	1	1	1	1	1	1	1	1	1	1
37	2	1	2	2	2	3	3	3	4	3	4	5	4	5	3	3	4	5	4	4	4	5	4	5	3
47	2	1	5	3	4	4	3	3	4	5	2	3	3	1	2	3	3	3	4	3	1	1	2	2	2
28	1	1	2	2	2	2	2	2	2	2	2	2	2	2	2	2	3	2	2	2	2	2	2	3	2
48	1	1	3	1	2	2	2	2	2	3	1	2	1	1	1	2	2	2	2	2	1	1	1	1	1
46	1	1	2	2	2	2	2	2	2	2	2	3	2	2	2	1	1	1	1	1	1	1	1	1	1
52	1	1	1	1	1	1	1	1	1	1	1	1	1	1	2	1	1	1	1	1	1	1	1	1	1
20	1	1	2	1	1	2	1	1	3	2	1	1	1	1	1	1	1	1	1	1	1	1	1	1	1
53	2	1	1	1	1	1	1	1	1	1	1	1	1	1	1	1	1	1	1	1	1	1	1	1	1
45	1	1	2	2	2	2	2	2	2	2	2	3	2	1	3	2	2	2	3	2	2	2	3	2	3
53	2	1	3	3	4	4	3	3	4	4	1	5	1	5	3	1	1	3	3	1	1	1	1	1	1
38	2	1	1	3	1	3	1	2	2	5	1	4	1	1	1	3	2	2	2	2	1	1	1	1	1
64	2	1	2	3	2	3	2	2	4	4	1	3	3	2	2	1	1	1	1	2	1	1	1	1	3
52	1	1	5	3	5	1	5	5	3	5	5	5	5	1	5	3	3	1	3	3	5	3	3	3	5
41	1	1	1	1	1	1	1	1	1	1	1	1	1	1	1	1	1	1	1	1	1	1	1	1	1
37	2	1	4	4	5	5	5	4	5	4	5	4	5	4	3	3	2	3	3	3	2	2	4	2	2
53	1	1	3	3	3	3	3	3	3	3	3	4	3	3	3	1	2	1	2	2	2	3	3	2	2
37	1	1	5	5	5	5	5	5	5	5	5	5	5	5	5	5	5	5	5	5	5	5	5	5	5
33	2	1	3	3	3	3	2	3	3	3	3	3	3	3	3	1	3	3	3	3	2	1	3	4	2
35	1	1	2	2	1	1	2	2	1	2	1	2	1	1	1	2	2	1	2	2	1	1	1	1	1
59	2	1	2	1	1	2	3	1	1	4	4	1	1	1	1	1	3	1	1	2	1	1	2	1	1
44	1	1	1	2	4	2	1	1	3	2	1	2	1	2	1	1	1	1	1	1	1	1	3	1	3
37	1	1	3	3	3	3	3	3	3	3	3	3	3	3	3	3	3	3	3	3	3	3	3	3	3
43	2	1	4	3	4	4	2	2	3	4	3	3	3	3	2	2	2	1	2	1	3	3	3	3	3
19	1	1	2	2	1	1	1	2	3	3	2	3	2	2	2	2	1	2	1	2	2	3	2	1	3
46	1	1	3	2	2	3	3	2	3	2	2	2	2	2	2	2	2	2	2	2	1	1	2	1	1
55	2	1	2	1	2	2	1	2	3	3	1	1	1	1	1	1	1	1	1	1	1	1	1	1	1
24	2	1	3	3	3	1	2	1	3	3	1	1	1	1	1	2	2	3	3	2	1	2	2	2	2
52	2	1	3	2	4	2	3	2	4	3	2	2	2	3	1	3	2	2	3	2	1	1	1	1	2
28	1	1	3	4	3	3	3	3	4	4	3	3	4	4	3	4	3	4	3	4	3	3	3	3	3
42	1	1	5	3	4	5	4	4	5	4	4	5	4	3	4	4	5	5	5	4	4	4	3	5	5
42	2	1	2	2	2	2	3	2	3	2	2	2	1	1	2	2	2	2	2	2	2	2	2	2	2
57	2	1	2	2	2	3	1	1	2	3	1	1	1	1	1	2	2	2	2	2	2	1	2	2	2
52	1	1	1	1	1	1	1	1	1	1	1	1	1	1	1	3	4	3	4	3	1	1	1	1	1
57	1	1	5	5	5	5	5	5	5	5	5	5	5	5	5	5	5	5	5	5	5	5	5	5	5
23	1	1	5	5	5	5	5	5	5	5	5	5	5	5	5	5	5	5	5	5	5	5	5	5	5
60	2	1	2	3	3	1	1	3	3	3	3	3	3	3	3	3	3	3	3	3	3	3	3	3	3
48	1	1	3	2	1	3	4	1	2	3	2	1	3	2	2	3	3	3	3	3	3	3	3	3	3
40	2	1	1	1	2	1	3	2	1	2	1	2	1	1	1	1	1	2	1	2	1	1	2	1	1
21	1	1	1	1	1	1	1	1	1	1	1	1	1	1	1	1	1	1	1	1	1	1	1	1	1
22	1	1	1	1	1	1	1	1	1	1	2	2	2	2	2	2	2	3	2	2	3	2	3	2	2
39	1	1	2	2	4	2	4	4	2	5	1	2	1	2	2	2	2	1	2	2	2	2	3	3	2
36	2	1	3	2	4	2	3	2	3	3	2	2	2	2	2	2	2	2	2	2	2	2	2	2	2
54	2	1	2	3	3	3	3	2	3	4	3	4	3	3	3	2	2	2	2	2	2	2	3	2	3
22	1	1	3	4	4	4	4	4	3	4	3	3	4	1	3	3	3	3	3	3	3	3	3	3	3
40	1	1	3	4	3	4	5	4	2	3	5	3	2	4	3	4	3	2	3	3	4	3	4	3	2
45	2	1	2	1	1	1	1	1	1	2	1	1	1	1	1	2	1	1	2	2	1	2	1	1	1
62	1	1	2	1	1	2	1	2	1	2	5	2	1	1	1	2	2	2	1	2	1	2	3	2	1
63	1	1	3	2	1	3	1	2	3	4	1	1	1	1	2	2	3	3	2	3	1	3	4	1	2
47	2	1	3	2	2	2	3	2	2	3	2	2	1	2	3	2	2	2	2	2	2	2	2	2	2
63	2	1	1	1	1	1	1	1	1	1	1	1	1	1	1	1	1	1	1	1	1	1	1	1	3
62	1	1	3	2	3	1	2	2	3	3	1	1	1	1	3	2	2	3	2	2	2	1	2	1	3
42	1	1	3	2	3	2	2	2	4	3	2	2	2	1	2	3	3	1	3	2	2	4	3	2	3
49	2	1	3	2	3	3	1	1	2	2	3	4	2	3	3	2	2	2	2	1	3	2	3	2	2
60	1	1	4	3	3	2	3	3	3	4	1	4	3	2	2	3	3	3	3	3	1	2	2	2	2
51	1	1	4	4	4	4	4	4	4	4	4	4	4	4	4	4	4	4	4	4	4	4	4	4	4
42	1	1	4	5	5	4	4	3	4	4	3	2	3	4	3	4	3	4	1	2	2	4	4	3	3
53	1	1	5	5	5	3	5	4	4	4	5	1	5	5	4	3	2	3	1	2	4	5	5	4	5
49	1	1	3	1	4	2	4	2	2	4	1	1	1	1	1	2	2	1	2	2	1	1	1	1	1
52	1	1	4	4	4	4	4	4	4	4	4	4	4	4	4	4	4	4	4	4	3	4	4	4	4
38	1	1	4	3	5	4	3	2	4	3	3	4	4	5	3	4	4	3	3	5	5	4	3	3	4
44	1	1	3	2	4	4	3	2	3	4	2	3	2	2	2	2	2	2	2	2	1	1	1	1	1
49	2	1	4	4	4	3	3	4	4	4	4	3	4	3	4	2	2	2	2	2	2	2	2	3	4
53	2	1	5	3	3	4	3	2	4	5	2	5	3	3	3	2	4	2	3	1	1	1	2	2	1
42	1	1	1	1	1	1	1	1	1	1	1	1	1	1	1	1	1	1	1	1	1	1	1	1	1
33	1	1	3	3	3	3	2	3	3	4	2	1	2	2	3	2	2	2	3	1	1	1	1	1	1
45	2	1	3	2	5	5	2	2	2	4	3	4	1	1	1	1	1	3	1	1	1	1	1	1	1
32	1	1	4	4	4	4	4	4	4	4	4	4	4	4	4	4	4	4	4	4	4	4	4	4	4
30	2	1	3	2	3	3	3	2	4	4	2	2	2	2	2	2	2	2	2	2	2	2	2	2	2
38	1	1	5	5	5	5	5	5	5	5	5	5	5	5	5	5	5	5	5	5	5	5	5	5	5
23	2	1	3	2	3	2	3	1	3	3	2	1	2	1	1	2	2	1	2	2	2	1	3	2	2
22	1	1	4	4	2	3	2	3	4	3	4	3	2	4	3	3	4	4	2	5	3	5	3	2	4
18	2	1	3	5	5	5	4	4	4	4	5	5	4	5	5	5	5	5	5	5	4	4	4	4	5
22	2	1	4	4	4	4	4	4	4	4	1	2	4	4	4	1	4	1	1	2	1	1	1	1	1
20	1	1	4	3	3	3	3	2	3	2	2	3	3	3	3	3	3	3	4	2	2	3	3	3	3
35	1	2	5	5	5	3	5	5	4	5	5	5	5	5	5	4	3	3	4	2	2	2	2	2	1
36	2	2	2	2	3	2	2	2	2	2	2	2	1	1	1	4	4	4	4	4	1	1	3	2	1
41	1	2	3	3	3	3	3	3	3	3	3	3	3	3	3	3	3	3	3	3	3	3	3	3	3
52	1	2	2	1	1	2	1	2	2	2	1	1	2	1	2	2	1	2	2	2	1	2	2	1	1
41	1	2	4	3	4	3	3	5	3	3	4	4	3	4	4	3	4	3	3	2	2	2	4	3	2
41	2	2	4	4	4	4	3	3	4	4	3	2	3	1	4	3	3	3	3	3	4	3	4	3	4
23	2	2	1	1	1	1	1	1	5	1	1	1	1	1	1	3	3	3	3	3	1	1	1	1	1
25	1	2	3	3	3	3	3	4	3	2	3	4	4	2	1	2	3	4	4	3	3	3	2	4	3
23	2	2	4	3	2	2	4	3	3	4	2	2	2	1	2	3	3	3	3	2	3	2	2	2	2
19	1	2	3	2	3	3	3	3	2	3	2	2	2	2	3	2	2	3	3	3	2	2	3	3	2
24	1	2	4	4	3	5	3	4	4	4	5	4	4	5	4	3	3	2	4	4	3	3	4	2	4
24	1	2	3	3	3	3	3	2	3	3	3	2	3	2	3	2	3	4	3	2	3	3	3	3	3
23	1	2	2	2	2	1	2	2	1	2	2	1	2	1	1	2	2	1	1	2	2	1	2	1	2
25	1	2	2	2	2	2	2	2	2	2	2	2	2	2	2	2	2	2	2	3	1	2	1	1	2
25	1	2	4	4	4	4	4	4	4	4	4	4	4	4	4	3	3	3	3	2	2	2	3	2	2
22	1	2	3	3	3	3	3	3	3	3	3	3	3	3	3	3	3	3	3	3	3	3	3	3	3
24	1	2	2	2	2	2	2	2	2	2	2	2	2	2	2	2	2	2	2	2	2	2	2	2	2
24	2	2	3	2	3	2	2	2	3	2	2	2	2	2	2	2	2	2	2	2	1	1	3	1	1
25	1	2	2	3	2	2	2	2	2	2	2	2	1	2	4	3	2	2	3	2	2	2	3	1	2
24	2	2	4	3	3	3	2	4	3	2	2	3	3	3	4	2	3	3	3	4	2	3	3	3	2
24	2	2	3	2	3	1	2	2	3	3	2	3	3	2	3	3	3	3	3	3	2	2	4	2	2
24	2	2	3	4	5	3	3	3	3	5	1	3	2	1	1	3	2	3	3	3	2	1	1	1	1
23	1	2	3	2	4	3	4	3	3	4	4	3	3	4	3	4	4	3	4	4	4	3	3	4	4
23	1	2	2	2	3	1	1	1	2	1	1	4	2	4	2	1	1	1	1	1	1	1	1	1	1
25	1	2	2	2	2	3	2	1	1	2	1	1	1	1	1	2	2	2	2	2	2	2	2	2	2
24	2	2	3	1	1	3	2	2	3	1	1	1	1	1	1	3	3	3	2	3	1	1	2	1	1
23	2	2	3	3	3	3	3	3	3	3	3	3	3	3	3	5	3	5	3	2	1	1	3	1	1
19	1	2	4	3	3	3	3	2	2	3	2	2	3	3	2	2	3	2	2	3	3	2	3	2	2
24	1	2	4	4	4	4	4	4	4	4	4	4	4	4	4	3	3	3	3	3	3	3	3	3	3
24	2	2	2	2	3	3	3	2	3	2	2	2	1	1	1	2	2	2	2	3	1	2	3	1	1
18	1	2	4	4	5	5	3	5	4	5	4	4	3	3	4	5	3	4	3	4	4	5	4	4	4
25	1	2	1	2	2	2	1	2	2	1	2	2	1	1	1	2	2	2	2	3	1	1	1	1	1
21	1	2	2	2	2	2	2	2	2	2	2	2	2	2	2	2	2	2	2	2	1	1	1	1	1
22	1	2	2	2	3	1	3	2	2	2	2	2	2	1	3	2	2	1	2	1	1	2	3	2	1
24	1	2	2	2	2	2	2	2	2	2	2	2	2	2	2	2	2	2	2	2	1	1	1	1	1
24	2	2	3	2	3	3	3	3	3	3	3	3	3	3	3	3	3	3	3	3	3	3	3	3	3
64	1	2	1	2	1	2	1	3	2	2	1	1	1	1	1	2	1	2	1	2	1	1	1	1	1
23	1	2	2	3	2	2	4	2	2	3	1	1	1	1	3	2	2	2	2	2	1	1	2	1	1
25	1	2	3	4	4	3	3	3	4	4	3	2	3	2	2	3	3	3	3	3	2	2	4	3	3
24	1	2	3	4	2	2	3	1	3	2	2	1	1	1	3	3	2	2	3	2	1	1	2	1	1
54	1	2	2	3	4	4	5	3	4	3	3	4	3	2	2	2	2	2	2	1	1	2	4	1	2
22	1	2	1	1	1	1	4	1	1	1	1	1	1	1	1	1	1	1	1	1	1	1	1	1	1
25	1	2	2	1	2	2	3	2	3	3	2	2	2	3	2	2	2	3	2	2	1	1	3	2	2
23	1	2	1	3	1	1	1	1	3	1	1	1	1	2	1	1	1	1	1	1	1	1	1	1	1
24	2	2	2	3	4	3	4	3	2	3	2	2	2	2	3	3	2	3	3	3	2	2	2	2	2
51	2	2	2	2	2	2	2	2	2	2	2	2	2	2	2	2	2	2	2	2	2	2	2	2	2
24	2	2	2	2	2	2	2	2	2	3	2	2	2	2	2	2	3	2	2	3	2	2	2	2	2
22	2	2	1	1	4	3	2	1	2	1	2	2	2	2	2	3	2	2	2	2	2	2	2	2	2
21	2	2	1	1	1	1	1	1	1	1	5	5	5	5	5	1	1	1	1	1	1	1	1	1	1
24	2	2	1	1	3	3	3	2	3	3	1	1	1	1	1	2	2	2	2	3	1	1	3	3	1
54	1	2	1	2	2	3	3	2	3	3	2	2	2	2	3	2	2	3	2	1	1	2	3	1	1
42	1	2	1	1	1	1	1	1	1	1	1	1	1	1	1	1	1	1	1	1	1	1	2	1	1
36	2	2	3	2	2	2	3	3	2	3	2	2	2	2	2	3	3	3	3	3	2	3	3	2	3
48	2	2	1	2	1	2	1	2	2	1	1	1	1	2	3	1	1	1	1	1	1	1	2	1	1
57	1	2	1	2	1	1	3	2	1	1	3	2	1	2	3	2	3	3	2	3	1	1	3	1	1
44	2	2	2	1	1	2	1	1	2	3	1	1	1	1	1	1	2	2	1	1	1	1	1	1	2
50	2	2	2	2	3	2	3	2	3	3	2	2	1	1	2	2	2	3	3	3	2	1	2	2	1
29	1	2	3	3	2	3	2	3	2	3	3	2	2	3	3	3	3	3	3	3	3	2	3	2	3
41	1	2	3	3	3	3	3	3	3	3	3	3	3	3	3	3	3	3	3	3	3	3	3	3	3
48	2	2	1	1	1	1	1	1	1	1	1	1	1	1	1	1	1	1	1	1	1	1	1	1	1
49	2	2	1	2	2	1	2	1	1	2	1	1	1	1	1	2	2	2	1	2	1	1	2	1	2
38	2	2	1	1	1	1	1	1	1	1	1	1	1	1	1	2	2	2	2	2	1	2	1	1	2
73	2	2	1	2	1	1	1	1	2	1	1	2	1	2	1	2	2	1	2	2	2	1	2	1	1
38	1	2	3	3	2	3	2	4	3	3	2	3	2	2	2	3	2	3	3	2	1	1	2	1	1
41	2	2	3	3	3	2	3	1	1	3	2	3	3	2	3	3	3	3	3	3	2	4	4	3	4
39	1	2	1	2	1	1	2	1	1	1	1	2	1	1	1	2	1	2	2	2	1	1	2	1	1
51	2	2	3	2	2	2	3	1	2	2	2	1	1	1	2	2	2	2	2	2	1	2	2	1	3
47	2	2	4	4	3	4	3	3	3	4	4	5	3	4	3	4	4	4	4	4	2	2	2	3	1
31	2	2	2	2	3	3	3	3	3	3	1	1	1	1	1	3	3	3	2	3	2	2	2	2	3
36	1	2	3	1	1	2	2	3	2	3	2	3	1	2	2	3	2	3	3	2	1	1	2	1	1
54	2	2	2	2	2	2	1	2	4	3	2	2	3	1	4	2	2	2	2	2	1	2	3	1	1
52	2	2	2	2	3	2	3	3	2	2	2	3	2	2	2	3	3	3	2	3	2	2	3	2	3
35	2	2	3	2	2	2	3	2	2	3	2	3	2	2	3	2	2	3	2	2	2	2	2	2	2
45	1	2	1	1	1	1	2	2	3	2	2	1	1	1	1	3	2	2	3	2	1	1	2	1	2
60	1	2	3	3	3	3	3	2	4	4	2	2	2	2	2	1	1	2	1	1	2	3	2	3	2
30	1	2	2	2	2	2	2	2	3	2	3	3	3	3	3	2	2	2	2	2	1	2	3	2	3
64	2	2	2	2	2	2	2	2	2	2	2	2	2	2	2	2	2	2	2	2	2	2	3	2	2
37	2	2	3	2	1	1	1	1	1	3	1	1	1	1	1	2	3	3	2	3	1	1	2	1	1
57	1	2	2	2	2	2	1	1	2	3	1	1	1	1	3	4	1	2	1	1	1	1	2	1	2
53	1	2	2	3	2	2	2	2	2	2	3	3	3	3	3	2	2	2	2	2	2	2	3	2	2
44	2	2	3	2	3	2	2	2	3	4	1	1	1	1	2	2	2	1	1	1	2	1	2	1	2
42	2	2	3	3	3	3	3	2	2	3	2	2	2	2	2	3	2	3	3	2	1	1	2	1	1
27	1	2	3	1	3	3	3	3	5	3	1	3	1	1	1	3	3	2	2	2	2	1	3	1	2
54	1	2	2	2	2	3	2	2	3	3	1	1	1	1	1	2	2	2	2	2	1	1	2	1	2
66	1	2	1	1	1	1	1	1	2	1	1	2	1	1	1	2	1	1	1	2	1	1	2	1	1
43	1	2	3	3	3	3	2	3	2	3	2	3	1	1	4	2	3	4	3	3	2	3	3	1	2
57	2	2	1	1	2	1	2	2	1	2	1	2	1	1	2	2	2	2	2	2	1	1	2	1	2
60	2	2	1	1	1	1	1	1	1	1	1	1	1	1	1	1	1	1	1	1	1	1	1	1	1
50	1	2	4	3	4	3	5	2	4	4	3	2	4	3	3	3	3	3	3	2	3	4	3	2	3
45	1	2	3	2	2	2	2	2	2	3	2	2	1	3	1	2	1	2	2	2	1	1	1	1	1
57	1	2	1	1	1	1	1	1	1	1	1	2	1	1	1	2	2	2	3	2	2	2	2	1	3
42	1	2	2	1	1	1	1	1	1	2	1	3	1	2	1	1	2	2	2	2	1	1	2	1	1
45	1	2	2	2	2	3	2	4	2	3	2	2	2	2	2	2	2	2	3	2	3	2	4	3	4
38	2	2	4	4	4	4	4	4	4	4	5	5	5	5	5	4	4	4	4	4	2	5	3	4	2
29	1	2	1	2	1	2	3	1	2	2	2	2	2	2	3	2	1	2	2	1	4	1	3	1	1
64	1	2	2	2	2	2	2	2	2	2	1	2	1	1	1	2	2	2	2	2	1	1	2	1	1
78	1	2	1	1	1	1	1	1	1	1	1	1	1	1	1	1	1	1	1	1	1	1	3	1	2
66	1	2	1	1	1	1	1	1	1	1	1	1	1	1	1	2	1	1	1	2	1	1	1	1	1
38	2	2	1	1	1	1	1	1	1	1	1	1	1	1	1	1	1	1	1	1	1	1	2	1	1
57	2	2	1	2	2	1	1	1	1	1	1	1	2	1	1	1	2	2	2	2	1	1	2	1	1
50	2	2	1	2	3	3	3	2	2	3	1	1	1	1	1	1	1	1	1	2	1	1	2	1	1
43	1	2	2	2	3	2	2	2	4	3	2	2	1	2	3	2	3	2	3	2	1	1	2	2	1
42	1	2	1	1	1	1	1	1	2	1	1	1	1	1	1	1	1	1	1	1	1	1	1	1	1
54	1	2	1	2	1	2	2	2	3	2	2	1	1	1	1	2	2	2	3	1	1	1	3	1	3
50	1	2	4	3	4	3	3	4	3	3	4	3	3	4	3	4	3	3	4	3	3	3	3	2	2
53	2	2	1	1	1	2	1	1	1	3	1	1	1	1	1	2	2	2	2	1	1	1	1	1	1
63	1	2	2	2	2	2	2	2	2	2	2	2	2	2	2	2	2	1	2	2	2	2	2	2	2
42	2	2	1	1	1	1	1	1	1	1	1	1	1	1	3	1	1	2	1	1	2	1	3	3	3
53	1	2	1	2	1	1	2	1	1	1	1	1	1	1	1	1	2	2	1	2	1	2	1	1	1
52	2	2	3	3	3	3	2	3	2	2	2	3	3	2	4	3	3	2	3	2	2	1	4	1	3
49	2	2	1	1	1	1	2	1	1	1	3	2	2	3	3	1	1	1	1	2	1	2	2	2	3
49	1	2	2	2	2	2	2	2	2	1	2	1	1	2	2	3	2	2	3	2	1	2	2	1	2
54	2	2	2	2	2	2	3	2	2	2	3	4	2	3	4	3	2	2	2	2	1	1	2	1	1
44	2	2	1	1	1	1	1	1	1	1	1	1	1	1	1	1	1	1	1	2	1	1	1	1	1
57	1	2	2	1	1	1	1	2	1	1	1	1	1	1	1	1	1	1	1	2	1	2	3	1	2
50	2	2	2	3	2	2	3	2	2	2	2	2	2	2	2	2	2	2	2	2	1	1	1	1	1
41	1	2	3	2	2	2	1	1	3	2	1	1	1	1	1	2	2	2	2	2	1	1	1	1	1
47	1	2	4	3	4	4	3	4	3	5	2	1	1	1	2	3	3	3	3	3	3	1	4	3	2
54	1	2	1	1	3	2	2	1	1	1	1	2	1	1	3	2	1	2	1	2	1	1	1	1	1
49	2	2	1	2	1	2	1	2	3	4	1	1	1	1	1	3	1	2	3	2	1	1	2	1	2
58	1	2	1	1	1	2	1	2	2	2	2	2	1	1	2	2	1	2	2	2	1	1	2	1	1
49	2	2	2	2	2	2	2	2	3	3	1	2	1	1	3	2	2	2	2	2	2	2	4	2	3
41	1	2	1	1	2	1	2	1	2	2	1	1	1	1	1	2	2	2	2	1	1	1	3	1	1
44	1	2	2	2	2	2	2	2	2	2	1	2	1	1	2	2	2	2	2	2	2	1	3	1	2
35	1	2	1	2	1	1	1	1	2	1	1	1	1	2	1	1	1	2	2	1	1	1	1	1	1
47	2	2	2	2	3	2	2	2	2	2	2	2	2	2	3	2	2	2	2	2	2	2	2	2	2
62	1	2	2	2	1	2	1	1	3	1	1	1	1	1	1	1	2	1	1	2	3	2	4	1	3
51	2	2	1	2	2	3	1	1	1	1	1	1	1	1	1	1	1	1	1	1	1	1	2	1	1
56	1	2	1	1	1	1	2	2	1	2	2	2	1	1	1	1	1	2	2	1	2	1	3	1	1
43	1	2	3	3	3	3	4	3	3	3	4	4	3	3	3	4	3	3	4	3	3	2	3	3	2
47	1	2	2	2	4	2	2	1	2	2	2	2	2	2	2	1	3	3	2	2	2	2	2	2	2
53	2	2	1	1	1	1	2	1	1	1	2	1	1	1	3	1	1	1	1	1	1	1	3	1	1
56	1	2	4	4	4	4	2	1	4	5	1	1	1	1	1	3	4	2	2	3	1	3	4	1	1
48	1	2	3	3	2	2	3	2	2	3	4	4	3	3	3	2	2	3	3	2	2	2	2	2	2
43	1	2	2	2	2	2	2	2	2	2	2	2	2	2	2	2	2	2	2	2	2	2	2	2	2
50	1	2	2	2	3	3	5	2	3	2	2	2	2	3	2	3	2	3	2	1	2	2	3	2	2
55	1	2	3	3	2	3	2	2	3	4	2	1	2	1	2	2	2	2	2	2	1	1	2	1	2
48	1	2	2	3	2	1	3	3	3	1	4	4	3	5	2	3	2	3	2	2	1	1	1	1	1
57	1	2	2	2	2	2	2	2	3	3	2	3	2	3	3	3	3	2	3	3	2	3	2	2	2
58	1	2	1	1	1	1	2	1	1	1	1	1	1	1	1	1	2	1	1	1	1	1	1	1	2
47	1	2	1	1	2	2	1	2	2	2	1	1	1	1	2	1	1	1	2	2	1	2	2	1	1
51	1	2	3	2	4	3	3	2	2	3	2	4	3	4	4	2	2	2	2	1	2	2	4	1	3
58	2	2	1	1	1	1	1	1	2	2	1	1	1	1	1	1	1	1	2	2	1	1	2	1	1
38	1	2	2	2	2	2	2	2	2	2	1	1	1	1	1	1	1	1	1	1	1	1	3	1	1
39	1	2	3	1	1	1	1	1	1	1	1	2	1	1	2	2	2	2	2	2	1	1	3	1	1
54	1	2	1	1	4	1	1	1	1	4	1	1	1	1	1	1	1	1	1	1	1	1	1	1	1
54	1	2	1	1	1	1	1	1	1	1	1	1	1	1	1	1	1	1	2	1	1	1	1	1	1
40	1	2	3	2	2	3	3	3	3	3	3	3	2	4	3	2	3	2	2	2	2	2	3	1	2
53	2	2	3	2	2	3	2	2	3	2	2	2	2	1	2	2	2	2	2	2	2	2	3	2	2
51	2	2	2	2	2	1	2	3	2	4	1	3	1	2	3	2	2	3	4	4	4	4	4	1	2
61	1	2	2	2	2	2	2	2	2	2	1	1	1	1	1	2	2	2	2	2	1	2	2	1	1
56	1	2	3	2	2	3	2	2	2	3	2	2	1	2	2	2	2	2	2	2	1	2	2	2	2
47	1	2	3	2	2	3	3	2	4	3	2	2	2	2	2	2	2	2	2	2	2	2	2	2	2
57	2	2	3	2	3	2	2	2	2	3	1	2	1	2	2	2	2	2	2	2	2	2	3	2	2
41	2	2	3	2	3	2	2	3	2	3	3	2	3	2	3	3	3	3	2	2	2	1	2	1	1
49	1	2	3	3	3	3	3	2	2	3	3	3	3	3	3	2	2	2	2	2	2	2	2	1	1
49	2	2	2	2	2	3	2	1	2	1	1	1	1	1	3	1	1	2	2	1	1	1	2	1	1
55	1	2	3	2	3	2	3	2	2	3	1	2	2	1	2	2	2	2	2	2	1	2	1	1	1
49	1	2	2	1	2	1	2	1	1	1	1	1	1	1	2	2	1	1	2	2	1	1	2	1	1
44	1	2	2	2	2	2	2	1	2	2	2	1	1	1	2	2	1	2	2	2	1	1	2	1	1
59	1	2	2	2	2	2	2	2	2	2	2	2	1	2	2	2	2	3	3	2	2	2	2	1	2
57	1	2	1	2	3	2	2	2	3	3	2	3	1	1	2	2	1	3	2	2	1	1	2	1	1
61	1	2	3	2	2	2	2	2	2	2	2	1	3	2	2	3	2	2	2	2	2	1	3	2	1
41	1	2	2	2	1	2	2	2	1	2	1	1	1	1	2	1	1	1	2	2	1	1	2	1	1
55	1	2	3	2	3	2	2	2	3	3	2	1	2	1	2	2	2	1	1	2	2	2	3	1	3
46	2	2	5	5	5	5	5	3	5	5	4	5	5	2	5	5	5	5	5	3	2	2	3	3	3
52	1	2	1	2	3	2	2	2	2	2	2	2	1	2	3	2	2	2	2	2	2	3	3	1	2
46	2	2	3	2	3	3	3	3	2	3	2	3	2	1	2	3	4	4	3	3	2	2	4	3	3
52	1	2	2	2	2	2	2	2	2	3	1	1	1	1	1	2	2	2	2	2	3	3	3	2	3
50	1	2	4	3	2	2	1	3	3	4	1	1	1	1	1	4	3	4	4	3	2	3	2	3	2
27	2	2	3	3	1	1	4	2	1	3	2	2	3	4	2	2	1	3	2	2	2	1	2	1	1
58	2	2	1	1	3	1	1	1	1	1	1	1	1	1	1	2	1	1	1	1	1	1	1	1	2
54	2	2	2	2	2	2	2	2	2	2	2	2	2	2	2	2	2	2	2	2	2	2	3	2	2
56	2	2	3	2	3	3	2	2	3	3	1	2	2	1	3	2	2	2	2	2	2	1	2	1	2
57	2	2	1	1	1	1	1	1	1	1	1	1	1	1	1	1	1	1	1	1	1	1	1	1	1
55	2	2	1	2	1	1	1	2	2	2	1	1	1	1	1	1	1	1	1	2	1	1	2	1	1
54	2	2	1	2	1	1	1	1	2	1	1	1	1	1	1	2	3	2	3	3	2	3	2	2	2
56	2	2	2	1	2	2	2	1	1	2	1	1	1	1	1	1	1	1	1	1	1	1	1	1	1
54	2	2	1	1	1	1	1	1	1	1	1	2	1	1	1	1	2	2	1	2	1	1	1	1	1
59	2	2	2	2	2	2	3	2	2	3	1	2	1	1	1	2	2	2	2	2	2	1	2	1	1
58	2	2	1	1	1	1	1	1	1	1	1	1	1	1	1	1	1	1	1	2	1	1	2	1	1
54	2	2	3	2	2	2	2	1	1	3	2	1	2	1	3	2	2	2	2	3	2	1	3	2	2
26	1	2	3	3	2	2	2	3	4	3	2	3	2	2	2	3	2	3	3	2	1	2	3	1	2
55	2	2	2	2	3	2	2	2	2	3	1	1	1	1	1	2	2	2	2	3	1	1	2	1	2
30	2	2	1	1	2	1	2	1	3	2	1	1	1	1	1	2	2	2	2	2	1	1	2	1	1
33	1	2	3	2	1	2	2	1	2	3	2	1	2	2	3	2	2	1	2	2	1	1	3	1	2
27	2	2	3	1	2	1	2	2	3	3	1	2	1	1	3	2	3	1	2	1	1	1	1	1	1
33	2	2	1	2	1	1	1	1	1	1	1	1	1	1	1	1	1	1	1	1	1	1	1	1	1
33	1	2	2	2	2	2	2	1	2	2	1	1	1	1	1	2	2	2	2	2	1	1	1	1	1
66	1	2	1	1	1	1	2	2	2	2	1	1	1	1	1	2	2	2	2	2	1	1	2	1	1
34	2	2	3	1	3	1	1	2	3	1	2	2	1	1	1	3	3	2	3	2	2	3	4	2	3
53	1	2	3	3	3	3	3	3	3	3	3	3	3	3	3	3	3	3	3	3	3	3	3	3	3
52	2	2	1	1	2	1	2	1	2	1	1	1	1	1	1	2	1	2	2	2	2	1	1	1	2
58	1	2	1	1	1	1	1	1	1	1	1	1	1	1	1	1	1	1	1	1	1	1	1	1	1
52	1	2	1	2	1	1	3	2	3	1	1	2	1	1	1	2	1	2	2	2	1	1	2	1	2
58	2	2	1	1	1	1	2	1	1	2	1	1	1	1	1	2	2	1	1	1	1	1	2	1	1
39	2	2	1	2	2	2	2	2	2	3	1	2	1	1	2	2	2	2	2	2	2	1	2	1	2
30	1	2	3	4	4	2	3	2	3	4	2	3	2	3	3	4	4	4	4	4	2	2	4	2	2
36	1	2	2	2	2	2	2	4	2	2	2	2	2	2	2	2	2	2	2	2	2	2	2	2	2
64	2	2	2	2	2	2	2	2	2	2	2	2	2	2	2	2	2	2	2	2	2	2	2	2	2
45	1	2	1	2	1	1	2	2	1	2	2	2	2	2	2	1	1	2	1	2	1	1	2	1	1
54	2	2	2	2	2	3	1	2	3	3	1	1	2	1	2	1	1	2	1	1	1	1	1	1	1
56	1	2	2	2	2	2	2	2	2	2	1	2	2	1	2	1	1	1	1	1	1	1	1	1	2
61	1	2	2	2	3	3	1	2	3	4	3	1	1	1	4	3	2	3	2	3	1	1	3	1	1
61	1	2	1	2	1	1	1	1	2	1	1	2	1	1	1	1	1	1	1	1	1	1	2	1	1
51	1	2	1	1	1	1	2	1	1	2	1	1	1	1	2	2	2	2	1	2	1	1	2	1	2
54	2	2	2	1	2	1	1	2	2	1	1	2	1	1	1	2	2	2	2	2	2	1	2	1	2
26	2	2	4	4	4	4	4	3	4	4	1	1	3	1	2	3	3	3	3	3	3	2	4	3	3
63	1	2	1	1	1	1	1	1	2	2	1	1	1	1	1	1	1	1	1	1	1	1	2	1	1
54	2	2	1	1	2	1	1	1	2	1	1	1	1	1	2	2	1	1	1	1	1	1	2	1	2
46	2	2	1	3	2	2	2	2	2	1	2	3	1	3	1	2	2	2	2	2	1	1	1	1	2
46	2	2	2	2	3	3	1	2	3	4	2	2	2	2	2	1	2	1	1	1	1	3	2	1	3
51	1	2	2	2	2	2	2	2	2	2	2	2	2	2	2	2	2	2	2	2	2	2	2	2	2
52	1	2	2	1	3	3	2	2	3	3	2	2	2	2	4	2	2	2	2	2	2	2	2	1	2
47	2	2	2	2	2	2	2	2	2	3	3	2	1	3	4	2	2	3	2	3	4	1	3	1	2
61	1	2	1	1	1	1	1	1	1	1	1	2	1	1	2	2	2	2	2	2	1	1	2	1	2
61	1	2	2	3	1	3	2	3	2	2	3	4	2	3	2	2	2	3	3	2	1	1	2	1	2
65	1	2	1	2	2	2	1	1	1	1	1	1	1	2	1	2	2	2	2	2	2	1	1	1	1
49	1	2	3	3	3	3	2	2	3	3	2	3	2	1	2	2	2	2	2	2	2	3	3	2	3
60	2	2	3	2	3	3	3	3	3	4	3	2	2	2	2	2	2	2	2	2	2	3	3	2	3
53	1	2	2	2	2	1	2	2	2	2	2	1	2	2	3	3	2	2	2	2	1	1	1	1	2
49	2	2	2	2	3	2	3	1	3	3	1	2	1	1	2	2	2	2	2	2	1	1	3	1	1
53	1	2	1	1	1	1	2	1	2	2	1	1	1	1	2	2	1	2	1	2	1	1	2	1	1
59	1	2	3	2	2	2	2	2	2	3	2	2	2	2	3	2	2	2	2	2	2	2	2	2	2
46	1	2	3	2	2	3	1	1	3	4	3	2	1	1	3	2	2	2	2	1	2	2	4	2	3
52	1	2	1	2	2	2	2	2	1	1	1	1	1	1	1	2	2	2	2	3	2	2	2	2	2
40	1	2	4	3	4	4	3	3	1	4	4	2	4	2	4	5	3	3	4	2	1	1	1	1	1
52	1	2	1	2	1	1	2	1	1	3	2	2	1	2	4	3	3	3	3	2	1	1	4	3	2
46	2	2	5	5	5	5	5	3	2	5	4	4	4	4	4	4	4	4	4	4	4	4	4	4	4
47	1	2	5	3	5	5	4	3	5	5	4	1	3	2	4	4	4	4	3	3	2	3	4	3	4
27	2	2	3	2	3	2	2	3	2	3	1	1	2	2	1	2	2	2	2	3	1	1	1	1	1
53	2	2	1	1	1	1	1	1	1	1	1	1	1	1	1	1	1	1	1	1	1	1	1	1	1
63	2	2	1	1	1	1	1	1	1	1	1	1	1	1	1	1	1	1	1	1	3	2	2	1	3
51	1	2	2	2	2	2	2	2	3	2	1	3	1	1	2	2	2	1	2	1	1	1	2	1	1
53	1	2	2	2	1	1	1	1	2	1	1	1	1	1	1	1	1	1	1	1	1	1	1	1	1
57	1	2	1	2	2	1	1	1	2	1	1	1	1	1	1	1	1	1	1	1	1	1	2	1	2
45	2	2	1	1	1	1	1	1	1	1	1	1	1	1	1	1	1	1	1	1	1	1	1	1	1
63	1	2	1	1	1	1	1	1	1	1	1	1	1	1	1	1	1	1	1	2	1	1	2	1	2
37	2	2	4	5	4	3	5	4	4	5	5	5	4	5	2	3	3	3	3	3	2	1	4	2	2
50	1	2	2	1	3	2	2	2	1	2	1	1	1	1	1	1	1	1	1	1	1	1	2	1	1
63	1	2	2	1	1	1	1	1	2	2	1	1	1	1	3	1	1	1	1	1	1	1	1	1	1
58	1	2	3	3	3	3	3	3	3	3	3	4	3	4	4	3	3	3	3	3	3	3	3	3	3
49	2	2	2	2	2	2	2	2	2	2	1	2	1	1	1	2	2	2	2	2	2	2	2	2	2
46	2	2	1	1	3	2	1	2	2	2	2	3	1	1	1	2	2	3	2	2	2	1	1	1	2
59	1	2	1	1	1	1	1	1	1	1	1	1	1	1	1	1	1	1	1	1	1	1	1	1	1
50	1	2	4	4	4	4	4	4	4	4	3	4	3	2	3	2	2	2	2	2	2	3	3	2	3
44	2	2	1	1	1	1	1	1	1	1	1	1	1	1	1	1	1	1	1	1	1	1	1	1	1
25	2	2	2	1	2	2	2	2	3	1	1	1	1	1	1	2	2	2	2	2	1	1	2	1	2
58	2	2	3	3	3	3	3	3	2	3	2	2	3	2	3	3	3	3	2	3	3	3	4	2	3
53	1	2	2	2	2	2	2	2	2	2	3	2	3	3	3	3	2	2	2	2	1	1	2	2	1
59	2	2	2	2	2	1	2	2	2	1	2	2	1	2	1	2	1	2	2	2	1	1	2	1	1
42	1	2	2	1	1	2	1	2	3	2	1	2	1	2	1	2	2	3	2	2	2	2	2	1	2
54	1	2	1	1	1	1	1	1	1	1	1	1	1	2	1	1	1	1	1	1	1	1	2	1	1
60	1	2	2	2	2	1	2	2	2	3	1	1	2	2	2	1	1	1	1	1	1	1	2	1	1
29	2	2	3	3	3	3	3	3	3	3	3	3	3	3	3	3	3	3	3	3	3	3	3	3	3
51	1	2	3	1	4	2	3	2	3	3	1	2	1	1	2	2	2	2	2	2	1	1	1	1	2
35	1	2	1	1	1	1	1	1	1	1	1	1	1	1	1	1	1	2	1	2	1	1	2	1	1
50	2	2	2	2	2	2	3	1	3	1	2	3	1	1	1	2	1	2	1	1	1	1	2	1	1
50	1	2	2	1	1	2	2	1	2	2	1	1	1	1	2	2	2	2	2	1	1	1	2	1	1
41	1	2	1	2	1	1	2	1	1	1	1	1	1	1	1	1	1	1	1	1	1	1	1	1	1
52	1	2	1	1	1	1	1	1	1	1	1	2	1	2	1	2	2	2	2	2	2	2	2	2	2
56	1	2	3	2	4	3	3	2	2	3	2	1	1	1	1	1	2	1	1	1	1	1	1	1	1
24	2	2	3	3	3	2	4	4	2	3	3	3	3	3	2	3	2	2	2	2	1	1	2	1	1
52	2	2	4	4	5	4	5	4	3	5	5	1	5	1	1	4	4	4	4	3	4	3	3	3	3
72	1	2	1	1	1	1	1	1	1	1	1	1	1	1	1	1	1	1	1	1	1	1	1	1	1
54	1	2	1	3	3	2	1	1	2	3	1	1	1	1	2	3	3	2	3	2	2	3	3	2	3
53	2	2	3	2	3	3	3	2	2	3	3	2	2	2	4	2	3	2	3	2	2	3	3	2	3
51	2	2	1	1	1	1	3	1	1	1	1	3	1	1	2	2	2	2	2	3	2	2	2	2	2
56	1	2	2	1	3	2	1	1	2	3	1	1	1	1	1	1	1	2	1	1	1	1	1	1	1
50	2	2	3	1	1	1	2	1	1	1	2	1	2	2	1	1	1	3	1	1	2	2	4	2	3
32	2	2	2	2	2	2	2	2	2	3	1	1	1	1	1	2	2	2	2	2	2	2	2	2	2
54	1	2	3	3	4	3	3	2	3	4	2	1	2	1	2	3	2	3	2	2	2	2	2	2	2
57	2	2	4	4	5	4	5	2	3	5	4	4	5	3	4	2	3	3	3	3	2	2	3	3	4
25	1	2	2	3	3	3	2	3	3	2	2	2	2	3	3	3	4	3	3	3	3	2	2	3	3
52	2	2	1	3	1	1	1	1	1	3	4	5	4	4	4	2	1	1	2	1	1	1	1	1	1
59	2	2	1	1	2	2	2	2	1	1	1	2	1	1	1	1	1	2	1	2	2	1	2	1	2
54	2	2	2	2	2	2	2	2	2	2	2	1	1	1	2	2	1	2	1	2	2	2	2	2	2
57	2	2	2	2	2	2	2	2	2	4	3	3	2	3	4	2	2	2	2	2	1	1	1	1	1
43	2	2	3	2	3	3	2	2	3	3	1	2	1	1	1	2	2	2	1	2	4	1	2	1	1
54	1	2	3	2	2	3	2	2	2	1	2	1	1	2	2	1	1	2	2	1	2	2	3	1	2
55	2	2	3	2	3	3	3	3	4	3	2	2	2	2	2	3	3	3	3	2	3	2	2	2	2
56	2	2	2	2	2	2	2	2	3	2	2	2	1	1	2	2	2	2	2	2	2	1	3	1	3
60	2	2	5	4	5	5	5	4	5	5	5	5	4	3	4	2	2	1	2	1	2	2	4	2	2
60	2	2	3	3	4	3	2	2	3	4	1	2	2	1	2	2	2	2	2	3	2	2	3	2	2
60	2	2	2	2	3	2	2	2	3	2	1	2	1	1	1	2	2	2	3	3	2	2	3	2	2
56	2	2	2	2	2	2	3	2	3	3	3	3	2	3	4	2	1	2	2	1	3	3	3	2	3
58	2	2	2	2	2	2	1	2	2	2	2	3	1	2	3	2	2	2	2	2	2	3	3	2	3
58	2	2	1	1	1	2	1	1	1	1	1	2	1	2	2	2	2	3	2	2	1	1	2	1	1
31	1	2	2	2	2	3	3	2	3	2	2	3	1	1	2	2	3	3	3	3	1	2	3	1	2
47	1	2	2	2	2	1	2	2	2	2	2	3	2	2	2	2	2	2	2	2	1	1	1	1	1
64	2	2	1	1	1	1	1	1	1	1	4	3	2	4	4	1	1	1	1	1	1	1	1	1	2
39	1	2	1	1	1	1	1	2	1	1	1	1	1	1	1	1	1	1	1	1	1	1	1	1	2
37	1	2	2	1	1	2	1	1	1	2	2	1	1	1	1	2	1	2	3	2	1	1	2	1	1
25	1	2	4	2	1	3	2	2	2	3	2	1	1	2	4	3	2	3	2	2	1	1	1	1	1
26	1	2	2	2	3	2	3	2	2	3	2	2	2	2	2	2	2	3	2	2	1	1	2	1	2
25	1	2	3	4	4	3	4	3	3	3	4	3	4	4	5	2	1	3	2	2	2	1	2	1	1
38	2	2	2	2	2	2	2	2	2	3	2	2	2	1	2	2	2	2	2	2	2	2	3	2	2
44	1	2	3	3	3	2	3	2	3	4	2	2	2	2	2	2	2	2	2	2	2	2	3	2	2
37	1	2	2	2	2	2	2	2	2	2	2	2	2	2	2	2	2	2	2	2	2	2	2	2	2
37	1	2	2	2	2	1	2	2	3	3	2	3	2	2	3	2	2	2	2	2	2	1	3	1	3
46	2	2	2	2	2	2	2	2	2	3	2	2	1	1	1	2	2	2	2	2	1	1	2	1	2
49	1	2	2	1	1	1	2	1	1	1	3	4	1	4	2	1	1	1	1	1	1	1	3	1	2
51	2	2	1	1	1	1	1	1	2	2	1	1	1	1	1	1	1	2	1	1	2	1	2	1	2
65	1	2	1	2	1	2	2	2	2	2	3	2	3	2	2	2	2	2	2	2	1	1	1	1	1
62	1	2	2	2	2	2	2	1	3	2	1	1	1	1	1	2	2	2	2	2	2	2	3	2	2
56	1	2	3	3	3	3	1	2	3	4	2	3	3	1	3	2	1	1	2	2	2	2	2	1	2
60	1	2	1	1	2	2	1	1	1	2	1	1	1	1	1	1	2	1	1	2	2	2	2	1	2
54	1	2	3	3	3	2	2	2	4	2	1	2	1	2	2	3	3	3	3	3	1	1	2	1	2
47	2	2	3	3	3	3	2	2	3	4	2	2	2	2	3	2	2	2	2	2	2	2	3	2	2
44	1	2	1	1	2	2	2	3	2	1	2	1	1	1	1	1	1	2	1	2	1	1	2	1	2
42	1	2	5	5	5	4	3	5	4	5	5	5	4	5	5	4	4	4	4	4	4	3	4	3	3
49	2	2	3	2	2	2	2	2	2	3	2	2	1	1	1	2	2	2	2	2	1	1	1	1	1
64	1	2	2	2	2	2	2	2	3	2	2	1	1	1	2	2	2	2	1	2	1	1	2	1	1
36	2	2	3	2	2	2	4	2	2	3	2	2	2	1	3	2	2	2	2	2	2	3	3	1	2
53	2	2	1	1	1	2	1	1	1	3	1	3	2	2	2	1	1	2	1	2	1	1	2	1	2
43	1	2	2	2	2	2	2	2	2	2	2	2	1	2	2	2	1	2	2	2	2	2	2	2	1
49	2	2	2	2	2	2	2	2	2	2	2	2	2	2	2	2	2	2	2	2	2	2	2	2	2
54	1	2	2	2	3	2	2	2	2	2	1	1	2	2	2	2	2	2	2	3	3	2	3	1	1
37	1	2	2	2	2	2	2	2	2	2	1	1	1	1	1	1	1	1	1	1	1	1	1	1	1
56	1	2	2	2	1	2	1	2	2	3	1	1	1	1	2	1	2	2	2	3	2	2	1	1	1
25	2	2	2	3	2	2	3	3	2	3	2	1	2	2	2	2	2	2	2	3	2	2	2	2	2
45	2	2	2	1	2	1	2	1	1	2	1	1	1	1	1	1	1	1	2	2	2	1	3	1	2
45	1	2	4	3	4	3	4	2	2	4	3	3	4	2	4	2	2	2	2	2	2	3	3	3	2
68	1	2	1	1	1	1	1	1	1	1	1	1	1	1	1	1	1	1	1	2	1	1	1	1	1
59	1	2	1	1	1	1	1	2	2	2	1	1	1	1	1	1	1	1	2	2	1	1	2	1	1
44	1	2	4	2	4	3	1	3	4	4	2	2	1	1	2	3	3	3	2	2	2	2	3	1	3
58	1	2	2	3	2	3	2	2	2	2	2	2	1	2	3	3	2	3	3	2	2	2	2	1	2
42	1	2	2	1	2	1	1	1	1	2	1	1	1	1	1	2	2	2	2	2	1	1	2	2	1
55	1	2	1	1	1	1	1	1	1	1	1	1	1	1	1	1	1	1	1	1	1	1	1	1	1
49	1	2	3	2	2	2	2	2	3	4	3	2	3	2	3	2	2	2	2	2	2	2	2	2	2
61	1	2	2	2	2	2	2	2	2	2	2	2	2	2	2	2	2	2	2	2	2	2	2	2	2
47	1	2	2	2	2	2	2	2	2	2	2	2	2	2	2	3	2	2	2	3	2	3	2	2	2
57	1	2	3	2	3	3	3	2	2	2	1	2	2	1	3	2	2	3	2	2	2	2	3	2	1
59	1	2	2	1	1	2	1	1	2	1	1	1	1	2	1	2	2	2	2	2	1	1	2	1	1
53	1	2	2	1	2	2	2	1	2	1	1	2	2	1	1	2	1	2	1	2	1	1	2	1	1
45	1	2	1	2	2	2	2	3	2	2	2	2	2	2	3	3	2	2	2	2	1	1	2	1	2
37	1	2	2	2	2	1	2	2	2	2	2	1	1	2	2	2	2	2	2	1	1	1	2	1	2
52	1	2	2	2	2	2	2	2	2	2	2	3	2	2	3	2	2	2	2	2	2	2	2	2	2
52	1	2	2	1	1	1	1	1	1	2	3	3	3	3	3	2	2	2	2	2	1	3	3	1	3
25	1	2	2	2	3	3	4	3	3	2	1	2	1	1	2	3	3	3	2	3	1	2	3	2	2
52	1	2	1	1	1	1	1	1	1	1	1	1	1	1	1	2	1	2	2	2	1	1	1	1	1
32	1	2	3	3	1	1	4	2	1	2	4	4	3	4	1	3	1	3	3	3	1	1	1	1	1
22	2	2	1	2	1	1	2	2	3	2	2	1	1	1	1	3	1	2	2	2	1	1	1	1	1
60	1	2	1	1	1	1	1	1	1	2	1	1	1	1	1	1	1	1	1	1	1	1	3	1	2
43	1	2	1	1	1	1	1	1	1	2	1	1	1	1	1	1	1	1	1	1	1	1	1	1	1
62	1	2	1	3	1	2	1	2	2	3	3	4	1	4	5	2	1	1	2	1	1	1	3	1	2
49	1	2	4	3	5	4	5	4	4	5	3	2	1	1	4	3	4	4	4	3	3	3	4	3	3
26	1	2	2	2	2	2	2	1	3	2	2	2	1	1	1	2	2	2	2	2	2	1	3	1	1
56	1	2	3	2	4	3	3	2	3	4	2	2	2	3	2	3	2	2	2	3	1	1	1	1	1
60	1	2	1	1	1	1	1	1	1	3	1	2	1	1	1	2	2	1	2	1	1	1	3	1	1
50	1	2	3	2	2	2	2	2	3	3	1	2	1	1	1	3	2	2	3	2	1	1	3	1	1
57	1	2	2	2	3	2	3	2	2	2	2	2	2	2	4	2	2	2	2	2	3	3	2	3	3
25	2	2	2	2	2	2	3	1	3	2	1	2	1	1	1	2	3	3	2	2	1	1	1	1	1
51	1	2	3	3	3	3	3	3	3	3	2	3	2	2	2	3	3	3	3	3	3	3	3	3	2
37	1	2	4	3	4	4	4	3	4	4	3	2	3	2	3	2	2	3	2	2	3	4	3	2	2
37	1	2	2	2	2	2	2	2	2	2	2	2	2	2	2	2	2	2	2	2	2	2	2	2	2
62	1	2	2	2	2	1	2	2	2	2	1	1	1	1	1	2	2	2	2	2	1	1	2	1	1
47	1	2	1	1	1	1	1	1	3	1	1	1	1	1	2	1	1	1	1	1	1	2	4	1	2
48	1	2	2	1	2	2	1	2	3	2	1	1	1	1	1	2	2	2	2	2	1	2	2	1	2
48	1	2	1	2	3	2	1	1	2	4	1	2	1	1	1	3	3	2	3	3	4	2	2	1	2
51	1	2	1	1	1	1	1	1	1	1	1	1	1	1	1	1	1	1	1	1	1	1	3	1	1
27	1	2	2	1	2	1	3	4	2	1	2	2	1	2	3	4	3	4	4	3	1	1	2	1	1
57	1	2	2	2	2	2	2	2	3	3	2	2	2	2	2	2	2	2	2	2	2	2	2	1	2
62	1	2	2	3	4	2	3	2	3	3	2	2	1	1	3	1	2	2	1	2	2	2	3	1	3
55	1	2	2	2	2	2	2	2	2	2	3	2	2	3	3	2	2	3	2	3	2	3	2	2	3
31	1	2	1	2	2	1	2	2	2	1	2	3	3	3	2	1	1	2	1	1	1	1	1	1	1
37	1	2	1	1	2	2	2	1	2	2	1	1	1	1	1	1	2	2	1	1	1	1	2	1	2
38	2	2	5	2	2	2	2	1	3	5	5	1	5	1	5	1	1	2	2	1	2	3	5	1	3
44	1	2	1	1	2	1	2	2	3	1	2	3	1	2	3	2	2	3	2	2	1	2	3	1	3
44	1	2	2	3	2	2	3	3	3	3	3	2	2	3	3	2	2	2	2	2	1	1	2	1	1
40	2	2	2	1	1	1	1	1	2	2	1	1	1	1	1	2	2	2	2	2	1	1	1	1	1
41	1	2	3	2	2	3	3	2	2	2	2	2	2	1	2	2	2	2	2	2	1	1	2	1	1
40	2	2	3	2	3	3	2	2	4	3	2	2	1	1	2	2	2	2	2	2	1	2	2	1	2
39	1	2	1	1	3	1	2	3	2	3	1	1	1	1	1	2	2	2	2	2	1	1	1	1	1
33	1	2	2	2	2	2	3	2	2	3	2	2	2	2	2	2	2	2	2	2	2	2	2	2	2
43	2	2	2	1	1	2	2	1	1	1	2	3	2	2	3	2	2	2	1	2	1	1	1	2	1
48	2	2	3	2	4	2	2	2	2	4	2	3	2	2	2	2	2	2	2	2	2	2	4	2	3
44	2	2	3	2	3	3	4	3	2	4	3	3	2	3	3	3	3	3	3	2	2	2	3	1	3
37	1	2	2	1	1	2	1	1	1	2	1	1	1	1	1	2	2	2	2	2	1	1	2	1	2
36	1	2	2	2	2	2	4	2	2	2	2	2	2	2	2	2	2	2	2	3	3	2	4	2	3
54	1	2	1	1	1	1	1	1	1	1	1	1	1	1	1	1	1	1	1	1	1	1	1	1	1
44	2	2	2	2	2	2	3	3	2	2	2	2	2	1	3	2	2	2	2	2	2	2	3	3	3
51	1	2	1	2	1	1	2	1	2	3	2	2	2	2	2	2	2	2	2	2	1	2	2	2	1
39	1	2	2	2	2	2	1	2	3	1	2	2	1	1	2	2	3	3	3	2	2	2	3	1	2
51	2	2	3	3	3	3	3	2	2	3	3	2	3	2	3	3	2	2	3	2	2	2	3	1	2
52	2	2	1	1	1	1	1	2	1	2	4	3	4	4	4	1	1	2	1	2	1	2	2	2	2
45	2	2	1	1	2	2	2	2	3	2	1	1	1	1	2	2	3	3	3	3	1	1	2	1	2
45	1	2	4	3	3	4	4	3	4	4	3	3	1	2	4	3	3	3	3	3	2	2	4	2	3
37	2	2	1	1	1	1	1	1	1	2	3	2	1	3	2	1	1	1	1	1	1	1	1	1	1
40	1	2	1	2	2	1	2	1	3	1	3	3	2	3	3	2	2	1	2	2	1	1	3	1	1
53	1	2	1	2	1	1	1	2	1	2	1	2	1	2	1	2	2	2	2	2	1	1	2	1	2
37	1	2	3	3	3	2	2	2	2	2	2	2	2	3	2	2	3	2	2	3	3	2	2	3	2
38	1	2	2	1	1	2	3	1	1	2	1	3	2	2	2	2	2	1	2	1	1	1	2	1	1
52	2	2	1	2	1	1	1	1	1	1	1	1	1	1	1	1	1	1	1	1	1	1	1	1	1
55	1	2	1	1	1	1	1	1	1	1	1	1	1	1	1	1	1	1	1	1	1	1	2	1	1
54	1	2	2	2	3	2	2	2	4	4	1	2	1	1	1	2	2	2	2	2	2	1	3	1	2
44	2	2	3	2	2	3	2	3	4	4	2	3	1	1	2	2	2	2	2	2	2	2	2	2	2
54	1	2	3	2	3	4	2	3	3	4	1	1	1	1	1	2	2	2	2	2	3	2	2	1	1
54	2	2	2	2	2	2	2	2	2	2	2	2	2	2	2	2	2	2	2	2	2	2	2	2	2
48	2	2	2	1	1	1	2	2	4	2	1	1	1	1	2	2	2	2	2	2	1	1	2	1	1
45	1	2	2	2	1	3	2	2	3	3	2	2	2	2	2	2	3	4	2	3	2	2	2	1	2
33	1	2	3	3	2	2	3	2	2	2	4	4	3	4	3	2	2	2	2	2	1	1	1	1	1
50	1	2	3	3	2	2	1	1	2	3	2	1	1	1	1	2	1	2	2	2	2	1	3	1	1
54	1	2	3	2	3	3	2	2	3	3	2	2	2	2	2	3	2	3	3	2	2	2	3	2	2
47	2	2	1	1	1	2	1	1	1	1	1	1	1	1	1	1	1	1	1	1	1	1	2	1	3
25	1	2	1	2	1	2	2	1	1	2	2	1	2	2	2	1	1	1	1	1	1	1	3	1	1
45	1	2	2	3	2	1	3	3	3	2	3	3	3	2	3	2	2	2	2	2	2	1	3	2	2
48	1	2	2	2	2	2	2	2	2	3	2	2	2	2	2	3	3	3	3	3	2	2	2	2	2
54	1	2	1	2	2	2	2	1	3	2	2	3	2	2	2	2	2	2	2	2	1	1	2	1	1
23	2	2	3	2	3	2	2	1	2	3	1	1	1	1	1	2	3	2	2	3	2	2	2	1	1
45	1	2	2	2	2	2	2	2	1	1	3	3	2	2	3	2	2	2	2	2	3	3	4	3	3
38	1	2	1	1	1	1	1	1	2	2	1	2	1	1	1	1	1	1	1	1	1	2	1	1	1
48	2	2	1	2	1	1	1	1	1	2	1	1	1	1	1	1	1	1	1	1	1	1	2	1	2
27	2	2	1	2	2	2	2	2	2	1	1	1	1	1	1	2	1	2	2	1	2	2	3	3	2
49	2	2	2	2	2	2	2	2	2	2	2	2	2	2	2	2	2	2	2	2	2	2	2	2	2
35	2	2	2	2	2	4	2	2	4	4	2	2	2	2	2	2	2	2	2	2	2	2	2	2	2
49	2	2	1	1	1	1	1	2	2	1	1	2	1	2	2	2	2	2	2	2	2	2	2	2	2
49	1	2	1	1	1	1	1	1	1	1	1	1	1	1	1	1	1	1	1	1	1	1	1	1	1
44	1	2	1	2	3	2	3	2	2	3	2	1	1	1	1	3	3	3	3	2	1	1	3	1	1
33	2	2	3	2	3	2	3	3	2	4	2	3	2	2	2	2	3	2	2	2	2	2	3	2	2
33	1	2	3	3	3	3	3	3	3	3	3	3	3	3	3	3	3	3	3	3	3	3	3	3	3
52	2	2	1	1	1	1	1	1	1	1	1	1	1	1	1	1	1	1	1	1	1	1	1	1	1
47	2	2	1	1	1	1	1	1	1	1	1	1	1	1	1	1	1	1	1	1	1	1	1	1	1
57	1	2	1	1	2	1	2	2	2	1	1	1	1	1	1	2	1	2	2	2	1	1	2	1	2
50	2	2	2	1	2	2	1	3	2	2	1	1	1	1	1	1	1	1	1	1	1	1	2	1	1
32	1	2	3	2	4	3	3	2	3	4	3	4	4	3	3	2	2	2	2	2	1	1	3	1	1
42	2	2	2	2	2	2	3	3	2	2	2	2	2	2	2	2	2	2	2	2	2	2	2	2	2
33	1	2	4	3	4	4	3	3	4	2	4	4	3	3	4	3	4	4	3	3	5	4	5	3	4
31	1	2	2	2	2	3	3	2	3	4	1	1	2	1	1	2	2	2	2	2	3	3	4	2	4
38	1	2	1	3	1	2	2	3	2	3	1	2	1	2	1	1	1	2	2	1	1	1	1	1	1
53	1	2	1	1	1	1	1	1	2	1	1	1	1	1	1	1	1	1	1	1	1	1	1	1	1
47	2	2	1	2	1	2	1	1	1	1	2	2	1	1	1	1	1	2	1	2	1	2	2	1	2
43	2	2	1	2	2	2	2	2	2	2	1	2	1	2	1	2	2	2	2	2	2	2	2	1	2
25	2	2	2	2	2	2	2	3	2	4	2	3	2	2	2	2	3	3	2	3	1	1	2	1	1
51	2	2	3	3	3	2	3	3	2	4	4	2	4	4	4	2	2	2	2	2	3	4	4	3	4
53	1	2	2	2	2	2	3	3	2	2	2	2	3	2	3	2	2	2	2	2	3	3	3	2	3
35	1	2	2	2	1	2	3	1	2	2	1	1	1	1	1	2	2	3	2	2	1	1	1	2	1
46	1	2	2	1	2	1	1	1	2	3	1	1	1	1	1	2	1	1	1	2	1	1	1	1	1
37	1	2	1	1	2	1	2	1	2	1	2	2	1	2	1	2	1	1	2	1	1	1	2	1	2
51	2	2	1	2	1	1	1	1	2	2	1	1	1	1	1	2	2	2	2	2	1	1	1	1	1
52	2	2	2	2	2	1	2	2	2	3	1	1	1	1	1	1	1	1	1	2	1	1	3	1	1
27	1	2	2	2	2	2	3	2	2	2	1	2	1	1	1	2	2	3	2	2	2	2	2	2	2
46	1	2	4	4	4	4	3	3	5	4	3	3	4	3	4	3	3	3	3	3	3	4	4	3	2
45	1	2	2	2	2	2	2	2	2	2	2	2	2	1	2	2	2	2	2	2	3	2	2	2	2
41	2	2	4	3	3	1	3	3	2	4	4	2	4	4	3	2	2	2	2	2	2	2	2	2	2
49	1	2	3	2	3	3	1	1	3	3	1	1	1	1	1	2	1	1	2	1	1	1	1	1	1
45	1	2	1	3	2	2	1	2	1	2	2	1	2	1	1	2	2	2	2	2	1	1	2	1	1
37	2	2	3	2	3	3	2	1	2	4	2	1	1	1	3	3	2	3	2	2	2	2	4	3	2
33	1	2	2	2	2	3	2	2	3	2	2	4	2	4	2	2	2	2	2	2	2	2	2	2	2
51	2	2	2	2	3	2	2	2	3	2	2	2	2	2	2	2	2	2	2	2	2	2	2	2	2
24	2	2	2	2	2	2	2	2	3	2	2	2	1	2	2	3	3	2	2	2	2	2	3	2	2
54	2	2	2	2	1	2	1	1	3	2	1	1	1	1	1	3	2	2	3	2	1	1	2	1	1
36	1	2	2	1	2	2	2	1	2	1	2	1	1	2	2	2	1	2	2	2	1	1	2	1	1
41	2	2	2	2	2	2	3	2	2	2	2	2	2	2	2	3	2	3	2	3	2	2	3	2	2
53	1	2	2	2	2	3	2	2	2	3	3	3	3	4	4	1	1	2	1	1	1	1	1	1	1
66	1	2	2	2	2	3	2	2	3	2	1	2	1	1	1	1	2	3	1	2	3	2	3	1	2
42	2	2	1	2	2	2	2	2	2	2	2	1	2	1	1	1	1	1	1	1	1	1	1	1	1
54	1	2	4	3	4	4	3	3	3	4	3	4	3	3	3	3	3	3	3	3	2	3	3	2	2
31	1	2	4	3	5	4	4	3	4	5	3	5	2	2	3	3	3	1	3	1	3	5	4	2	2
48	1	2	4	4	4	1	2	1	4	4	2	4	2	4	5	4	4	4	4	4	2	3	4	1	3
36	2	2	2	1	1	2	1	2	1	3	2	3	1	1	1	2	2	3	2	3	2	1	3	1	1
48	1	2	2	2	2	2	2	2	2	2	2	2	2	2	2	2	2	2	2	2	2	2	2	2	2
54	2	2	2	2	3	3	3	3	3	3	3	2	2	2	3	2	2	2	2	2	2	3	2	2	1
45	1	2	2	2	2	2	2	2	3	2	1	3	1	1	1	2	2	2	2	2	2	2	2	1	2
52	2	2	2	2	2	1	2	1	2	2	1	2	1	1	2	2	2	2	2	2	1	2	3	1	2
41	2	2	3	2	2	2	3	2	2	3	3	1	2	2	3	3	2	3	3	2	1	1	2	1	1
24	1	2	1	1	1	1	2	1	1	1	2	4	2	1	2	1	1	1	1	2	1	1	1	1	1
37	2	2	3	2	2	3	2	2	2	3	2	2	2	2	2	1	1	1	1	2	1	2	2	1	1
48	1	2	2	1	1	1	1	1	1	2	1	1	1	1	1	2	2	1	1	2	1	1	1	1	1
53	1	2	2	2	3	2	3	2	2	3	1	2	1	1	2	1	2	2	2	2	1	1	3	2	1
59	1	2	3	3	2	3	2	2	3	2	2	3	2	2	2	2	2	2	2	3	2	2	3	2	2
53	1	2	1	2	1	1	2	1	1	1	1	2	1	1	1	1	2	2	2	2	1	1	1	1	1
49	2	2	4	3	4	3	3	3	3	4	3	3	3	3	4	2	3	3	3	3	3	3	4	4	4
41	2	2	3	2	2	3	3	2	2	3	2	2	2	1	1	2	3	2	2	3	3	2	3	2	3
56	1	2	1	1	1	1	1	1	1	3	1	1	1	1	1	1	1	1	1	1	1	1	1	1	1
50	1	2	3	2	2	2	1	1	2	3	1	1	1	1	2	2	1	2	1	1	1	1	1	1	1
38	1	2	2	1	2	3	2	2	3	3	1	2	2	2	2	2	2	2	2	2	1	1	2	1	2
24	1	2	1	1	1	1	1	1	2	1	1	1	1	2	1	2	2	3	3	1	1	1	2	1	1
28	1	2	3	2	2	3	2	3	2	3	2	2	2	1	1	2	2	2	2	2	1	1	2	1	1
34	1	2	2	2	2	2	2	2	2	2	1	1	2	2	2	2	2	1	2	1	1	2	3	1	2
26	2	2	2	3	1	2	3	3	2	2	3	2	2	3	2	2	2	2	2	2	1	1	3	1	2
28	2	2	1	2	2	2	2	2	2	2	2	1	1	2	2	2	2	2	2	1	1	1	2	1	1
27	2	2	2	2	2	2	1	2	2	2	1	2	1	1	2	2	2	1	2	2	1	1	1	1	1
30	2	2	2	1	1	1	2	1	4	1	1	1	1	1	1	1	1	1	2	1	1	1	1	1	1
27	1	2	2	2	3	3	3	2	2	3	2	2	1	1	2	3	2	2	2	2	2	2	2	2	2
27	2	2	2	2	3	1	3	2	2	3	2	3	1	2	1	2	2	1	2	1	1	1	3	1	1
28	1	2	3	3	2	3	3	4	2	3	3	2	3	3	4	3	3	3	3	2	1	1	3	2	2
30	2	2	3	1	2	2	2	1	2	3	1	2	1	1	1	1	1	2	1	2	1	1	2	1	1
23	2	2	1	1	1	2	2	1	1	1	2	1	1	2	1	1	2	2	2	1	1	1	1	1	1
27	1	2	2	3	2	2	3	2	3	2	1	1	1	1	3	2	2	2	2	3	1	1	1	1	1
29	2	2	2	2	2	2	4	3	2	3	3	2	3	2	2	2	2	3	3	2	1	1	2	1	1
31	2	2	1	1	2	2	1	2	3	2	2	1	1	2	2	3	1	2	3	1	1	1	3	1	2
27	2	2	2	1	2	2	1	1	2	3	1	1	1	1	2	2	2	3	2	3	1	1	3	1	1
25	1	2	2	2	1	1	2	3	1	1	3	2	2	3	4	2	2	2	3	2	1	1	1	1	1
26	2	2	1	1	1	1	1	1	1	1	1	1	1	1	1	2	2	2	2	1	1	1	1	1	1
33	2	2	1	2	2	1	2	1	3	1	1	1	1	1	1	2	2	2	2	2	1	1	1	1	1
29	1	2	2	2	1	1	2	1	1	2	1	1	1	1	2	2	2	2	2	2	1	2	2	1	1
22	2	2	2	3	2	3	3	3	3	3	2	3	2	2	3	3	2	2	3	2	1	1	1	1	1
28	2	2	1	1	1	1	1	2	2	2	1	1	1	1	1	2	2	2	3	1	1	1	1	1	1
[truncated: 979 more rows]
