# Supplementary material for: A Rasch analysis of the Burnout Assessment Tool (BAT)
Source: PLoS One. 2020 Nov 24;15(11):e0242241. doi: 10.1371/journal.pone.0242241 (PMC7685472; doi:10.1371/journal.pone.0242241)
Supplement: S2 Data — (XLSX) [file pone.0242241.s005.xlsx]

## Sheet: Sample 1 n=800
age	SEX	country	W_EX1	W_EX2	W_EX3	W_EX4	W_EX5	W_EX6	W_EX7	W_EX8	W_MD1	W_MD2	W_MD3	W_MD4	W_MD5	W_CC1	W_CC2	W_CC3	W_CC4	W_CC5	W_EC1	W_EC2	W_EC3	W_EC4	W_EC5
1	1	2	3	2	3	3	3	3	2	3	2	2	2	2	3	2	2	3	3	3	2	2	3	3	2
1	1	2	2	2	2	2	2	2	2	2	2	2	2	2	2	2	2	2	2	2	2	2	2	2	2
1	1	2	2	2	2	2	2	2	2	2	2	2	2	2	2	2	2	2	2	2	1	1	1	1	1
1	1	2	2	3	2	2	4	2	2	3	1	1	1	1	3	2	2	2	2	2	1	1	2	1	1
1	1	2	3	4	4	3	3	3	4	4	3	2	3	2	2	3	3	3	3	3	2	2	4	3	3
1	1	2	1	1	1	1	4	1	1	1	1	1	1	1	1	1	1	1	1	1	1	1	1	1	1
2	1	2	1	2	1	1	3	2	1	1	3	2	1	2	3	2	3	3	2	3	1	1	3	1	1
1	1	2	1	2	1	1	2	1	1	1	1	2	1	1	1	2	1	2	2	2	1	1	2	1	1
2	1	2	1	1	1	1	2	2	3	2	2	1	1	1	1	3	2	2	3	2	1	1	2	1	2
1	1	2	2	2	2	2	2	2	3	2	3	3	3	3	3	2	2	2	2	2	1	2	3	2	3
2	1	2	2	3	2	2	2	2	2	2	3	3	3	3	3	2	2	2	2	2	2	2	3	2	2
2	1	2	1	1	1	1	1	1	2	1	1	2	1	1	1	2	1	1	1	2	1	1	2	1	1
2	1	2	3	3	3	3	2	3	2	3	2	3	1	1	4	2	3	4	3	3	2	3	3	1	2
2	1	2	3	2	2	2	2	2	2	3	2	2	1	3	1	2	1	2	2	2	1	1	1	1	1
2	1	2	1	1	1	1	1	1	1	1	1	2	1	1	1	2	2	2	3	2	2	2	2	1	3
2	1	2	2	1	1	1	1	1	1	2	1	3	1	2	1	1	2	2	2	2	1	1	2	1	1
2	1	2	2	1	1	1	1	2	1	1	1	1	1	1	1	1	1	1	1	2	1	2	3	1	2
2	1	2	2	2	2	2	2	2	2	2	1	2	1	1	2	2	2	2	2	2	2	1	3	1	2
2	1	2	3	3	2	2	3	2	2	3	4	4	3	3	3	2	2	3	3	2	2	2	2	2	2
2	1	2	3	2	4	3	3	2	2	3	2	4	3	4	4	2	2	2	2	1	2	2	4	1	3
2	1	2	2	2	2	2	2	2	2	2	1	1	1	1	1	2	2	2	2	2	1	2	2	1	1
2	1	2	3	2	2	3	2	2	2	3	2	2	1	2	2	2	2	2	2	2	1	2	2	2	2
2	1	2	3	3	3	3	3	2	2	3	3	3	3	3	3	2	2	2	2	2	2	2	2	1	1
2	1	2	2	2	2	2	2	1	2	2	2	1	1	1	2	2	1	2	2	2	1	1	2	1	1
2	1	2	1	2	3	2	2	2	2	2	2	2	1	2	3	2	2	2	2	2	2	3	3	1	2
2	1	2	1	2	1	1	3	2	3	1	1	2	1	1	1	2	1	2	2	2	1	1	2	1	2
1	1	2	2	2	2	2	2	4	2	2	2	2	2	2	2	2	2	2	2	2	2	2	2	2	2
2	1	2	1	2	2	2	1	1	1	1	1	1	1	2	1	2	2	2	2	2	2	1	1	1	1
2	1	2	2	2	2	2	2	2	3	2	1	3	1	1	2	2	2	1	2	1	1	1	2	1	1
2	1	2	1	2	2	1	1	1	2	1	1	1	1	1	1	1	1	1	1	1	1	1	2	1	2
2	1	2	2	1	1	2	1	2	3	2	1	2	1	2	1	2	2	3	2	2	2	2	2	1	2
2	1	2	3	2	2	3	2	2	2	1	2	1	1	2	2	1	1	2	2	1	2	2	3	1	2
1	1	2	2	2	2	3	3	2	3	2	2	3	1	1	2	2	3	3	3	3	1	2	3	1	2
1	1	2	4	2	1	3	2	2	2	3	2	1	1	2	4	3	2	3	2	2	1	1	1	1	1
1	1	2	3	4	4	3	4	3	3	3	4	3	4	4	5	2	1	3	2	2	2	1	2	1	1
1	1	2	2	2	2	2	2	2	2	2	2	2	2	2	2	2	2	2	2	2	2	2	2	2	2
1	1	2	2	2	2	1	2	2	3	3	2	3	2	2	3	2	2	2	2	2	2	1	3	1	3
2	1	2	1	1	2	2	2	3	2	1	2	1	1	1	1	1	1	2	1	2	1	1	2	1	2
2	1	2	2	2	2	2	2	2	3	2	2	1	1	1	2	2	2	2	1	2	1	1	2	1	1
1	1	2	2	2	2	2	2	2	2	2	1	1	1	1	1	1	1	1	1	1	1	1	1	1	1
2	1	2	1	2	2	2	2	3	2	2	2	2	2	2	3	3	2	2	2	2	1	1	2	1	2
2	1	2	1	1	1	1	1	1	1	2	1	1	1	1	1	1	1	1	1	1	1	1	3	1	2
2	1	2	1	1	1	1	1	1	1	2	1	1	1	1	1	1	1	1	1	1	1	1	1	1	1
2	1	2	3	2	4	3	3	2	3	4	2	2	2	3	2	3	2	2	2	3	1	1	1	1	1
2	1	2	1	1	1	1	1	1	1	3	1	2	1	1	1	2	2	1	2	1	1	1	3	1	1
1	1	2	4	3	4	4	4	3	4	4	3	2	3	2	3	2	2	3	2	2	3	4	3	2	2
2	1	2	2	1	2	2	1	2	3	2	1	1	1	1	1	2	2	2	2	2	1	2	2	1	2
2	1	2	1	2	3	2	1	1	2	4	1	2	1	1	1	3	3	2	3	3	4	2	2	1	2
1	1	2	2	1	2	1	3	4	2	1	2	2	1	2	3	4	3	4	4	3	1	1	2	1	1
2	1	2	2	2	2	2	2	2	2	2	3	2	2	3	3	2	2	3	2	3	2	3	2	2	3
2	1	2	1	1	2	1	2	2	3	1	2	3	1	2	3	2	2	3	2	2	1	2	3	1	3
2	1	2	2	3	2	2	3	3	3	3	3	2	2	3	3	2	2	2	2	2	1	1	2	1	1
1	1	2	2	2	2	2	3	2	2	3	2	2	2	2	2	2	2	2	2	2	2	2	2	2	2
2	1	2	1	1	1	1	1	1	1	1	1	1	1	1	1	1	1	1	1	1	1	1	1	1	1
1	1	2	2	1	1	2	3	1	1	2	1	3	2	2	2	2	2	1	2	1	1	1	2	1	1
2	1	2	1	1	1	1	1	1	1	1	1	1	1	1	1	1	1	1	1	1	1	1	2	1	1
2	1	2	3	2	3	4	2	3	3	4	1	1	1	1	1	2	2	2	2	2	3	2	2	1	1
2	1	2	2	2	1	3	2	2	3	3	2	2	2	2	2	2	3	4	2	3	2	2	2	1	2
2	1	2	2	3	2	1	3	3	3	2	3	3	3	2	3	2	2	2	2	2	2	1	3	2	2
2	1	2	1	2	2	2	2	1	3	2	2	3	2	2	2	2	2	2	2	2	1	1	2	1	1
2	1	2	2	2	2	2	2	2	1	1	3	3	2	2	3	2	2	2	2	2	3	3	4	3	3
2	1	2	1	1	1	1	1	1	1	1	1	1	1	1	1	1	1	1	1	1	1	1	1	1	1
2	1	2	1	1	2	1	2	2	2	1	1	1	1	1	1	2	1	2	2	2	1	1	2	1	2
1	1	2	2	2	2	3	3	2	3	4	1	1	2	1	1	2	2	2	2	2	3	3	4	2	4
2	1	2	1	1	1	1	1	1	2	1	1	1	1	1	1	1	1	1	1	1	1	1	1	1	1
2	1	2	4	4	4	4	3	3	5	4	3	3	4	3	4	3	3	3	3	3	3	4	4	3	2
1	1	2	2	2	2	3	2	2	3	2	2	4	2	4	2	2	2	2	2	2	2	2	2	2	2
1	1	2	2	1	2	2	2	1	2	1	2	1	1	2	2	2	1	2	2	2	1	1	2	1	1
2	1	2	2	2	3	2	3	2	2	3	1	2	1	1	2	1	2	2	2	2	1	1	3	2	1
1	1	2	2	2	3	3	3	2	2	3	2	2	1	1	2	3	2	2	2	2	2	2	2	2	2
1	1	2	2	3	2	2	3	2	3	2	1	1	1	1	3	2	2	2	2	3	1	1	1	1	1
1	1	2	1	1	1	1	1	1	1	1	1	1	1	1	1	1	1	2	1	1	1	1	1	1	1
1	1	2	2	2	1	2	3	3	2	2	3	3	2	3	3	3	3	3	3	3	1	1	2	2	2
1	1	2	4	3	4	2	3	2	1	4	2	3	3	3	2	2	2	2	2	2	1	2	3	1	2
1	1	2	1	1	1	1	1	1	1	1	1	1	1	1	1	1	1	1	1	1	1	1	2	1	1
1	1	2	2	2	2	1	1	1	2	2	2	2	1	2	2	2	1	2	2	1	1	1	2	1	1
1	1	2	1	1	2	1	1	1	1	1	1	1	1	1	1	1	1	1	1	1	1	1	1	1	1
2	1	2	1	2	1	1	2	1	2	1	3	2	1	3	1	2	2	2	2	1	1	1	2	1	1
1	1	2	2	2	2	2	3	2	3	2	2	1	1	1	1	3	2	2	3	2	2	2	1	2	2
1	1	2	1	2	1	3	3	2	2	1	2	3	1	2	3	1	2	3	2	1	1	1	3	1	2
1	1	2	1	2	2	1	2	1	3	2	1	1	1	1	2	2	1	2	1	2	1	1	1	1	1
1	1	2	3	3	3	2	3	3	3	3	3	3	3	2	3	3	3	2	3	2	2	2	2	2	2
1	1	2	2	2	2	2	3	3	2	2	2	3	2	2	2	3	3	3	3	3	2	2	2	2	2
2	1	2	2	2	2	2	2	2	2	2	2	2	2	2	2	2	2	2	2	2	1	1	2	1	1
1	1	2	1	1	1	1	1	1	2	1	1	1	1	1	1	1	1	2	1	1	1	1	1	1	1
1	1	2	2	1	2	2	2	2	3	1	2	2	2	2	2	1	1	1	2	2	1	1	2	1	1
1	1	2	2	1	1	1	2	2	2	1	1	2	1	1	1	1	2	2	2	2	1	1	2	1	1
1	1	2	4	1	2	3	1	1	1	4	1	2	1	1	2	1	1	1	1	1	1	1	4	3	3
1	1	2	1	1	1	1	1	1	1	1	1	1	1	1	1	2	2	2	2	2	1	1	1	1	1
2	1	2	2	2	1	2	2	1	2	2	2	1	2	2	2	1	2	1	1	1	1	1	1	1	1
1	1	2	3	3	3	3	2	2	3	3	2	2	2	2	2	2	2	2	2	2	2	2	2	2	2
1	1	2	4	4	4	4	4	4	4	4	4	4	4	4	4	4	4	3	3	3	4	4	4	4	4
1	1	2	3	3	3	3	3	3	3	3	3	3	3	3	3	3	3	3	3	3	3	3	3	3	3
1	1	2	2	2	2	3	3	2	3	2	2	2	2	2	3	2	2	2	2	2	1	1	2	1	1
1	1	2	1	2	2	2	3	1	3	2	3	3	2	3	3	2	1	2	2	2	1	1	2	1	1
1	1	2	2	2	2	2	2	2	3	3	2	2	1	1	2	2	1	2	2	1	1	1	1	2	1
1	1	2	3	2	3	2	3	3	2	3	2	2	2	2	2	3	3	2	3	3	2	2	3	2	2
2	1	2	2	1	2	2	2	1	2	2	2	1	1	2	3	2	2	2	2	2	1	1	2	1	1
1	1	2	2	3	3	3	3	3	2	4	4	3	2	3	4	2	1	1	1	1	3	3	3	1	4
2	1	2	2	2	2	2	1	2	2	2	2	1	1	2	3	1	1	3	1	2	2	2	3	2	2
2	1	2	2	2	2	2	2	3	2	2	2	2	2	3	2	2	2	2	2	2	3	3	3	3	2
1	1	2	3	2	2	3	2	3	2	3	2	3	3	3	2	2	2	3	2	2	2	2	3	2	2
1	1	2	2	2	3	2	3	2	1	2	1	2	1	1	3	1	1	2	1	1	1	1	4	1	1
2	1	2	1	2	1	1	1	2	2	1	2	2	1	3	3	2	2	2	2	2	1	2	3	1	2
2	1	2	1	2	1	1	1	2	3	1	1	3	2	1	3	2	2	3	2	2	1	1	3	1	3
1	1	2	2	2	4	3	4	2	2	2	3	3	3	3	3	2	1	2	2	1	1	1	1	1	1
2	1	2	3	2	3	3	3	3	2	3	2	3	2	2	2	3	3	3	3	2	2	3	2	2	2
1	1	2	3	2	1	2	2	2	3	2	2	2	3	2	3	2	2	2	2	2	1	1	3	1	2
2	1	2	3	2	2	3	1	2	2	3	2	3	2	2	3	2	2	3	2	3	2	2	3	2	2
2	1	2	4	4	4	4	5	4	3	4	3	4	3	3	4	3	3	4	3	3	1	2	2	2	1
2	1	2	4	3	4	4	4	3	4	4	3	3	4	3	3	3	3	3	3	2	3	3	3	3	2
2	1	2	2	3	3	2	3	2	3	2	5	2	5	5	5	2	2	3	2	3	2	3	3	3	2
2	1	2	3	3	3	2	2	3	2	3	2	3	2	2	3	3	3	3	3	3	3	3	3	2	3
2	1	2	5	2	3	4	3	4	4	4	2	3	1	1	3	3	3	3	3	3	3	4	4	3	4
1	1	2	2	2	2	2	3	2	2	2	2	3	2	2	2	3	2	2	2	2	1	1	2	2	1
2	1	2	3	3	3	2	3	2	2	4	2	3	3	3	2	2	2	2	2	2	2	3	3	2	2
2	1	2	1	2	1	2	2	1	1	1	1	3	1	2	3	2	2	1	1	1	1	1	3	2	2
2	1	2	2	1	1	1	2	1	2	1	3	2	2	3	4	3	2	2	2	2	1	3	3	1	2
2	1	2	2	3	4	2	2	3	2	4	3	1	1	1	1	2	2	2	2	1	1	1	4	1	2
2	1	2	3	1	2	3	1	1	4	2	1	1	1	1	2	1	1	1	2	2	1	1	1	1	1
2	1	2	3	2	2	1	2	2	1	2	2	2	3	2	2	2	2	1	2	1	2	1	2	1	1
2	1	2	3	3	3	3	3	3	3	3	3	4	4	4	3	3	3	3	3	4	3	4	3	3	3
2	1	2	3	1	1	1	1	1	1	2	1	2	1	1	1	1	1	1	1	1	1	3	2	1	2
1	1	2	3	2	3	3	3	3	3	4	3	3	3	3	2	3	2	3	3	2	2	2	3	2	2
2	1	2	2	2	2	2	2	2	2	2	2	2	2	2	2	2	2	2	2	2	1	1	2	1	1
2	1	2	3	2	3	3	1	4	3	3	3	2	4	3	1	2	2	2	2	2	2	1	3	1	3
2	1	2	3	3	3	3	2	3	2	3	3	3	3	3	4	4	2	3	3	4	2	4	3	3	2
2	1	2	4	3	3	2	3	2	2	4	4	3	3	2	3	2	2	2	2	2	2	3	2	1	1
1	1	2	3	3	3	3	4	2	4	4	2	2	2	2	2	3	3	3	3	2	1	1	3	1	1
1	1	2	3	1	3	2	3	1	2	3	2	1	1	3	3	1	1	2	1	2	1	1	3	1	3
1	1	2	3	2	3	3	4	3	2	3	2	3	3	3	3	2	1	3	2	2	1	1	3	2	2
1	1	2	2	2	2	2	2	3	2	2	2	3	2	2	3	2	2	3	2	2	1	3	2	1	3
1	1	2	2	2	3	2	3	1	3	4	2	1	1	2	2	2	2	2	2	2	1	3	3	1	2
2	1	2	3	2	2	2	2	2	2	2	2	2	2	2	2	4	2	3	2	2	1	1	2	1	1
1	1	2	2	3	3	3	2	3	4	4	2	2	3	2	4	3	2	2	2	2	3	2	3	2	1
2	1	2	1	2	2	2	2	1	2	2	1	2	1	1	1	2	2	2	2	2	1	1	1	1	1
1	1	2	2	2	2	2	2	2	3	2	2	2	2	2	2	2	1	1	2	2	2	2	3	1	1
2	1	2	1	1	1	1	1	1	1	1	1	1	1	3	1	1	1	1	1	1	1	1	1	1	1
2	1	2	2	2	2	2	2	2	2	2	3	1	2	1	3	2	2	3	2	2	1	1	2	1	2
2	1	2	3	4	3	3	4	2	2	3	4	4	3	4	5	3	2	2	2	2	4	1	4	3	4
1	1	2	2	1	2	1	1	2	3	2	2	1	1	1	3	2	2	3	2	3	1	1	3	1	1
2	1	2	3	2	2	1	2	2	3	3	1	1	1	1	1	2	2	2	2	2	1	1	2	1	2
2	1	2	2	3	2	2	2	1	3	2	1	2	1	1	2	3	3	3	2	2	1	2	2	1	1
2	1	2	2	2	2	2	2	2	2	2	2	2	2	1	2	2	2	2	2	2	2	2	2	1	2
1	1	2	2	3	2	3	3	2	2	1	3	4	2	4	3	3	3	2	3	2	2	1	3	2	2
1	1	2	2	2	3	3	2	2	2	3	1	2	2	1	3	2	2	2	3	2	1	1	1	1	1
1	1	2	2	3	2	1	2	1	2	1	2	2	1	2	2	2	2	2	2	2	1	1	3	1	1
1	1	2	1	2	1	2	2	2	1	2	1	2	1	1	1	2	2	2	3	2	1	1	1	1	1
1	1	2	2	2	2	2	3	2	4	2	3	2	2	4	3	3	2	2	3	2	1	2	3	1	2
1	1	2	1	1	1	1	1	1	1	1	1	1	1	1	1	2	1	1	2	1	1	1	1	1	1
1	1	2	1	1	1	1	1	1	1	2	2	2	1	2	2	2	1	2	2	2	1	1	1	1	1
1	1	2	1	2	1	1	1	1	1	1	1	1	1	1	1	1	1	1	2	1	1	1	1	1	1
1	1	2	1	2	1	2	3	1	1	1	2	2	1	1	1	2	2	2	2	2	2	2	4	1	4
1	1	2	1	1	1	1	1	1	2	1	1	1	1	1	1	1	1	1	1	1	1	1	1	1	1
1	1	2	1	1	1	1	1	1	1	1	1	1	1	1	1	1	1	1	1	1	1	1	1	1	1
1	1	2	1	2	2	2	1	2	2	1	1	1	2	1	2	1	2	2	2	1	1	1	3	1	1
1	1	2	3	2	3	2	3	2	3	3	2	3	2	2	2	2	2	2	2	2	2	2	2	2	3
1	1	2	2	3	2	2	2	2	2	2	1	1	2	2	1	2	2	2	3	2	1	1	1	1	1
1	1	2	1	2	1	2	2	1	1	2	2	2	1	2	1	2	2	2	2	2	1	2	2	1	2
1	1	2	3	2	3	3	3	2	3	3	2	2	2	3	1	3	2	3	3	3	1	1	2	1	1
2	1	2	1	2	1	1	2	2	2	1	2	3	1	3	2	2	2	2	3	2	2	2	2	2	3
2	1	2	4	4	4	4	4	4	4	4	4	2	4	3	4	2	4	2	2	3	3	4	4	4	4
2	1	2	3	3	2	4	3	5	3	5	5	5	5	5	1	4	4	4	4	4	2	3	3	3	3
1	1	2	3	3	3	3	3	3	3	3	3	3	3	3	3	3	3	3	3	3	2	3	3	3	3
1	1	2	3	3	3	3	3	3	3	3	3	3	3	3	3	3	3	3	3	3	3	3	3	3	3
2	1	2	2	3	3	2	2	2	2	4	1	2	1	2	1	2	2	3	2	2	2	1	3	1	1
2	1	2	4	4	5	4	5	5	4	4	4	4	3	3	3	4	4	4	3	3	3	4	4	4	3
2	1	2	2	2	3	2	2	1	2	3	2	2	1	1	1	1	1	1	2	1	1	1	2	1	2
2	1	2	3	3	3	2	3	2	4	3	3	3	3	3	3	3	3	3	3	2	3	3	3	3	3
1	1	2	2	2	2	2	3	2	2	2	2	3	2	2	3	3	2	2	2	2	1	1	2	1	1
2	1	2	3	2	3	1	2	1	1	2	3	3	2	2	3	1	1	1	1	1	1	1	1	1	1
1	1	2	2	2	2	2	2	2	2	2	1	1	1	1	1	2	1	1	2	1	1	1	1	1	1
2	1	2	2	1	1	2	1	1	1	2	1	1	1	1	1	2	1	1	2	1	1	2	3	1	1
2	1	2	1	2	2	2	2	2	2	2	1	1	1	1	1	2	1	2	2	2	1	1	1	1	1
2	1	2	1	2	2	2	1	2	2	1	2	1	1	2	3	3	2	2	2	2	1	2	4	1	3
1	1	2	3	3	3	3	3	3	3	3	3	3	3	3	3	3	3	3	3	3	3	3	3	3	3
2	1	2	2	2	1	1	2	2	1	2	4	3	2	3	4	3	2	3	3	2	1	1	2	1	1
1	1	2	3	1	2	2	2	1	2	3	1	1	1	1	1	3	2	2	2	2	1	1	1	1	1
2	1	2	2	2	2	2	2	2	2	2	2	3	2	2	3	2	1	2	2	1	1	2	2	1	1
1	1	2	2	2	3	2	2	2	2	3	2	2	2	3	3	3	2	2	2	2	3	2	4	2	3
1	1	2	4	4	3	2	3	4	4	4	4	2	4	4	4	2	2	2	2	2	3	2	3	3	2
2	1	2	1	2	2	1	2	1	2	2	1	2	1	1	2	2	2	1	2	2	2	1	2	1	2
1	1	2	1	3	1	1	2	1	1	2	1	2	1	2	1	2	1	2	2	2	1	1	1	1	1
1	1	2	2	2	3	2	2	3	2	2	2	2	2	2	2	2	2	3	2	2	2	2	2	2	2
1	1	2	3	3	3	3	3	3	3	3	3	3	3	3	3	3	3	3	3	3	3	3	3	3	3
1	1	2	2	3	2	2	4	3	4	2	2	4	2	3	4	5	3	4	3	5	4	3	3	3	3
1	1	2	4	3	1	4	4	4	2	2	3	4	1	1	1	3	3	2	3	3	1	2	4	1	2
2	1	2	3	2	4	4	2	2	4	5	1	1	1	1	1	4	2	1	1	1	1	1	1	1	1
2	1	2	3	4	4	3	4	4	3	3	4	3	3	4	3	3	4	3	4	2	3	4	4	3	4
1	1	2	2	2	3	3	2	3	2	3	2	2	1	1	2	2	2	2	3	2	1	1	3	1	1
2	1	2	3	3	2	2	4	3	2	2	3	3	2	4	3	2	2	2	2	1	1	3	3	3	2
1	1	2	3	2	4	4	4	3	2	3	2	2	3	3	2	3	3	3	3	3	2	2	3	2	2
2	1	2	4	3	4	4	3	4	4	4	4	4	4	4	4	3	4	4	4	4	4	4	4	4	4
2	1	2	3	2	2	2	4	3	2	3	4	4	4	3	3	2	2	2	2	2	1	1	4	2	1
1	1	2	4	3	4	4	3	4	4	4	3	3	3	3	3	3	3	3	3	3	3	4	3	4	4
1	1	2	3	3	2	3	2	2	2	2	2	3	2	2	2	2	2	2	2	1	1	1	1	1	1
2	1	2	4	3	3	3	4	4	2	3	4	3	4	4	2	4	4	4	4	4	4	4	3	4	3
1	1	2	3	4	5	5	5	4	2	4	4	3	2	4	4	4	3	4	4	3	2	2	3	2	2
1	1	2	2	2	2	2	2	2	2	2	2	2	2	2	2	2	2	4	2	2	2	2	2	2	2
1	1	2	2	2	2	2	2	2	2	2	2	2	2	2	2	3	3	3	3	3	3	3	3	3	3
1	1	1	2	2	2	2	2	2	2	2	2	2	2	2	2	2	2	2	3	2	2	2	2	2	2
1	1	1	5	4	4	3	4	3	4	3	3	4	4	5	3	5	4	3	2	3	5	3	4	3	4
1	1	1	4	4	3	4	3	3	4	3	2	3	2	3	2	3	3	2	3	2	4	3	4	3	3
1	1	1	5	5	5	5	5	5	5	5	5	5	5	5	5	5	5	5	5	5	5	5	5	4	5
1	1	1	4	4	3	2	3	4	2	2	3	3	3	3	3	3	3	3	4	3	3	4	3	3	3
2	1	1	3	5	1	5	5	5	1	5	5	5	5	5	5	5	5	5	5	2	1	1	1	1	1
1	1	1	2	4	4	1	5	4	3	2	2	3	3	5	4	1	3	4	5	5	4	2	5	3	4
2	1	1	1	1	1	1	1	1	1	2	1	1	1	1	1	1	1	1	1	1	1	1	1	1	1
1	1	1	3	3	2	3	4	2	3	3	5	3	3	4	3	3	3	2	4	3	3	2	2	3	3
1	1	1	1	3	2	1	2	1	3	3	1	5	1	5	5	1	1	1	1	1	1	1	1	1	1
2	1	1	1	1	1	1	3	3	1	1	2	4	3	4	3	1	1	1	1	1	1	1	2	1	2
2	1	1	2	2	2	1	2	2	2	3	2	2	2	3	3	3	1	2	3	2	2	2	2	1	1
2	1	1	1	1	1	1	1	2	2	1	1	1	1	1	1	1	1	1	1	2	1	1	1	1	1
2	1	1	1	2	1	2	2	2	2	2	1	2	1	1	1	2	2	2	2	2	2	1	4	1	2
1	1	1	3	3	3	3	3	3	3	3	3	3	3	3	3	3	3	3	3	3	3	3	3	3	3
1	1	1	2	4	4	3	4	4	4	3	3	3	3	3	4	3	4	4	3	2	4	4	4	2	3
1	1	1	3	3	4	3	4	4	3	4	4	4	5	4	3	3	3	4	4	4	5	5	5	4	4
1	1	1	2	3	2	2	3	2	2	3	4	4	1	1	3	1	2	2	1	1	1	2	1	1	1
2	1	1	4	4	3	4	3	3	4	4	3	4	3	3	3	3	3	3	4	3	3	3	3	3	3
1	1	1	1	1	1	1	1	1	1	1	1	1	1	1	1	1	1	1	1	1	1	1	1	1	1
1	1	1	3	3	2	1	3	3	4	3	3	3	2	3	5	4	4	3	4	2	2	1	4	2	3
2	1	1	1	1	1	1	1	1	1	1	1	2	1	1	1	1	1	1	2	1	1	1	1	1	1
2	1	1	1	1	4	1	2	1	1	2	1	2	1	1	1	1	1	1	1	1	1	1	2	1	1
1	1	1	2	2	3	3	3	2	2	3	1	2	1	2	1	2	1	2	2	1	1	1	3	1	2
1	1	1	4	4	3	4	4	4	2	4	3	4	3	3	3	2	4	3	3	3	3	4	3	3	4
1	1	1	1	1	2	2	2	2	1	3	1	4	2	2	2	1	1	1	1	1	1	1	1	1	1
1	1	1	2	3	3	2	2	1	2	2	2	2	3	2	2	2	2	1	1	1	2	2	1	1	2
1	1	1	2	2	2	3	2	2	2	3	2	3	1	1	1	2	2	2	2	2	1	2	2	2	2
2	1	1	1	1	1	1	1	1	1	1	1	1	1	1	1	1	1	1	1	1	1	1	1	1	1
1	1	1	2	2	3	2	3	3	2	2	3	2	2	3	3	2	3	3	2	2	2	3	3	3	2
2	1	1	1	1	1	1	1	1	1	2	1	1	1	1	1	1	1	1	1	1	1	1	1	1	1
2	1	1	1	3	3	2	1	2	2	3	1	2	1	3	1	1	1	1	2	2	1	1	1	1	1
2	1	1	5	5	5	5	5	4	5	5	5	5	5	5	4	5	4	4	4	5	2	3	4	3	2
2	1	1	3	2	2	2	1	2	3	3	1	2	1	1	1	2	2	2	2	2	2	1	2	1	1
1	1	1	2	1	2	2	2	1	3	2	3	3	2	3	2	3	2	2	2	2	1	1	1	1	1
2	1	1	3	2	2	1	2	2	3	3	1	3	1	1	2	1	2	2	2	2	1	2	2	1	2
2	1	1	3	3	3	3	3	3	3	3	3	3	3	3	3	3	3	3	3	3	3	3	3	3	3
2	1	1	1	3	1	2	2	3	2	2	3	2	2	2	2	3	2	3	3	2	1	1	2	1	2
2	1	1	2	2	3	2	2	2	3	3	1	1	1	1	3	2	2	2	3	3	1	1	2	1	2
2	1	1	4	4	4	4	4	4	4	4	4	4	4	4	4	4	4	4	4	4	4	4	4	4	4
2	1	1	1	1	1	1	1	1	1	1	1	1	1	1	1	1	1	1	1	1	1	1	1	1	1
2	1	1	3	2	2	2	3	3	2	2	2	3	2	2	4	2	2	2	2	2	1	1	2	1	1
2	1	1	1	1	1	1	1	1	3	1	1	2	1	1	1	1	1	1	1	1	1	1	2	1	1
1	1	1	3	3	3	3	3	3	3	3	3	3	3	3	3	3	3	3	3	3	3	3	3	3	3
2	1	1	2	2	2	2	2	3	2	3	2	4	2	2	3	2	2	2	2	2	1	1	1	1	1
1	1	1	2	2	2	2	2	2	2	2	2	2	2	2	3	2	2	1	2	2	2	2	3	2	2
2	1	1	1	1	1	1	1	1	2	2	1	1	1	2	2	1	1	1	1	1	1	1	1	1	1
2	1	1	2	2	2	1	2	1	2	3	2	2	2	2	2	4	2	1	2	2	1	1	2	1	1
1	1	1	5	2	3	4	2	2	3	4	4	4	5	4	3	3	4	3	3	4	4	4	5	5	3
2	1	1	1	2	2	2	1	1	2	3	1	1	1	1	1	1	1	1	1	2	1	1	2	1	2
1	1	1	1	1	1	1	1	1	1	1	1	1	1	1	1	1	1	1	1	1	1	1	1	1	1
2	1	1	2	1	3	2	2	1	2	2	2	2	1	1	2	2	2	1	1	2	2	1	2	2	2
1	1	1	3	3	3	3	3	3	3	3	3	3	3	3	3	3	3	3	3	3	3	3	3	3	3
2	1	1	3	3	3	3	3	3	3	3	3	3	3	3	3	3	3	3	3	3	3	3	3	3	3
2	1	1	2	1	2	2	1	3	3	3	1	1	1	1	2	3	2	3	3	2	1	1	1	1	1
1	1	1	3	1	1	2	2	1	1	2	2	4	2	2	2	2	1	1	2	2	3	3	2	3	3
2	1	1	1	1	2	1	1	1	2	1	2	4	2	2	1	1	1	1	1	2	1	1	2	1	1
2	1	1	2	1	1	1	1	1	1	2	1	1	2	1	2	1	2	1	1	1	1	1	2	1	1
2	1	1	1	1	1	1	1	1	1	1	1	1	1	1	1	1	1	1	1	2	1	1	3	1	1
1	1	1	3	4	3	4	3	3	4	3	4	3	4	4	4	3	4	3	4	3	3	3	4	3	3
2	1	1	1	2	2	2	2	1	2	2	3	3	1	1	2	2	2	2	2	2	2	2	2	2	2
1	1	1	3	1	1	4	1	1	1	5	1	5	3	1	3	1	1	1	1	1	1	1	1	1	1
2	1	1	2	1	1	2	1	1	1	1	1	1	1	1	1	1	1	1	1	1	1	1	1	1	1
1	1	1	1	3	2	2	4	3	4	3	3	3	2	3	4	3	1	2	2	2	2	3	3	4	3
2	1	1	2	1	1	1	1	1	1	1	1	1	1	1	1	1	1	1	1	1	1	1	1	1	1
2	1	1	4	4	3	4	3	4	2	3	3	1	3	3	3	2	2	2	2	2	3	3	4	2	2
1	1	1	1	3	1	3	2	2	2	4	3	2	3	4	2	1	2	3	2	3	1	4	3	3	2
2	1	1	2	2	2	2	2	2	2	2	2	2	2	2	2	2	2	2	2	2	2	2	2	2	2
2	1	1	2	2	2	2	2	2	2	2	2	2	2	2	2	2	2	2	2	2	2	2	2	1	2
1	1	1	2	2	2	3	3	3	1	1	4	3	3	4	4	3	2	3	2	2	1	2	2	1	3
2	1	1	2	2	2	2	2	2	2	2	2	2	2	2	2	2	2	2	2	2	2	2	2	2	2
1	1	1	2	2	2	2	2	2	2	2	2	2	1	2	2	2	2	2	2	2	2	2	2	2	2
2	1	1	3	3	4	3	4	4	4	4	3	3	3	3	3	3	3	3	3	3	3	3	3	3	3
1	1	1	2	2	2	2	4	3	2	2	2	2	3	1	3	3	3	2	3	2	2	2	3	2	2
1	1	1	3	3	2	3	3	2	4	3	3	4	2	3	3	2	2	3	2	3	2	1	3	1	1
1	1	1	3	4	3	4	3	3	3	4	4	4	4	4	4	2	3	3	3	2	3	3	3	3	3
2	1	1	2	1	2	2	1	1	1	1	1	1	1	1	1	1	1	1	1	1	1	1	1	1	1
1	1	1	2	2	2	2	2	2	2	2	2	2	1	2	2	2	2	2	2	2	2	2	2	1	2
2	1	1	2	2	2	2	2	2	2	2	2	2	2	2	2	2	2	2	2	2	2	2	2	2	2
2	1	1	2	2	2	2	2	2	3	3	1	1	1	1	2	2	1	1	2	1	2	1	2	1	1
2	1	1	2	2	2	2	2	2	2	2	2	2	2	2	2	2	2	2	2	2	2	2	2	2	2
1	1	1	2	2	2	2	3	3	3	3	2	3	2	3	3	4	3	3	3	3	3	3	3	2	2
2	1	1	1	1	1	1	1	1	1	2	1	1	1	1	1	1	1	1	1	1	1	1	1	1	1
2	1	1	2	2	3	2	5	3	3	3	1	2	2	1	1	2	2	1	2	2	1	1	2	1	1
1	1	1	1	1	1	1	2	1	1	1	1	1	1	1	1	1	1	1	1	1	1	1	1	1	1
1	1	1	2	3	4	3	3	4	3	4	3	3	2	4	3	2	3	3	4	3	2	3	3	3	3
2	1	1	3	2	3	2	3	2	2	3	2	2	1	2	2	2	2	2	2	2	1	1	3	1	1
2	1	1	1	1	1	1	1	1	1	1	1	1	1	1	1	1	1	1	1	1	1	1	1	1	1
2	1	1	1	2	2	2	1	1	1	1	1	2	1	2	2	1	2	2	2	2	1	1	2	1	2
2	1	1	1	1	1	1	1	1	1	1	1	1	1	1	1	1	1	1	1	1	1	1	1	1	1
1	1	1	4	2	3	2	3	2	5	4	1	3	2	1	1	4	3	3	2	3	3	5	3	4	4
2	1	1	1	1	1	2	1	1	2	2	1	2	1	1	3	1	1	1	2	1	4	2	2	1	1
1	1	1	2	2	4	4	3	4	3	3	3	5	4	3	5	3	2	2	4	4	4	5	5	3	1
1	1	1	2	2	2	2	2	2	2	2	2	2	2	2	2	2	2	2	2	2	2	2	2	2	2
1	1	1	2	2	1	2	1	1	3	3	2	4	3	3	1	1	1	1	1	1	1	1	1	1	2
1	1	1	1	2	5	2	5	1	3	1	1	1	2	1	1	1	1	2	3	1	1	1	1	1	1
1	1	1	2	2	2	2	2	2	2	2	3	3	4	2	4	2	3	2	2	3	2	2	2	3	2
1	1	1	4	4	4	4	4	3	3	4	3	4	4	4	4	3	4	3	3	4	4	4	3	4	4
2	1	1	3	4	3	2	3	3	3	3	3	3	3	3	3	2	3	2	3	3	2	2	3	3	3
1	1	1	4	2	3	3	3	4	3	4	4	3	4	4	4	3	2	3	2	3	2	2	1	1	2
1	1	1	3	3	3	3	4	3	2	3	3	2	3	3	3	3	3	2	3	3	3	3	3	3	3
1	1	1	4	4	3	3	4	4	3	3	4	3	2	4	4	4	5	4	4	3	3	4	4	4	5
2	1	1	2	1	2	2	3	2	2	2	2	2	2	2	2	1	1	1	1	1	1	1	1	1	1
2	1	1	3	3	3	3	3	3	4	4	4	3	3	3	3	3	3	3	3	3	3	3	3	3	3
2	1	1	2	2	2	1	2	2	2	3	2	3	2	3	2	3	3	2	3	2	2	2	2	1	2
1	1	1	2	2	4	3	4	3	3	2	2	5	3	4	4	3	3	2	5	4	2	3	4	2	3
2	1	1	3	3	3	3	3	3	3	3	3	3	3	3	3	3	3	3	3	3	3	3	3	3	3
1	1	1	3	3	3	3	3	3	3	3	3	3	3	3	3	3	3	3	3	3	3	3	3	3	3
1	1	1	2	2	2	1	2	2	2	3	3	4	2	2	1	4	2	3	3	2	1	2	1	1	1
1	1	1	2	2	2	3	2	2	2	3	2	3	1	2	2	2	3	2	2	2	2	2	3	2	3
2	1	1	2	2	2	2	2	2	2	2	1	1	1	1	1	2	2	2	2	2	2	1	2	1	1
2	1	1	1	2	1	1	2	1	1	1	2	1	2	2	1	1	1	1	2	2	1	1	1	1	1
2	1	1	2	2	2	2	3	3	2	2	2	2	3	3	2	3	2	3	3	2	3	4	3	2	2
1	1	1	2	1	1	1	2	1	1	2	1	2	1	1	1	2	1	1	2	1	1	1	1	1	1
2	1	1	2	2	1	3	1	2	3	3	3	2	1	3	3	2	1	1	2	2	1	1	2	1	1
1	1	1	5	2	4	2	4	5	2	5	4	4	2	4	4	3	3	2	3	2	1	1	3	1	1
2	1	1	3	2	3	4	3	4	4	2	3	3	3	3	3	3	3	3	3	3	2	2	2	2	2
1	1	1	1	2	3	2	3	2	3	2	2	3	2	2	3	3	2	3	3	3	2	1	1	2	1
1	1	1	2	2	2	2	2	2	2	2	2	2	2	2	2	2	2	2	3	2	1	1	3	1	1
1	1	1	3	3	3	3	2	4	2	2	2	2	2	3	2	3	2	3	2	1	2	2	3	2	3
1	1	1	3	3	3	3	3	3	3	3	3	3	3	3	3	3	3	3	3	3	3	3	3	3	3
1	1	1	3	3	3	2	4	4	3	2	4	4	3	3	3	2	3	3	3	3	3	3	4	3	3
1	1	1	3	3	2	2	3	3	3	3	2	2	3	2	2	2	2	3	3	3	3	3	2	2	3
2	1	1	3	3	3	3	3	3	3	3	3	3	3	3	3	3	3	3	3	3	3	3	3	3	3
1	1	1	2	2	2	2	2	2	2	2	1	1	2	1	1	1	1	1	1	1	1	1	1	1	1
1	1	1	4	4	3	4	4	4	3	3	3	4	4	4	3	4	3	4	4	3	3	4	3	4	3
1	1	1	2	1	1	1	2	1	1	2	4	4	2	4	4	2	3	4	3	2	1	2	4	1	1
2	1	1	2	3	2	2	2	2	2	2	2	3	1	2	3	2	1	2	2	1	2	2	2	1	2
1	1	1	2	3	3	4	3	2	3	4	5	3	4	4	3	4	2	3	3	3	3	2	3	2	4
1	1	1	4	4	4	3	5	4	3	4	3	4	3	4	4	4	3	4	4	3	4	4	5	4	3
2	1	1	2	2	2	2	2	2	2	3	1	1	1	1	1	1	2	1	2	1	1	1	1	1	2
2	1	1	1	1	1	1	1	1	1	2	1	1	1	1	1	1	1	1	1	2	1	1	2	1	2
1	1	1	1	1	1	1	1	1	1	1	1	1	1	1	1	1	1	1	1	1	1	1	1	1	1
2	1	1	3	3	3	3	3	3	3	3	2	2	2	2	2	2	2	2	2	2	2	2	2	2	2
1	1	1	3	3	1	2	5	4	2	4	4	2	1	3	5	1	3	1	2	2	4	3	2	4	3
2	1	1	1	2	1	1	1	1	1	1	1	5	1	1	3	1	1	1	2	1	1	1	1	1	1
2	1	1	3	2	3	2	3	3	3	3	2	2	2	1	2	1	1	1	1	2	2	2	2	2	2
1	1	1	3	3	3	4	4	3	4	4	4	4	4	3	3	4	4	4	3	3	3	3	3	3	3
2	1	1	3	3	3	3	3	3	3	3	3	3	3	3	3	3	3	3	3	3	3	3	3	3	3
1	1	1	1	2	2	2	2	1	1	2	2	3	2	2	2	2	2	2	2	2	1	1	2	1	1
1	1	1	4	3	2	4	4	3	4	2	4	4	4	3	4	4	2	3	2	5	3	2	4	3	4
1	1	1	2	2	3	3	3	3	4	2	1	2	3	2	3	2	2	3	3	2	2	3	3	3	4
2	1	1	2	2	1	1	2	1	1	3	2	1	2	2	2	1	2	2	2	1	2	2	3	1	3
1	1	1	3	2	3	3	2	3	3	4	4	4	2	3	3	2	4	1	3	3	3	2	4	3	1
1	1	1	3	3	4	2	3	3	2	2	4	3	3	2	2	2	3	3	3	3	2	2	3	2	3
2	1	1	1	2	1	2	2	1	1	3	1	2	1	2	1	2	1	1	2	2	1	1	1	1	1
2	1	1	3	2	2	2	2	3	2	3	2	1	3	2	2	2	2	2	2	2	3	2	3	3	3
1	1	1	2	2	2	2	2	2	2	2	2	3	2	2	2	3	2	3	3	2	3	3	3	2	3
2	1	1	3	3	3	3	3	3	3	3	3	3	3	3	3	3	3	3	3	3	3	3	3	3	3
1	1	1	3	4	4	4	4	3	3	4	4	3	4	3	4	4	3	3	4	3	3	4	3	4	3
1	1	1	5	5	3	4	4	5	4	4	5	4	4	5	4	5	5	5	4	5	4	5	3	5	4
2	1	1	2	3	3	4	4	3	1	4	3	3	3	3	3	3	3	2	3	2	1	1	1	1	1
2	1	1	3	3	4	3	3	3	3	3	3	3	2	3	3	3	3	3	3	3	2	3	3	2	3
1	1	1	3	4	5	4	4	5	5	5	3	4	4	4	5	4	4	4	4	4	4	4	4	4	4
2	1	1	2	2	1	1	2	1	1	2	1	2	1	1	1	2	1	1	2	1	1	1	1	1	1
1	1	1	3	4	3	2	3	3	3	4	3	3	4	4	2	3	3	3	2	4	2	3	4	3	4
1	1	1	4	2	4	3	2	5	2	4	5	3	4	3	3	3	5	4	4	2	3	4	4	5	4
1	1	1	4	3	3	4	4	4	4	4	3	3	4	4	4	3	4	3	4	3	3	3	4	4	4
1	1	1	3	3	3	2	3	3	3	2	4	3	2	3	3	3	2	3	2	4	3	2	4	3	3
1	1	1	3	4	3	4	3	3	4	4	4	4	4	3	3	2	1	2	2	1	1	3	2	2	2
2	1	1	2	2	3	3	3	3	2	4	2	2	2	3	2	2	2	2	2	2	2	3	3	3	2
1	1	1	2	2	3	4	2	3	4	3	4	3	3	3	3	3	3	4	4	3	4	2	2	2	5
2	1	1	2	2	3	2	2	3	3	4	2	2	2	2	2	2	2	2	2	2	3	3	3	3	4
2	1	1	2	2	1	2	3	3	1	1	2	1	1	1	1	3	3	4	3	2	1	1	3	1	2
1	1	1	2	2	2	2	2	2	2	3	2	2	1	2	2	2	2	2	2	2	2	2	2	2	2
1	1	1	2	2	2	2	2	2	2	2	2	2	2	2	2	2	2	2	2	2	2	2	2	2	2
1	1	1	3	3	3	3	3	3	3	3	3	3	3	3	3	5	5	5	2	5	4	4	3	5	4
1	1	1	3	2	2	2	2	1	3	2	1	2	1	1	1	1	2	1	2	1	1	1	1	1	1
1	1	1	3	3	3	3	3	3	3	3	3	3	3	3	3	3	3	3	3	3	3	3	3	3	3
2	1	1	3	3	4	3	3	2	2	4	3	3	3	2	4	4	3	4	4	3	4	4	4	4	4
2	1	1	3	3	1	1	3	3	3	2	3	2	3	3	3	3	2	2	3	2	1	1	3	1	1
2	1	1	1	1	1	1	1	2	3	1	1	1	1	1	1	1	1	1	2	1	1	1	2	1	1
1	1	1	4	4	4	4	4	4	4	4	4	4	4	4	4	4	4	4	4	4	4	4	4	4	4
2	1	1	1	1	2	1	2	4	2	2	1	2	1	1	1	1	1	2	1	1	1	1	1	1	1
2	1	1	2	1	2	1	1	1	1	2	1	2	1	1	2	2	2	1	2	2	1	1	2	1	2
2	1	1	3	3	3	4	5	1	1	1	3	4	4	3	3	1	1	1	1	1	3	3	4	3	3
2	1	1	3	2	2	2	3	2	1	3	2	2	2	1	2	3	3	2	3	2	2	1	2	2	3
1	1	1	4	3	3	4	4	3	4	4	4	4	4	4	3	4	4	4	3	4	3	4	3	3	3
2	1	1	2	2	2	2	3	2	3	2	2	2	2	2	1	1	1	1	2	2	1	1	2	1	1
1	1	1	2	2	5	3	4	2	3	3	2	3	4	5	2	1	3	2	2	4	2	3	4	3	2
1	1	1	3	2	4	4	4	2	3	4	4	2	3	4	4	4	3	3	2	3	4	4	3	3	2
1	1	1	2	5	3	5	5	2	2	3	2	4	1	1	1	2	3	3	3	3	3	2	3	3	2
1	1	1	3	3	3	3	3	3	3	3	3	3	3	3	3	3	3	3	3	3	3	3	3	3	3
1	1	1	3	3	3	3	2	4	3	2	3	4	4	3	2	2	3	4	3	3	3	2	3	3	4
1	1	1	4	5	2	2	3	2	5	4	2	3	4	3	3	3	4	4	5	5	2	5	3	3	3
2	1	1	2	1	1	2	1	1	1	2	1	3	1	2	2	1	2	2	1	2	2	1	2	1	2
2	1	1	2	2	3	1	1	1	1	2	1	4	1	1	1	1	1	1	1	1	1	1	1	1	1
1	1	1	3	4	3	4	4	3	5	4	3	4	3	2	3	3	5	2	3	4	2	3	4	3	4
1	1	1	2	2	2	2	2	2	2	2	2	2	2	2	2	2	3	2	2	2	2	2	2	3	2
2	1	1	2	2	2	2	2	2	2	2	2	3	2	2	2	1	1	1	1	1	1	1	1	1	1
2	1	1	5	3	5	1	5	5	3	5	5	5	5	1	5	3	3	1	3	3	5	3	3	3	5
1	1	1	3	3	3	3	3	3	3	3	3	3	3	3	3	3	3	3	3	3	3	3	3	3	3
2	1	1	5	3	4	5	4	4	5	4	4	5	4	3	4	4	5	5	5	4	4	4	3	5	5
1	1	1	3	4	4	4	4	4	3	4	3	3	4	1	3	3	3	3	3	3	3	3	3	3	3
2	1	1	3	2	3	1	2	2	3	3	1	1	1	1	3	2	2	3	2	2	2	1	2	1	3
2	1	1	3	2	3	2	2	2	4	3	2	2	2	1	2	3	3	1	3	2	2	4	3	2	3
2	1	1	4	3	3	2	3	3	3	4	1	4	3	2	2	3	3	3	3	3	1	2	2	2	2
2	1	1	4	5	5	4	4	3	4	4	3	2	3	4	3	4	3	4	1	2	2	4	4	3	3
2	1	1	4	4	4	4	4	4	4	4	4	4	4	4	4	4	4	4	4	4	3	4	4	4	4
2	1	1	1	1	1	1	1	1	1	1	1	1	1	1	1	1	1	1	1	1	1	1	1	1	1
1	2	1	2	2	4	2	4	3	3	4	4	3	3	2	2	4	1	2	2	3	4	3	2	3	2
2	2	1	2	2	2	4	4	2	3	4	2	3	1	2	3	2	1	3	2	2	1	2	2	2	1
1	2	1	3	3	3	3	3	3	3	3	3	3	3	3	3	3	3	3	3	3	3	3	3	3	3
2	2	1	4	4	4	4	4	4	4	4	4	4	3	3	3	3	3	3	4	3	3	4	4	4	4
1	2	1	3	3	3	3	3	3	3	3	3	3	3	3	3	3	3	3	3	3	3	3	3	3	3
1	2	1	5	5	1	5	5	3	5	5	4	5	4	3	4	4	3	1	3	3	3	1	4	3	1
2	2	1	1	2	1	3	2	3	3	2	1	1	1	1	1	1	1	1	1	1	1	1	2	1	1
1	2	1	3	3	3	3	3	3	3	3	3	3	3	3	3	3	3	3	3	3	3	3	3	3	3
1	2	1	2	2	2	3	2	2	4	2	3	1	1	2	2	2	2	1	2	2	1	1	2	1	1
1	2	1	4	4	4	4	4	4	4	4	4	4	4	4	4	4	3	4	4	2	3	3	3	3	3
2	2	1	5	4	4	5	5	5	5	5	4	3	3	3	3	4	3	3	4	2	3	3	3	2	3
2	2	1	1	1	1	1	1	1	2	1	1	4	1	2	1	2	2	2	2	2	1	1	2	1	1
2	2	1	1	2	1	1	1	1	1	2	1	1	1	2	1	1	1	1	1	2	1	1	1	1	1
2	2	1	1	1	1	1	1	1	1	1	1	1	1	1	1	1	1	1	1	1	1	1	1	1	1
2	2	1	1	1	1	1	1	2	1	1	1	1	1	1	1	1	1	1	1	1	1	1	1	1	1
2	2	1	1	1	1	1	1	1	1	1	1	1	1	1	1	1	1	1	1	1	1	1	1	1	1
2	2	1	1	1	1	1	1	1	1	1	1	1	1	1	1	1	1	1	1	1	1	1	1	1	1
2	2	1	1	1	3	2	1	1	1	1	3	3	1	1	1	1	1	1	1	1	1	1	1	1	1
1	2	1	1	1	1	1	1	1	1	1	1	1	1	1	2	2	2	2	2	2	1	1	3	1	2
1	2	1	3	3	3	3	3	3	3	3	2	2	2	2	2	2	2	2	2	2	2	2	3	2	2
2	2	1	1	1	1	1	1	1	1	1	1	1	1	1	1	1	1	1	1	1	1	1	1	1	1
2	2	1	1	2	3	3	3	2	3	3	1	3	1	1	1	1	1	1	1	1	1	1	1	1	1
2	2	1	1	1	1	2	3	3	1	2	2	4	2	3	3	2	2	2	2	2	2	2	4	2	2
1	2	1	1	1	1	1	1	1	1	1	1	1	1	1	1	1	1	1	1	1	1	1	1	1	1
2	2	1	1	2	1	2	1	1	1	1	1	1	1	1	1	1	1	1	1	1	1	1	1	1	1
2	2	1	2	2	2	2	2	2	3	2	2	2	2	2	2	4	2	2	2	2	2	2	2	2	2
2	2	1	3	3	3	3	3	3	3	3	3	3	3	3	3	3	3	3	3	3	3	3	3	3	3
1	2	1	3	3	2	3	4	1	2	5	3	4	2	2	4	2	3	1	4	1	3	1	2	2	2
1	2	1	2	2	1	1	1	2	2	1	1	1	1	1	1	1	1	2	1	1	1	1	1	1	1
2	2	1	3	2	2	3	2	2	2	2	3	4	3	3	2	2	2	2	2	2	2	2	2	2	2
2	2	1	2	2	4	2	5	2	2	3	1	1	2	1	4	1	2	2	1	1	3	2	4	2	3
2	2	1	3	3	3	3	3	3	3	3	3	3	3	3	3	3	3	3	3	3	3	3	3	3	3
2	2	1	1	2	1	2	1	1	2	1	1	5	3	3	1	5	1	1	1	1	1	3	2	2	2
1	2	1	2	4	3	3	3	3	3	3	4	3	3	3	3	3	2	3	3	3	3	3	3	3	3
2	2	1	1	1	1	1	1	1	1	3	1	1	1	1	1	1	1	1	1	1	1	1	1	1	1
2	2	1	3	3	3	3	2	3	3	3	2	2	2	2	2	2	2	2	2	2	2	2	2	2	2
2	2	1	2	1	2	1	2	1	1	2	1	1	1	1	2	2	2	2	2	1	1	1	1	1	1
1	2	1	3	3	2	1	2	3	2	1	4	2	3	2	3	3	1	3	2	2	4	3	3	3	2
1	2	1	2	2	2	2	2	2	3	2	2	2	2	2	2	2	2	2	2	3	2	2	2	2	2
2	2	1	2	1	1	1	1	1	1	1	1	2	1	2	1	1	2	2	2	2	2	2	2	1	2
1	2	1	4	3	3	4	4	4	3	5	3	4	5	4	2	3	3	3	3	3	1	3	2	2	1
2	2	1	2	1	1	1	2	2	2	2	1	3	1	1	2	2	2	2	2	2	1	1	2	1	1
2	2	1	3	3	3	3	2	2	2	2	1	2	1	2	3	2	3	3	2	2	2	2	3	2	2
2	2	1	2	3	2	1	3	1	3	1	1	1	1	1	1	3	2	3	2	2	2	1	2	1	1
2	2	1	1	1	1	1	1	1	1	1	1	1	1	1	1	1	1	1	1	1	1	1	1	1	1
1	2	1	1	1	2	2	3	1	1	2	1	1	1	1	1	2	1	1	2	1	1	1	2	1	1
1	2	1	2	3	2	2	2	2	2	2	2	2	2	2	2	2	2	2	2	2	2	2	2	2	2
2	2	1	1	1	1	1	1	1	3	2	1	1	1	1	1	1	1	1	1	1	1	1	1	1	1
2	2	1	2	1	1	2	1	1	1	1	1	1	1	1	1	1	1	1	1	1	1	1	1	1	1
2	2	1	1	1	3	3	3	2	1	3	1	2	1	1	1	1	1	1	1	1	1	1	2	2	1
2	2	1	2	1	3	3	3	4	3	4	5	2	1	1	1	2	1	1	1	1	1	1	1	1	1
2	2	1	1	1	1	1	1	1	1	1	1	1	1	1	1	1	1	1	1	2	1	1	2	1	1
2	2	1	2	2	2	3	2	1	3	3	2	2	1	1	2	2	1	1	2	2	1	1	2	1	1
2	2	1	2	1	1	2	2	2	2	2	1	2	1	1	2	1	1	2	2	2	1	2	1	1	2
2	2	1	1	2	3	2	3	1	1	1	2	2	3	1	2	2	2	2	2	2	1	1	2	1	1
2	2	1	2	2	1	2	2	2	3	3	1	1	1	2	1	2	2	2	2	1	5	3	3	1	2
2	2	1	3	3	3	3	3	3	3	3	3	3	2	3	3	2	2	2	3	1	1	1	1	1	1
2	2	1	1	1	2	1	1	1	1	2	1	1	1	1	1	1	1	1	1	2	1	1	1	1	1
1	2	1	2	2	3	2	3	1	2	2	1	1	1	1	1	1	1	1	2	2	1	1	3	1	1
1	2	1	1	1	1	2	2	1	2	2	1	1	1	1	1	1	1	1	1	1	1	1	1	1	1
1	2	1	1	2	1	1	1	2	1	1	3	3	1	3	5	3	1	1	3	2	1	1	2	1	1
1	2	1	2	2	2	2	2	2	2	3	1	3	1	1	2	2	2	2	2	2	2	2	2	2	2
2	2	1	2	1	2	3	3	1	1	2	1	3	1	1	1	1	1	1	1	1	1	1	1	1	1
1	2	1	2	1	2	2	2	2	1	2	3	3	3	3	3	2	2	2	1	2	1	2	3	2	2
2	2	1	2	1	2	1	1	2	2	1	1	1	1	1	2	1	1	1	1	1	1	1	2	1	1
1	2	1	5	5	5	5	5	5	5	5	5	5	5	4	5	1	1	1	1	1	1	1	1	1	1
1	2	1	3	3	2	3	2	2	2	3	3	3	2	3	2	3	3	3	3	3	3	3	3	3	3
1	2	1	4	1	2	3	4	2	1	4	4	4	3	2	4	2	2	2	3	1	4	4	4	4	4
1	2	1	2	2	2	2	2	2	2	2	1	1	2	1	1	3	3	3	3	3	1	1	1	1	2
1	2	1	2	2	2	2	2	2	3	2	2	3	3	1	2	2	2	2	2	2	2	2	2	2	3
1	2	1	2	4	3	4	4	3	4	4	1	4	3	1	1	1	1	2	1	1	1	1	1	1	1
2	2	1	2	2	2	2	2	2	2	2	2	2	2	2	2	2	2	2	2	2	2	2	2	2	2
2	2	1	1	1	1	1	2	1	1	2	1	1	1	1	1	2	1	1	2	1	1	1	1	1	1
1	2	1	3	2	3	1	4	2	3	4	2	4	2	1	1	3	2	3	2	2	2	1	3	1	2
1	2	1	2	1	1	2	3	1	3	3	1	1	1	1	1	1	1	1	1	2	1	1	1	1	1
2	2	1	1	1	1	1	1	1	1	1	1	1	1	1	1	1	1	1	1	1	1	1	1	1	1
2	2	1	2	2	2	2	2	2	2	2	2	2	2	1	2	2	2	2	2	2	2	3	2	2	2
2	2	1	2	2	2	2	2	2	1	2	2	2	1	2	2	2	2	2	2	2	1	1	2	1	1
1	2	1	2	2	2	2	3	2	2	3	2	3	2	3	2	2	2	2	2	2	2	3	2	3	3
2	2	1	2	1	1	1	1	1	1	1	1	1	1	1	2	2	2	2	2	2	2	1	2	1	1
2	2	1	1	1	1	1	1	1	1	1	2	2	1	1	1	2	1	2	1	2	1	1	2	1	1
2	2	1	1	2	2	3	2	2	3	3	1	2	1	1	1	1	1	1	1	1	1	1	1	1	1
1	2	1	2	4	1	3	2	3	5	4	3	1	2	4	2	3	2	5	2	4	2	4	3	1	2
2	2	1	2	2	2	2	2	2	2	2	2	2	1	2	2	1	1	1	1	1	1	1	1	1	1
1	2	1	4	3	3	3	4	4	4	4	3	3	3	3	3	3	3	2	2	3	3	3	3	3	3
2	2	1	3	3	3	3	3	4	2	3	2	1	2	1	2	2	2	2	2	2	1	2	3	1	2
1	2	1	2	2	2	2	2	2	2	2	2	2	2	2	2	2	2	2	2	2	2	2	2	2	2
2	2	1	1	1	1	1	1	1	1	1	1	1	1	1	1	1	1	1	1	1	1	1	1	1	1
1	2	1	1	1	1	1	1	2	1	1	1	3	1	2	1	1	1	1	1	1	2	2	3	2	3
2	2	1	1	1	2	1	1	1	1	3	1	1	1	1	2	2	2	1	2	2	1	1	1	1	1
2	2	1	2	2	1	2	2	1	1	2	1	1	1	1	1	2	2	2	2	2	1	1	2	1	1
2	2	1	1	1	1	1	1	1	3	1	1	1	1	1	1	1	1	1	1	1	1	1	1	1	1
1	2	1	2	3	2	2	2	2	2	3	1	2	1	1	2	3	2	2	3	2	1	1	2	1	2
1	2	1	2	4	2	3	3	3	3	4	3	4	2	2	3	2	3	2	3	4	3	4	2	2	3
1	2	1	3	2	3	3	4	3	3	3	2	3	2	3	2	3	3	3	3	3	2	2	2	2	2
1	2	1	2	1	2	1	3	2	3	2	1	4	1	2	2	2	1	1	1	2	1	1	1	1	1
2	2	1	2	1	2	2	1	2	2	1	1	1	1	1	1	1	1	1	1	1	1	1	1	1	1
2	2	1	3	3	2	2	2	2	3	3	1	1	2	1	3	2	3	2	2	2	2	1	3	1	1
1	2	1	3	3	4	3	4	4	3	4	4	2	3	3	2	3	3	4	4	4	4	3	5	5	4
2	2	1	1	2	2	1	1	1	2	2	1	1	1	1	1	1	1	1	1	2	1	1	1	2	1
2	2	1	1	2	2	1	2	1	2	3	1	3	2	1	2	3	1	2	1	3	1	2	3	2	2
1	2	1	2	2	3	3	2	2	2	2	2	3	2	2	2	2	2	2	2	1	2	2	2	2	2
2	2	1	2	1	2	1	2	1	3	2	2	4	2	2	1	1	1	1	1	2	1	1	1	1	1
1	2	1	1	1	1	1	1	1	1	1	1	1	1	1	1	1	1	1	1	1	1	1	1	1	1
2	2	1	4	4	4	4	2	4	4	4	2	3	2	2	4	2	2	3	2	2	3	3	3	3	3
2	2	1	1	2	2	1	1	1	2	3	1	1	1	1	1	1	1	1	1	1	1	1	2	1	2
2	2	1	1	1	2	2	1	1	1	2	1	1	1	1	1	1	1	1	1	1	1	1	1	1	1
2	2	1	3	2	3	3	2	3	3	4	3	4	3	3	3	2	2	1	1	3	2	3	3	3	3
1	2	1	1	2	3	1	1	2	1	1	1	1	1	1	1	3	2	2	3	3	3	3	3	3	3
2	2	1	3	2	2	3	1	1	3	3	1	1	1	1	1	1	1	1	1	1	1	1	1	1	1
1	2	1	1	1	1	1	1	1	1	1	1	1	1	1	1	1	1	1	1	1	1	1	1	1	1
1	2	1	3	3	4	3	4	3	3	4	4	3	3	2	4	3	3	4	3	3	3	3	3	4	4
2	2	1	1	1	2	2	2	2	2	3	1	3	1	1	2	1	1	2	1	1	1	1	1	1	1
2	2	1	1	1	1	1	2	1	2	1	1	1	1	1	1	1	1	2	1	2	1	2	2	1	1
2	2	1	3	3	3	3	3	2	3	4	3	3	3	3	3	2	2	2	2	2	3	2	3	2	3
1	2	1	4	2	4	3	3	3	2	3	3	3	3	3	4	2	3	3	3	2	3	2	3	2	1
2	2	1	1	1	1	1	1	1	1	1	1	1	1	1	1	1	1	1	1	1	1	1	1	1	1
1	2	1	3	1	1	3	2	1	1	3	1	1	2	1	1	2	2	1	2	1	1	1	1	1	1
2	2	1	2	2	2	2	2	2	2	2	2	2	2	2	2	2	2	2	2	2	2	2	2	2	2
2	2	1	2	1	2	1	1	1	2	3	1	1	1	1	1	2	1	1	1	1	1	1	1	1	1
2	2	1	1	1	1	1	1	1	1	1	1	1	1	1	1	1	1	1	1	1	1	1	1	1	1
1	2	1	2	2	2	2	2	2	2	2	2	2	2	2	2	2	2	2	2	2	2	2	2	2	2
2	2	1	1	1	1	1	1	1	1	1	1	1	1	1	1	1	1	1	1	1	1	1	1	1	1
1	2	1	5	3	5	5	5	3	5	5	5	5	5	4	4	1	2	1	1	2	1	3	3	2	1
2	2	1	3	3	3	3	2	3	3	4	4	3	3	3	3	2	2	2	2	2	2	2	2	2	2
1	2	1	3	3	3	3	3	3	3	3	3	3	3	3	3	3	3	3	3	3	2	3	3	3	3
1	2	1	3	3	3	3	2	3	3	3	2	3	3	2	3	2	3	3	3	2	2	3	3	3	2
2	2	1	1	3	3	3	3	3	3	3	3	3	3	3	3	3	3	3	3	3	3	3	3	3	3
1	2	1	3	3	3	3	3	3	3	3	3	3	3	3	3	3	3	3	3	3	3	3	3	3	3
1	2	1	3	3	3	2	2	1	3	3	1	3	2	1	2	2	2	2	2	2	2	2	2	2	2
1	2	1	3	3	2	3	3	3	4	2	1	4	1	1	1	3	3	2	3	2	3	1	4	2	3
1	2	1	2	2	3	2	3	3	3	1	3	3	3	2	3	3	1	3	2	3	2	3	3	2	3
1	2	1	3	2	3	3	2	3	3	2	2	3	3	3	4	3	3	2	4	3	3	3	2	3	3
1	2	1	3	2	2	3	2	2	4	2	2	3	2	3	2	2	2	2	3	1	1	1	3	1	1
1	2	1	3	2	4	2	4	3	2	3	2	2	2	2	3	3	2	3	2	3	1	1	2	1	1
2	2	1	2	1	1	2	2	2	2	2	1	1	1	2	1	2	2	3	2	3	1	1	2	1	2
1	2	1	2	2	2	2	3	2	2	3	1	2	1	1	1	1	1	1	1	1	1	1	2	1	2
1	2	1	3	3	3	3	3	3	3	3	3	3	3	3	3	3	3	3	3	3	3	3	3	3	3
1	2	1	2	3	4	1	2	2	3	1	2	3	3	4	2	4	1	3	2	1	3	3	3	4	2
2	2	1	3	3	3	3	4	2	3	4	2	2	1	2	1	1	2	3	2	2	2	1	2	1	2
2	2	1	3	2	3	3	3	3	2	3	2	3	3	2	2	2	2	3	2	2	2	2	4	2	2
2	2	1	3	3	4	3	3	3	3	4	2	2	2	1	2	2	2	2	1	2	1	1	1	1	1
2	2	1	4	3	4	2	3	3	4	5	1	2	3	1	3	2	3	2	2	2	1	1	1	1	1
1	2	1	3	3	3	4	4	3	3	3	3	3	3	2	2	3	2	4	3	3	3	2	3	3	3
1	2	1	3	2	1	3	1	1	3	3	1	4	1	2	3	3	3	3	3	3	2	3	3	2	3
2	2	1	3	2	3	3	2	1	3	3	1	2	1	1	1	2	2	3	2	2	2	2	3	2	2
1	2	1	2	1	3	2	2	1	2	3	1	1	1	1	1	1	2	1	1	1	1	1	2	1	1
2	2	1	4	2	4	5	3	3	5	5	1	1	1	1	1	2	2	1	1	1	2	1	3	2	2
1	2	1	2	2	2	1	3	2	3	2	2	2	2	2	2	2	2	3	2	2	1	1	1	1	1
1	2	1	2	3	2	2	1	4	3	1	2	4	3	2	3	3	2	2	1	2	3	2	2	2	4
1	2	1	4	4	4	3	5	2	2	4	4	3	2	2	4	2	2	2	2	1	5	3	5	4	5
2	2	1	1	1	1	2	1	1	1	2	1	1	1	1	1	1	1	1	1	1	1	1	1	1	1
1	2	1	4	4	5	4	3	3	3	5	1	5	1	1	2	1	1	1	1	3	4	3	4	4	4
2	2	1	3	3	2	2	2	2	2	3	1	2	2	1	1	3	3	2	3	2	2	2	2	2	2
1	2	1	4	4	4	4	4	4	4	4	4	4	4	4	4	4	4	4	4	4	4	4	4	4	4
1	2	1	5	5	5	5	5	5	5	5	5	5	5	5	5	5	5	5	5	5	5	5	5	5	5
1	2	1	5	2	4	4	4	2	4	4	2	1	3	2	4	2	3	3	2	2	2	2	2	2	3
2	2	1	2	2	2	2	2	2	2	3	2	2	2	2	2	2	2	2	2	2	2	2	2	2	2
2	2	1	3	2	3	3	3	2	3	3	1	1	1	1	1	1	2	1	1	1	1	1	3	1	1
2	2	1	3	2	1	2	2	1	3	3	1	1	1	1	1	2	2	2	2	2	2	2	2	2	2
1	2	1	3	3	3	3	3	3	3	3	3	3	3	3	3	3	3	3	3	3	3	3	3	3	3
1	2	1	3	2	5	2	3	2	2	3	2	2	2	2	2	2	2	3	2	2	2	2	3	2	2
1	2	1	2	5	2	3	4	3	3	3	2	3	3	1	3	3	3	3	2	2	2	4	4	3	3
1	2	1	4	4	4	2	2	2	2	4	4	4	3	3	4	2	2	4	2	3	1	1	4	1	1
1	2	1	4	3	3	5	3	4	5	4	2	4	3	3	4	3	4	4	5	5	1	4	1	2	3
1	2	1	3	3	4	2	3	2	3	4	3	2	2	3	2	3	3	2	3	3	3	2	2	2	3
2	2	1	1	1	1	1	2	1	2	1	1	1	1	1	1	2	2	1	1	2	2	1	2	1	2
1	2	1	4	4	4	4	3	3	4	4	2	3	3	2	2	2	2	3	3	2	2	2	4	3	2
2	2	1	3	2	3	3	2	3	2	3	2	2	2	2	2	2	2	2	2	2	2	2	2	2	2
1	2	1	2	3	2	1	3	1	1	2	3	4	3	4	2	2	3	3	2	2	3	3	3	4	4
2	2	1	4	4	3	3	4	3	3	4	4	4	4	4	5	4	4	4	4	4	4	4	4	4	4
1	2	1	1	1	1	1	1	1	1	1	1	1	1	1	1	2	2	1	2	1	1	1	1	1	1
1	2	1	3	3	3	3	3	4	3	3	3	3	2	3	3	2	3	2	2	3	3	2	3	2	3
1	2	1	4	2	2	2	2	3	3	4	1	4	1	1	2	3	3	4	2	3	1	1	1	1	1
1	2	1	3	2	3	3	2	2	4	3	2	4	2	2	2	3	3	3	3	2	1	2	2	1	1
1	2	1	2	1	2	1	1	1	3	2	1	1	1	1	1	2	2	2	2	2	1	1	2	1	1
1	2	1	4	4	4	4	4	4	4	4	4	4	4	4	4	4	4	4	4	3	4	4	4	4	4
2	2	1	1	1	2	1	1	1	1	2	1	1	1	1	2	1	1	1	1	1	1	1	2	2	2
1	2	1	2	2	2	2	3	2	2	2	2	2	2	2	2	2	2	2	2	2	2	2	2	2	2
2	2	1	4	3	4	4	3	2	2	5	1	4	2	2	3	2	2	3	2	2	1	1	2	1	1
1	2	1	2	2	2	2	2	2	2	2	2	2	1	2	2	2	2	2	2	2	2	2	3	2	2
2	2	1	3	3	3	3	2	2	3	4	2	2	1	1	1	2	2	1	2	1	2	2	2	2	2
2	2	1	1	1	2	1	2	1	3	3	1	1	1	1	1	2	2	2	1	2	2	1	2	1	2
1	2	1	5	5	5	1	5	3	1	5	5	4	5	5	5	4	4	4	4	4	2	2	3	2	2
2	2	1	2	2	2	2	3	2	3	2	1	1	2	1	1	2	2	2	2	2	2	2	2	2	2
1	2	1	2	2	4	3	3	5	3	4	3	3	3	3	3	3	2	2	2	2	2	2	3	2	2
2	2	1	1	1	1	1	1	1	1	1	1	1	1	1	1	3	3	3	3	3	3	3	3	3	3
2	2	1	1	1	2	2	1	1	1	2	1	4	1	1	2	1	2	2	2	2	1	1	2	1	1
2	2	1	2	2	2	2	2	2	2	3	2	2	2	2	2	2	2	2	2	2	2	2	2	2	2
1	2	1	2	2	2	2	2	2	2	2	2	2	2	2	2	2	2	2	2	2	2	2	2	2	2
1	2	1	3	2	3	2	3	2	2	5	1	1	2	2	1	2	2	1	2	2	2	3	2	3	2
2	2	1	1	1	1	1	3	2	1	1	1	1	1	1	1	1	1	1	1	1	1	1	1	1	1
1	2	1	2	2	2	3	3	3	4	3	4	5	4	5	3	3	4	5	4	4	4	5	4	5	3
2	2	1	1	1	1	1	1	1	1	1	1	1	1	1	1	1	1	1	1	1	1	1	1	1	1
2	2	1	2	1	2	2	1	2	3	3	1	1	1	1	1	1	1	1	1	1	1	1	1	1	1
2	2	1	2	2	2	2	3	2	3	2	2	2	1	1	2	2	2	2	2	2	2	2	2	2	2
2	2	1	2	3	3	3	3	2	3	4	3	4	3	3	3	2	2	2	2	2	2	2	3	2	3
2	2	1	1	1	1	1	1	1	1	1	1	1	1	1	1	1	1	1	1	1	1	1	1	1	3
2	2	1	5	3	3	4	3	2	4	5	2	5	3	3	3	2	4	2	3	1	1	1	2	2	1
1	2	1	3	2	3	2	3	1	3	3	2	1	2	1	1	2	2	1	2	2	2	1	3	2	2
1	2	2	2	2	3	2	2	2	2	2	2	2	1	1	1	4	4	4	4	4	1	1	3	2	1
1	2	2	4	3	2	2	4	3	3	4	2	2	2	1	2	3	3	3	3	2	3	2	2	2	2
1	2	2	3	2	3	2	2	2	3	2	2	2	2	2	2	2	2	2	2	2	1	1	3	1	1
1	2	2	3	1	1	3	2	2	3	1	1	1	1	1	1	3	3	3	2	3	1	1	2	1	1
1	2	2	3	3	3	3	3	3	3	3	3	3	3	3	3	5	3	5	3	2	1	1	3	1	1
1	2	2	2	2	3	3	3	2	3	2	2	2	1	1	1	2	2	2	2	3	1	2	3	1	1
1	2	2	3	2	3	3	3	3	3	3	3	3	3	3	3	3	3	3	3	3	3	3	3	3	3
2	2	2	2	2	2	2	2	2	2	2	2	2	2	2	2	2	2	2	2	2	2	2	2	2	2
1	2	2	1	1	3	3	3	2	3	3	1	1	1	1	1	2	2	2	2	3	1	1	3	3	1
2	2	2	1	2	1	2	1	2	2	1	1	1	1	2	3	1	1	1	1	1	1	1	2	1	1
2	2	2	2	1	1	2	1	1	2	3	1	1	1	1	1	1	2	2	1	1	1	1	1	1	2
2	2	2	1	1	1	1	1	1	1	1	1	1	1	1	1	1	1	1	1	1	1	1	1	1	1
2	2	2	1	2	2	1	2	1	1	2	1	1	1	1	1	2	2	2	1	2	1	1	2	1	2
1	2	2	3	3	3	2	3	1	1	3	2	3	3	2	3	3	3	3	3	3	2	4	4	3	4
2	2	2	4	4	3	4	3	3	3	4	4	5	3	4	3	4	4	4	4	4	2	2	2	3	1
2	2	2	2	2	2	2	1	2	4	3	2	2	3	1	4	2	2	2	2	2	1	2	3	1	1
2	2	2	2	2	3	2	3	3	2	2	2	3	2	2	2	3	3	3	2	3	2	2	3	2	3
1	2	2	3	2	2	2	3	2	2	3	2	3	2	2	3	2	2	3	2	2	2	2	2	2	2
2	2	2	2	2	2	2	2	2	2	2	2	2	2	2	2	2	2	2	2	2	2	2	3	2	2
1	2	2	1	1	1	1	1	1	1	1	1	1	1	1	1	1	1	1	1	1	1	1	2	1	1
2	2	2	1	2	3	3	3	2	2	3	1	1	1	1	1	1	1	1	1	2	1	1	2	1	1
2	2	2	2	3	2	2	3	2	2	2	2	2	2	2	2	2	2	2	2	2	1	1	1	1	1
2	2	2	1	1	1	1	1	1	2	2	1	1	1	1	1	1	1	1	2	2	1	1	2	1	1
1	2	2	3	2	3	2	2	3	2	3	3	2	3	2	3	3	3	3	2	2	2	1	2	1	1
2	2	2	1	1	3	1	1	1	1	1	1	1	1	1	1	2	1	1	1	1	1	1	1	1	2
2	2	2	2	2	2	2	2	2	2	2	2	2	2	2	2	2	2	2	2	2	2	2	3	2	2
2	2	2	1	2	1	1	1	1	2	1	1	1	1	1	1	2	3	2	3	3	2	3	2	2	2
2	2	2	1	1	1	1	1	1	1	1	1	2	1	1	1	1	2	2	1	2	1	1	1	1	1
2	2	2	2	2	2	2	3	2	2	3	1	2	1	1	1	2	2	2	2	2	2	1	2	1	1
1	2	2	1	2	1	1	1	1	1	1	1	1	1	1	1	1	1	1	1	1	1	1	1	1	1
2	2	2	1	1	2	1	2	1	2	1	1	1	1	1	1	2	1	2	2	2	2	1	1	1	2
2	2	2	2	2	2	2	2	2	2	2	2	2	2	2	2	2	2	2	2	2	2	2	2	2	2
2	2	2	2	2	2	3	1	2	3	3	1	1	2	1	2	1	1	2	1	1	1	1	1	1	1
2	2	2	1	1	2	1	1	1	2	1	1	1	1	1	2	2	1	1	1	1	1	1	2	1	2
2	2	2	2	2	3	3	1	2	3	4	2	2	2	2	2	1	2	1	1	1	1	3	2	1	3
2	2	2	2	2	3	2	3	1	3	3	1	2	1	1	2	2	2	2	2	2	1	1	3	1	1
2	2	2	1	1	1	1	1	1	1	1	1	1	1	1	1	1	1	1	1	1	3	2	2	1	3
2	2	2	1	1	3	2	1	2	2	2	2	3	1	1	1	2	2	3	2	2	2	1	1	1	2
2	2	2	1	1	1	1	1	1	1	1	1	1	1	1	1	1	1	1	1	1	1	1	1	1	1
1	2	2	2	1	2	2	2	2	3	1	1	1	1	1	1	2	2	2	2	2	1	1	2	1	2
2	2	2	2	2	2	1	2	2	2	1	2	2	1	2	1	2	1	2	2	2	1	1	2	1	1
2	2	2	2	2	2	2	2	2	2	2	2	1	1	1	2	2	1	2	1	2	2	2	2	2	2
2	2	2	2	2	2	2	2	2	2	4	3	3	2	3	4	2	2	2	2	2	1	1	1	1	1
2	2	2	2	2	2	2	1	2	2	2	2	3	1	2	3	2	2	2	2	2	2	3	3	2	3
2	2	2	1	1	1	1	1	1	2	2	1	1	1	1	1	1	1	2	1	1	2	1	2	1	2
2	2	2	2	1	2	1	2	1	1	2	1	1	1	1	1	1	1	1	2	2	2	1	3	1	2
2	2	2	3	2	4	2	2	2	2	4	2	3	2	2	2	2	2	2	2	2	2	2	4	2	3
2	2	2	3	2	3	3	4	3	2	4	3	3	2	3	3	3	3	3	3	2	2	2	3	1	3
2	2	2	1	1	2	2	2	2	3	2	1	1	1	1	2	2	3	3	3	3	1	1	2	1	2
2	2	2	2	1	1	1	2	2	4	2	1	1	1	1	2	2	2	2	2	2	1	1	2	1	1
2	2	2	1	1	1	2	1	1	1	1	1	1	1	1	1	1	1	1	1	1	1	1	2	1	3
1	2	2	1	2	2	2	2	2	2	1	1	1	1	1	1	2	1	2	2	1	2	2	3	3	2
1	2	2	2	2	2	4	2	2	4	4	2	2	2	2	2	2	2	2	2	2	2	2	2	2	2
2	2	2	3	3	3	2	3	3	2	4	4	2	4	4	4	2	2	2	2	2	3	4	4	3	4
2	2	2	2	2	2	1	2	2	2	3	1	1	1	1	1	1	1	1	1	2	1	1	3	1	1
1	2	2	4	3	3	1	3	3	2	4	4	2	4	4	3	2	2	2	2	2	2	2	2	2	2
1	2	2	3	2	3	3	2	1	2	4	2	1	1	1	3	3	2	3	2	2	2	2	4	3	2
2	2	2	2	2	1	2	1	1	3	2	1	1	1	1	1	3	2	2	3	2	1	1	2	1	1
1	2	2	2	2	2	2	3	2	2	2	2	2	2	2	2	3	2	3	2	3	2	2	3	2	2
2	2	2	1	2	2	2	2	2	2	2	2	1	2	1	1	1	1	1	1	1	1	1	1	1	1
1	2	2	2	1	1	2	1	2	1	3	2	3	1	1	1	2	2	3	2	3	2	1	3	1	1
2	2	2	2	2	3	3	3	3	3	3	3	2	2	2	3	2	2	2	2	2	2	3	2	2	1
2	2	2	2	2	2	1	2	1	2	2	1	2	1	1	2	2	2	2	2	2	1	2	3	1	2
1	2	2	2	3	1	2	3	3	2	2	3	2	2	3	2	2	2	2	2	2	1	1	3	1	2
1	2	2	1	2	2	2	2	2	2	2	2	1	1	2	2	2	2	2	2	1	1	1	2	1	1
1	2	2	1	1	2	2	1	2	3	2	2	1	1	2	2	3	1	2	3	1	1	1	3	1	2
1	2	2	1	1	1	1	1	1	1	1	1	1	1	1	1	2	2	2	2	1	1	1	1	1	1
1	2	2	1	2	2	1	2	1	3	1	1	1	1	1	1	2	2	2	2	2	1	1	1	1	1
1	2	2	2	3	2	3	3	3	3	3	2	3	2	2	3	3	2	2	3	2	1	1	1	1	1
1	2	2	2	1	1	2	1	2	1	2	2	1	1	1	1	2	2	1	2	1	2	1	3	2	2
1	2	2	3	2	2	2	2	3	2	3	3	2	2	3	3	3	3	2	3	2	2	3	2	3	2
1	2	2	2	2	3	2	5	2	3	2	2	2	1	2	2	2	2	2	2	2	2	1	2	2	3
1	2	2	2	1	1	2	2	3	1	1	2	3	3	1	1	3	2	2	3	2	1	1	3	2	3
1	2	2	3	2	2	2	3	2	2	2	2	2	2	2	2	2	2	2	2	2	2	2	2	2	2
1	2	2	2	2	2	2	2	2	2	2	2	2	2	2	2	2	2	2	2	2	1	1	2	1	1
1	2	2	1	1	3	1	3	2	2	2	2	2	1	1	2	2	2	2	2	3	1	1	2	2	3
2	2	2	1	1	2	2	2	1	2	3	2	2	1	1	1	2	2	2	2	2	1	1	2	1	2
2	2	2	2	1	2	1	1	2	2	1	2	2	2	2	2	2	2	2	2	2	2	2	2	2	2
1	2	2	1	1	2	2	3	2	2	3	2	2	2	2	2	1	1	1	1	1	1	1	1	1	1
2	2	2	2	3	3	4	4	3	3	4	4	4	4	4	4	3	3	3	3	3	2	2	2	2	2
2	2	2	3	2	4	4	3	2	4	4	3	3	1	1	4	1	2	1	2	1	2	2	3	2	3
2	2	2	5	5	5	5	5	5	5	5	4	4	3	3	4	3	4	3	3	3	4	4	4	4	4
1	2	2	4	2	4	2	3	3	3	4	3	1	4	4	3	2	3	3	3	2	2	2	2	1	3
1	2	2	2	2	2	2	2	2	2	2	2	3	3	2	2	2	2	2	2	2	1	1	1	1	2
2	2	2	2	2	2	3	1	2	4	3	3	4	3	1	2	4	3	3	3	3	3	2	2	2	3
1	2	2	2	1	2	2	2	2	2	3	1	1	1	1	1	1	1	1	1	1	1	1	1	1	1
2	2	2	1	1	1	1	1	1	1	1	1	1	1	1	1	1	1	1	1	1	1	1	1	1	1
2	2	2	2	2	2	2	2	2	1	3	1	1	1	1	1	2	2	3	3	2	2	3	3	3	3
2	2	2	3	2	1	2	2	3	2	3	3	4	3	3	3	2	3	2	3	2	3	3	4	2	3
2	2	2	3	3	3	3	3	3	3	3	2	3	2	2	2	3	3	3	3	3	2	2	2	2	2
2	2	2	2	2	2	2	2	2	2	2	2	2	2	2	2	2	2	2	2	2	2	2	3	2	2
1	2	2	4	2	3	3	3	1	4	3	4	3	3	2	3	4	5	3	4	2	2	1	5	3	4
2	2	2	2	2	3	2	2	2	2	3	1	1	1	1	1	2	2	2	2	2	2	2	2	2	2
1	2	2	2	2	3	2	3	2	2	2	1	2	1	2	1	2	2	3	3	3	1	1	2	1	1
1	2	2	3	2	2	2	4	1	2	3	2	2	3	1	1	4	4	4	4	2	1	1	4	1	1
2	2	2	2	2	2	2	2	2	2	2	2	2	2	2	2	2	2	2	2	2	2	2	2	2	2
1	2	2	3	2	3	2	2	2	3	2	2	2	1	2	2	2	2	2	2	3	3	3	4	2	3
2	2	2	4	4	3	3	4	4	4	4	4	3	3	4	3	4	3	4	4	3	3	3	4	3	3
2	2	2	2	2	2	2	3	2	2	2	1	1	1	1	1	1	1	1	1	2	1	1	1	1	1
2	2	2	1	2	2	2	3	1	3	2	1	1	1	1	1	2	2	2	2	2	1	2	2	1	1
2	2	2	3	4	4	3	4	2	3	4	1	1	2	2	3	2	3	3	3	2	2	1	1	1	1
2	2	2	2	2	2	2	2	2	2	2	1	2	1	1	1	2	2	2	2	2	2	2	1	2	2
2	2	2	3	3	4	3	4	3	4	4	3	3	3	4	4	3	3	3	3	3	4	4	4	4	4
2	2	2	2	1	2	2	2	2	2	2	1	1	1	1	2	1	2	2	2	1	1	1	1	2	2
1	2	2	2	2	1	2	3	1	2	2	1	1	1	1	1	3	2	4	2	2	2	1	3	1	2
2	2	2	2	3	2	3	4	4	4	3	2	2	3	3	2	2	2	2	2	3	3	1	3	2	2
2	2	2	1	3	1	1	2	1	2	2	1	1	2	1	1	2	1	2	2	2	1	1	2	1	1
2	2	2	1	1	1	1	2	1	2	3	1	1	1	2	1	1	1	3	2	3	1	2	3	1	2
2	2	2	2	2	2	3	2	2	2	3	1	2	2	1	3	2	2	1	2	2	2	1	3	1	2
2	2	2	2	2	3	4	2	2	3	3	2	1	1	1	1	2	2	3	2	2	2	2	2	2	2
2	2	2	3	2	2	3	2	2	3	3	1	1	2	1	1	1	2	1	2	2	1	2	1	1	1
2	2	2	3	2	3	2	3	1	3	3	2	1	1	1	1	2	2	1	2	2	1	1	1	1	1
1	2	2	2	2	2	2	2	2	3	3	1	1	1	1	1	4	2	3	3	2	2	2	2	2	2
1	2	2	1	1	1	2	1	1	1	1	1	1	1	1	1	1	1	1	1	1	1	1	1	1	1
2	2	2	1	1	1	2	3	1	3	3	1	2	1	1	1	1	2	1	2	2	1	1	1	1	2
1	2	2	2	2	3	3	3	2	2	3	2	3	1	2	3	2	2	3	2	2	1	1	3	1	2
1	2	2	3	2	2	3	3	2	2	3	1	2	1	1	2	3	3	3	3	1	1	3	3	1	1
2	2	2	3	2	2	2	2	1	2	3	1	1	1	1	1	2	2	2	2	2	1	1	3	1	2
2	2	2	2	2	2	2	2	2	2	2	2	2	1	1	2	1	1	2	1	2	1	1	2	1	1
1	2	2	4	3	3	3	4	3	3	4	3	2	4	2	3	3	3	3	3	3	3	2	3	2	2
2	2	2	3	2	2	1	2	2	2	3	1	1	1	1	1	2	2	2	2	2	2	2	2	2	2
2	2	2	2	3	3	3	2	3	4	4	2	1	2	2	2	3	3	4	4	3	2	2	4	2	1
2	2	2	3	2	3	2	3	2	3	3	2	3	1	2	3	2	1	2	2	2	1	1	3	1	1
2	2	2	2	2	2	2	2	2	3	3	1	1	1	1	2	2	2	2	2	2	2	2	2	2	2
2	2	2	2	2	2	2	2	2	2	3	2	2	2	2	2	2	2	2	2	2	2	2	2	3	3
1	2	2	3	2	4	3	3	3	3	2	2	2	2	2	3	3	2	2	3	2	2	2	3	2	2
1	2	2	2	1	2	3	2	1	2	3	1	3	1	1	1	2	2	3	3	2	1	2	2	1	1
2	2	2	2	2	3	2	2	3	2	3	2	1	1	1	2	2	2	3	2	3	1	1	2	1	2
2	2	2	2	1	1	1	1	1	1	1	1	1	1	1	1	1	1	1	2	2	1	1	1	1	1
2	2	2	2	3	2	2	3	2	2	2	3	3	3	3	2	3	2	2	2	2	2	2	3	1	2
1	2	2	2	2	2	2	3	2	2	2	2	2	2	2	2	2	2	2	2	2	2	2	2	2	2
2	2	2	3	3	2	2	2	3	2	1	2	2	3	3	2	2	2	2	2	2	2	3	2	2	2
2	2	2	1	1	1	2	1	1	1	4	1	2	1	1	3	2	2	2	3	2	2	2	3	2	2
1	2	2	2	2	1	1	1	2	3	3	2	1	1	1	1	1	1	1	1	2	1	1	1	1	1
1	2	2	1	1	1	1	1	1	1	2	1	2	1	1	1	1	1	2	1	1	1	1	1	1	1
1	2	2	2	2	2	2	3	2	2	3	2	2	2	2	2	2	2	2	2	2	2	2	3	2	3
1	2	2	2	2	2	1	3	2	2	2	1	1	1	1	1	2	2	2	2	2	1	1	3	1	3
1	2	2	4	4	4	4	4	3	3	4	4	3	4	3	4	3	3	3	3	2	2	2	2	2	2
2	2	2	1	1	2	2	1	4	1	2	1	2	1	1	1	2	2	2	2	2	1	1	1	1	1
2	2	2	2	2	2	2	2	2	3	2	2	3	2	3	2	2	2	2	2	2	2	2	3	2	2
2	2	2	1	1	1	1	1	1	2	1	1	3	1	1	1	2	2	2	2	2	2	1	2	1	1
2	2	2	1	1	1	2	1	1	2	1	1	1	1	1	1	2	2	2	2	3	1	2	3	1	3
1	2	2	2	2	1	2	2	3	1	2	1	2	1	2	1	3	3	2	3	2	1	1	1	1	1
1	2	2	2	2	2	2	3	2	2	3	2	3	2	2	2	3	2	2	3	2	2	2	3	2	1
1	2	2	3	2	3	4	3	3	2	3	4	4	3	3	4	4	3	3	4	4	1	2	4	1	3
1	2	2	2	2	3	2	3	2	3	2	2	1	1	1	1	3	2	3	3	2	2	1	2	1	2
1	2	2	2	1	2	2	1	2	1	2	1	1	1	1	2	2	2	2	2	2	1	1	1	1	1
1	2	2	2	2	1	3	1	3	2	1	2	3	2	2	2	2	2	3	3	2	1	1	2	1	1
1	2	2	2	2	2	3	3	3	3	3	2	2	2	1	3	3	3	3	3	3	2	2	2	1	2
2	2	2	2	2	2	2	2	2	2	2	1	1	1	1	1	2	2	2	2	2	1	2	3	1	2
1	2	2	1	1	1	1	1	1	2	1	1	1	1	1	1	2	2	2	2	2	1	1	1	1	1
1	2	2	2	2	3	3	3	3	3	3	2	2	1	2	1	3	2	2	3	3	2	1	3	1	1
1	2	2	2	4	4	1	3	3	3	4	1	1	1	1	1	2	2	2	2	2	3	3	3	3	3
1	2	2	3	2	3	2	4	3	2	4	1	1	1	1	1	2	3	3	3	1	2	1	1	1	2
1	2	2	1	1	1	1	1	1	1	1	1	1	1	2	3	1	1	1	1	1	1	1	2	1	2
1	2	2	2	3	2	2	3	2	2	2	1	2	2	1	1	2	2	2	2	1	1	1	2	1	2
1	2	2	2	2	3	2	3	2	3	3	2	2	2	1	2	3	3	3	3	3	2	2	3	2	2
1	2	2	2	1	1	3	3	2	2	2	3	2	1	2	1	3	3	4	2	2	1	1	1	1	1
1	2	2	3	3	4	2	3	3	2	4	2	2	1	1	1	3	2	2	3	3	2	2	3	2	2
2	2	2	3	3	3	2	3	1	3	3	2	2	3	2	3	2	2	2	2	2	2	1	2	2	1
1	2	2	3	2	3	3	3	2	2	3	1	1	1	1	2	2	2	2	2	2	2	1	2	1	2
2	2	2	3	3	4	3	4	3	4	4	2	2	2	2	2	3	3	3	3	3	2	2	2	2	2
2	2	2	1	2	3	3	3	3	2	1	1	1	1	1	1	1	1	1	1	1	1	1	1	1	1
2	2	2	3	3	4	3	3	2	4	4	3	3	3	2	3	3	3	3	3	3	2	2	3	2	2
1	2	2	2	2	1	1	4	1	2	3	3	2	3	2	1	2	3	1	2	2	3	1	4	1	4
1	2	2	1	1	4	1	4	1	1	3	1	1	1	1	4	1	1	1	1	1	3	4	1	1	1
2	2	2	2	4	3	4	4	3	3	4	3	4	4	3	3	3	3	3	3	2	3	3	3	3	3
2	2	2	2	2	2	2	2	2	2	3	1	1	1	1	1	2	2	4	2	2	2	2	2	2	2
1	2	2	5	5	5	5	5	4	5	5	5	2	3	2	3	5	5	5	5	5	3	3	4	3	3
2	2	2	5	4	5	4	4	5	3	5	4	5	4	4	4	4	3	3	4	3	4	4	4	4	3
1	2	2	3	3	2	4	2	2	2	2	1	1	1	1	1	1	1	1	1	1	1	1	4	1	2
1	2	2	1	1	1	1	3	1	1	1	1	1	1	1	1	1	1	1	1	1	1	1	1	1	1
1	2	2	3	2	2	2	5	4	2	2	3	3	1	3	3	3	3	3	3	3	1	1	2	2	2
1	2	2	2	2	2	1	3	2	2	2	2	2	2	1	2	2	3	2	2	2	2	2	3	2	3
1	2	2	4	2	3	4	2	3	3	3	2	2	2	2	2	4	3	3	3	3	2	2	3	2	2
1	2	2	3	3	2	3	3	2	3	4	2	1	1	2	3	3	2	2	3	2	2	1	2	1	3
1	2	2	3	3	3	3	4	2	3	3	2	2	3	2	3	3	3	2	3	3	2	2	3	2	2
1	2	2	5	4	5	4	4	4	3	4	4	3	4	3	2	3	3	3	4	3	4	5	3	4	4
2	2	2	3	2	2	3	2	1	2	2	2	2	1	1	1	1	1	2	2	2	1	1	2	1	3
1	2	2	3	3	3	4	2	2	3	3	2	2	4	2	3	4	2	3	3	2	2	2	2	2	3
1	2	2	2	2	2	2	2	2	2	2	2	2	1	2	2	2	2	2	1	1	1	2	2	1	2
2	2	2	2	2	2	3	3	2	2	2	2	3	1	1	2	2	2	3	2	2	2	1	4	2	2
1	2	2	3	2	2	3	3	3	3	3	2	3	2	1	2	3	3	3	3	3	3	2	4	4	4
1	2	2	2	1	2	2	3	3	3	2	1	1	1	1	1	2	3	3	3	3	1	1	1	1	1
2	2	2	5	5	5	5	5	5	5	5	5	5	5	5	5	5	5	4	5	3	4	3	4	4	5
2	2	2	2	2	2	2	2	2	3	2	2	1	2	1	2	3	2	3	3	2	3	2	2	2	3
1	2	2	2	2	2	2	3	2	2	3	3	2	1	3	4	3	3	2	3	2	1	1	1	1	1
2	2	2	1	2	4	2	4	1	1	2	1	4	3	1	5	1	2	3	1	2	2	1	4	1	2
1	2	2	2	2	3	4	4	3	2	3	3	3	3	3	4	3	2	1	3	2	2	2	3	2	2
2	2	2	2	2	2	2	2	2	2	2	3	2	3	3	3	2	2	3	2	3	2	3	3	2	3
2	2	2	3	2	3	3	3	3	3	3	2	2	1	2	1	2	2	2	2	1	2	1	4	2	2
2	2	2	3	1	3	2	2	1	2	4	1	1	1	1	1	1	2	2	1	1	1	1	1	1	1
1	2	2	1	1	2	1	3	1	3	2	1	1	1	2	1	2	1	1	2	2	1	1	1	1	1
1	2	2	2	2	3	3	3	2	3	3	1	1	1	1	2	3	2	2	2	2	1	2	3	2	3
1	2	2	3	2	2	2	3	2	3	3	2	2	2	2	2	2	2	2	2	2	2	2	2	2	2
1	2	2	3	4	2	3	5	3	1	3	5	4	5	4	4	4	3	2	3	2	3	3	3	3	3
1	2	2	2	3	2	4	2	2	2	2	2	2	2	2	2	2	2	3	2	3	2	3	4	2	4
1	2	2	2	2	1	2	3	2	2	4	2	2	2	3	1	1	1	2	1	3	2	2	3	2	3
1	2	2	4	2	4	4	3	3	3	3	3	2	2	1	3	3	3	2	3	4	3	4	4	3	4
1	2	2	3	2	3	3	2	2	2	3	2	3	1	1	3	2	3	2	2	2	3	2	4	2	4
